# Supplementary material
Source: publisher site journal article supplement (https://www.spandidos-publications.com/7331/downloadSupplementary)
Supplement: Supplementary file 1 [file downloadSupplementary]

## Sheet: Table S13
Table SXIII. Drug predictions.
	Camptothecin_1003	Vinblastine_1004	Cisplatin_1005	Cytarabine_1006	Docetaxel_1007	Gefitinib_1010	Navitoclax_1011	Vorinostat_1012	Nilotinib_1013	Olaparib_1017	Axitinib_1021	AZD7762_1022	SB216763_1025	KU-55933_1030	Afatinib_1032	Staurosporine_1034	PLX-4720_1036	NU7441_1038	Doramapimod_1042	Wee1 Inhibitor_1046	Nutlin-3a (-)_1047	Mirin_1048	PD173074_1049	ZM447439_1050	Alisertib_1051	RO-3306_1052	MK-2206_1053	Palbociclib_1054	Dactolisib_1057	Pictilisib_1058	AZD8055_1059	PD0325901_1060	Obatoclax Mesylate_1068	5-Fluorouracil_1073	Dasatinib_1079	Paclitaxel_1080	Crizotinib_1083	Rapamycin_1084	Sorafenib_1085	BI-2536_1086	Irinotecan_1088	Oxaliplatin_1089	BMS-536924_1091	GSK1904529A_1093	Tozasertib_1096	PF-4708671_1129	PRIMA-1MET_1131	Erlotinib_1168	Niraparib_1177
TCGA-BJ-A28W	0.0463182	0.0387766	8.33687	4.84712	0.00639527	27.6076	7.28094	4.0299	30.8832	50.5252	25.6374	0.679828	172.809	46.8445	10.3292	0.0398573	45.9048	12.0265	84.4392	11.9144	51.7576	96.6291	89.2015	22.7116	4.10109	22.415	16.4317	25.0797	0.139077	4.7863	0.651068	1.05507	2.39645	66.4377	6.99161	0.0879689	33.931	0.107484	9.60048	2.98674	5.57509	13.575	9.07045	79.5176	44.552	27.9112	75.3675	9.01149	65.0274
TCGA-DJ-A3VF	0.0838177	0.028767	16.9768	7.18704	0.0120149	25.4228	6.50823	5.38228	50.6209	56.3825	23.7618	0.939578	149.394	51.6819	7.6493	0.024279	79.9553	10.317	84.7245	9.93452	77.6316	125.544	63.2251	16.9701	5.15292	18.6307	37.4477	70.0306	0.337248	7.28917	0.821536	1.30955	3.71628	219.547	4.71248	0.105361	24.9972	0.279983	22.8179	1.27351	12.1429	60.1499	7.61034	116.721	19.9461	54.5773	117.652	13.7836	86.6454
TCGA-CE-A482	0.0635527	0.00990557	18.756	3.04453	0.00847131	19.8089	6.20556	3.60208	32.1696	66.358	17.6304	0.768241	202.31	86.9368	3.76387	0.0300794	67.6861	14.086	103.683	5.03793	92.7409	75.9331	51.126	16.7878	4.35728	20.6066	16.7024	20.4201	0.147945	2.54031	0.827746	0.660086	3.90631	47.0342	3.84126	0.0312521	16.8222	0.0739095	12.1697	1.39632	8.81129	42.7515	5.67113	68.5757	11.6373	37.6503	92.6398	13.5886	57.6272
TCGA-EL-A3ZS	0.0379859	0.0108782	6.81318	2.34658	0.00860412	19.6777	2.6763	2.96781	25.6564	35.2297	13.1024	0.444427	126.785	61.025	5.76894	0.0216663	57.761	11.4131	76.3149	3.44912	56.4285	65.6341	28.3762	11.4893	2.69229	19.0661	13.9838	21.8698	0.149882	2.58677	0.698823	1.41695	2.42685	38.5644	2.2428	0.0379635	14.9401	0.065822	10.5372	1.75731	5.94354	25.0138	7.02019	58.2186	10.4941	28.6224	48.9906	12.5814	32.9573
TCGA-DJ-A3VB	0.15344	0.114817	34.9684	17.4896	0.0257206	35.4182	18.5366	7.42629	101.644	126.541	32.0422	1.45156	203.409	74.5398	10.0414	0.0774938	169.434	14.9817	112.549	22.4672	303.273	196.422	195.795	27.1033	21.3351	23.0721	90.4965	105.716	0.433631	15.1872	0.869362	1.32415	4.59552	371.671	8.80995	0.457874	51.8416	0.350296	40.2976	1.90949	18.3041	85.681	15.4662	179.771	39.1855	52.6596	185.917	13.8412	139.039
TCGA-BJ-A192	0.689654	0.0653534	120.406	20.8302	0.0171664	13.7195	9.64852	7.19746	34.0838	136.488	28.1384	2.1274	206.699	80.2919	4.07728	0.0943623	117.263	15.8978	86.1304	15.7807	102.107	344.899	87.3813	20.0828	17.8652	22.4128	12.7534	71.7455	0.327318	4.32767	0.865014	5.51971	7.74163	481.219	16.6065	0.0925671	52.6388	0.0824403	12.7406	2.19442	106.066	139.167	8.8113	86.4044	34.7125	56.6226	522.651	5.57869	169.908
TCGA-BJ-A3F0	0.285838	0.040169	68.4013	11.6225	0.01225	29.9548	8.85175	5.04963	30.5488	94.4053	20.1449	2.35364	215.922	63.3014	8.53683	0.0670874	60.9667	11.9479	91.9371	11.416	94.7906	133.01	63.0682	17.0521	11.8567	18.9839	13.8293	47.7818	0.120054	4.37572	0.724188	2.67287	4.48097	90.8657	4.35496	0.0947083	44.2784	0.0637923	11.7717	1.3649	32.4039	57.6737	12.8426	63.6442	16.9681	38.4268	144.055	14.3093	113.669
TCGA-BJ-A28X	0.0417464	0.0111004	6.92822	2.13779	0.00738402	17.3654	2.85284	3.69464	25.4026	35.8188	16.2469	0.390304	110.432	45.7361	4.89624	0.0187888	51.3684	9.81792	69.0673	4.03481	48.7862	92.621	32.2568	11.0157	2.16694	18.1805	17.4644	31.7487	0.186783	3.45636	0.729935	1.09447	2.77197	84.6684	2.07185	0.0422476	15.1783	0.146762	11.2973	1.71551	6.09365	24.2233	5.51196	74.1827	13.1724	33.5761	50.2324	8.67692	43.6971
TCGA-EL-A3GO	0.117993	0.0214328	18.5583	4.08736	0.0117853	28.2659	1.97533	3.08917	13.4694	56.5251	18.2219	0.781472	174.871	72.464	6.53691	0.0261358	91.8449	11.2985	76.523	3.43846	90.312	115.499	20.3011	12.549	5.14995	17.4758	11.9838	42.5764	0.214712	4.45781	0.874626	2.19841	3.28429	95.8239	3.63781	0.0394115	17.7382	0.0937019	7.77831	0.434785	17.5928	42.6855	9.93986	57.2794	10.3169	64.9106	55.7257	15.6953	56.0345
TCGA-EL-A4K1	0.211045	0.41693	40.6833	20.0427	0.0385516	40.1886	15.3781	6.78747	96.3133	113.297	45.8814	1.31205	199.255	64.7925	11.1871	0.0584048	126.667	12.7774	88.1066	57.0898	165.553	219.898	218.451	30.835	14.8321	22.5424	79.1541	122.73	0.597358	18.8171	0.977889	1.09324	3.56833	881.227	10.5683	1.5036	56.4349	0.96641	40.7633	0.846917	20.6611	82.6725	18.164	175.089	57.4282	81.4142	140.737	11.5578	114.508
TCGA-L6-A4EU	0.144758	0.0402557	34.3856	9.93073	0.0116878	28.0029	19.3994	6.87488	74.4156	108.209	25.7453	1.11386	198.47	69.2962	6.65719	0.0516817	129.42	15.0587	110.38	14.8682	183.266	179.067	172.56	23.6895	16.4478	23.3688	36.716	58.7756	0.269892	6.3278	0.81227	1.04428	5.50437	184.543	9.00997	0.126422	39.2446	0.263316	30.4706	2.44115	15.9236	63.9466	10.4091	165.512	32.2954	43.0927	152.809	10.9506	111.754
TCGA-DJ-A2QB	0.254563	0.0573501	56.876	10.6116	0.0164401	29.8858	7.62635	5.93522	29.6263	130.742	29.4701	2.3553	201.01	70.8856	8.26278	0.116367	117.454	12.703	77.438	10.319	113.605	225.985	73.1074	23.1142	12.4471	18.8424	31.0531	97.3658	0.337452	8.14644	0.838641	2.5834	6.02657	303.567	14.8489	0.111316	36.6247	0.156388	11.4877	0.963766	31.928	54.3585	13.757	77.4527	23.7839	73.3683	178.647	13.3766	135.541
TCGA-DJ-A4V4	0.152845	0.0582553	41.251	8.46635	0.017035	33.4599	9.12143	4.5749	43.6172	93.8501	26.8715	1.21534	211.743	84.0558	8.13727	0.0626476	110.901	14.3451	98.1501	12.6488	154.685	143.732	88.6271	23.8415	10.2947	21.8428	28.994	52.5401	0.273148	5.8447	0.87061	1.98555	4.11778	261.957	6.78087	0.160948	34.0107	0.259403	20.2334	1.14471	19.6269	61.649	9.90281	83.0994	24.0922	61.1918	102.708	15.8546	96.5586
TCGA-ET-A3DV	0.0913333	0.0104552	23.1347	3.42985	0.00443235	16.746	4.71944	3.27127	21.9908	55.8699	23.4853	1.08196	264.084	110.378	4.36902	0.0481382	79.2227	15.0122	101.586	4.59277	123.563	89.4062	34.819	20.561	7.18429	21.0383	10.1487	27.3934	0.142065	2.22137	0.842956	2.64766	4.62169	69.9704	4.00854	0.0157388	24.9037	0.0299348	7.86822	0.680825	14.055	29.4215	7.63671	51.9046	15.3703	45.8919	104.221	11.906	67.9263
TCGA-EL-A3D1	0.0895603	0.0454491	37.0494	12.5988	0.0123881	33.499	19.9006	4.54857	91.7674	127.022	30.6637	1.61478	288.133	111.755	7.54699	0.0624824	120.862	18.1745	141.501	25.0709	93.3452	82.0648	154.512	29.8347	8.35518	26.0281	46.1878	34.5602	0.175889	6.19323	0.761407	0.965471	4.10186	82.3805	4.03645	0.157763	46.3773	0.141068	22.5968	3.71484	11.5256	46.6184	7.64471	138.792	40.8111	31.6705	128.991	14.228	126.701
TCGA-DJ-A3V0	0.0977807	0.0463894	26.1141	8.07537	0.0116731	31.787	9.25263	5.07311	40.8975	70.2206	25.9346	0.976087	203.044	77.002	8.84636	0.0353426	85.1513	13.5692	95.9531	12.5671	97.7127	138.156	73.4756	20.6858	9.02396	21.7832	28.1529	44.2392	0.206087	4.41906	0.829816	1.69723	3.88319	171.801	3.89195	0.113761	34.2565	0.190359	18.0813	1.41576	13.3715	58.5049	8.91838	88.7198	26.0985	50.4162	112.389	14.5535	91.5878
TCGA-BJ-A28V	0.0820548	0.00787462	25.6501	2.42862	0.00506318	15.9713	1.71917	3.17398	13.0522	45.8013	18.1709	1.25869	234.736	103.316	3.67451	0.0409403	59.4349	13.2961	88.7093	4.11701	58.6697	72.9747	20.207	14.0085	5.36013	18.2368	5.18314	18.8066	0.114689	1.46066	0.816392	2.4712	4.86027	60.2579	3.05322	0.0165408	17.0259	0.0224461	6.07413	0.563967	12.3905	32.4795	5.94357	39.3178	8.48931	42.8282	86.0151	14.4931	53.1539
TCGA-EL-A3T6	0.0337324	0.0119964	6.98636	2.87165	0.00707421	28.3041	3.79875	2.40152	17.3188	37.7371	15.5631	0.618874	124.796	56.6935	8.99727	0.0225153	65.8766	10.3004	67.8699	2.95105	90.6584	86.4571	26.2594	13.8337	3.7416	17.889	12.9763	27.2687	0.135451	3.41496	0.686458	2.24862	2.73377	36.1011	2.70908	0.0274792	15.2866	0.0595917	9.68167	1.53352	5.72859	24.8842	8.54664	53.8099	14.224	37.6452	56.9341	15.2743	37.1584
TCGA-FY-A40K	0.0343195	0.00836748	8.70806	1.32997	0.00713636	21.0842	3.68501	3.03928	20.2119	40.014	15.601	0.421258	152.539	86.6135	4.71943	0.0266784	51.0021	13.7004	79.8387	3.76293	58.8188	61.3622	26.4211	15.0561	2.92975	20.3633	11.9926	17.2873	0.122333	2.10073	0.785707	0.737333	3.28277	28.4623	2.93145	0.0239439	11.3886	0.0674218	7.9559	1.53792	5.44109	19.3445	5.82257	47.5249	12.9357	37.4701	51.2544	13.6672	31.2887
TCGA-FK-A3SB	0.0789291	0.0156802	23.871	4.27643	0.0120736	26.7463	8.89693	3.70314	40.2592	73.0006	19.8261	1.08382	208.018	85.8781	6.1598	0.0434313	68.7569	12.516	97.8347	5.66491	104.568	91.266	43.7683	17.2672	7.18139	19.1119	21.0359	33.4834	0.156913	3.77004	0.825134	1.21835	3.97249	88.3646	3.27309	0.0504864	21.8512	0.102861	15.7765	1.1399	12.1987	47.5103	6.12444	70.8531	11.8478	47.5212	99.7064	17.3814	68.957
TCGA-DJ-A13S	0.305641	0.0532466	80.3674	14.7165	0.0189772	31.8245	7.3081	5.73887	30.0555	133.446	26.3059	2.1963	230.086	71.1585	7.23175	0.13354	104.71	12.9314	90.4849	11.2951	116.26	155.589	75.5159	18.5842	13.7589	19.048	23.2352	98.028	0.41295	7.59441	0.913657	1.95368	6.27421	251.069	17.5288	0.132456	29.082	0.171544	15.0904	1.05001	37.2626	49.5195	13.0282	75.4194	20.3838	55.3348	145.552	18.2295	113.882
TCGA-EM-A3SY	0.681899	0.134104	67.4368	44.8545	0.0232979	33.9743	7.4516	7.32793	35.8154	205.682	33.995	4.8734	190.53	51.321	15.4835	0.231279	135.202	11.097	71.1511	30.1389	112.384	692.211	160.489	29.6087	18.5382	17.3294	50.7776	117.186	0.566169	25.753	0.834232	4.21279	5.10696	1007.64	33.3327	0.321451	40.5574	0.310229	11.8246	0.607867	79.529	53.5696	24.2867	116.714	39.2817	60.2819	240.543	11.8965	221.845
TCGA-EM-A22M	0.0345275	0.0495044	8.46049	7.1958	0.0124456	30.1483	6.86444	4.55763	66.1895	53.7895	26.7274	0.776147	158.843	53.2678	9.17921	0.0301452	83.6139	12.1007	75.4736	17.5237	61.0373	85.3851	98.3593	18.4268	4.19021	21.6137	36.2976	63.826	0.318717	8.31593	0.788186	0.883638	2.66746	146.872	4.57675	0.193578	29.1066	0.281007	19.4257	2.14	4.54041	35.0157	9.12493	157.305	33.5998	35.4654	67.7925	10.6192	61.3852
TCGA-EL-A3CX	0.120449	0.0125272	21.3561	8.57616	0.0086319	36.9287	4.92684	3.86241	18.8535	95.0967	21.944	1.08562	271.516	116.431	6.901	0.0589936	46.9855	18.9314	120.594	6.13572	74.2196	83.534	22.4531	31.4785	4.18953	23.8413	14.1235	21.1466	0.183711	3.36653	0.808245	9.48806	3.11866	58.0547	6.70467	0.0329837	29.5954	0.056363	5.33521	1.80922	10.39	43.88	7.00665	41.5333	19.7634	47.519	55.2656	24.4391	80.0301
TCGA-BJ-A0ZF	0.12866	0.0189101	49.2782	7.10029	0.00807175	26.7546	8.75467	4.48302	32.1375	85.6282	22.1063	1.71844	232.03	96.0589	5.04459	0.0630554	77.4411	14.7795	102.896	8.02416	52.0384	121.359	43.1808	20.701	8.61068	21.3965	15.8369	30.3047	0.193762	3.57001	0.787375	3.29638	4.46291	50.5156	5.11315	0.0327178	28.0518	0.053805	8.85638	1.26148	19.3172	29.9515	8.43052	63.0128	18.1991	38.5813	148.798	12.884	77.2564
TCGA-EL-A3T1	0.0365419	0.0146584	6.20459	3.50996	0.00897086	26.718	4.19064	2.82893	18.4516	32.7688	16.1462	0.541318	116.286	46.1257	7.25317	0.0210841	48.1801	9.57293	66.0443	3.40455	63.0185	81.3047	21.3012	12.3511	2.3042	17.1272	13.1922	32.9985	0.164133	3.12686	0.694631	2.02711	2.41141	56.4497	2.57439	0.0369784	15.8328	0.0792999	9.76547	1.68989	6.41029	29.5202	7.48852	61.0244	12.8254	39.6415	59.5593	14.1323	37.4802
TCGA-DJ-A1QQ	0.152004	0.0302133	47.5323	7.56899	0.0156705	21.1979	6.90919	4.82854	72.8541	86.1369	21.1431	1.41716	188.151	86.5191	3.8066	0.0418708	95.372	13.0406	85.1104	7.17211	103.764	133.909	52.3658	13.337	8.139	19.5187	21.3392	47.1852	0.211627	3.14961	0.899698	1.70241	5.15441	265.857	3.28037	0.0952165	28.8992	0.159719	20.6618	1.02028	26.244	80.3643	5.16607	113.558	13.819	49.1681	134.481	13.2128	102.757
TCGA-DJ-A3VK	0.0544565	0.0124676	23.6596	3.19537	0.00923308	35.9382	5.14621	2.88551	14.9574	69.722	15.8476	0.998016	196.978	94.4948	7.57896	0.0500072	84.5563	13.1722	80.5502	5.13188	90.2206	85.2453	49.6943	16.3284	5.35069	19.0846	14.1952	21.6494	0.14103	3.32492	0.748894	1.27182	4.03599	38.6179	5.88267	0.0293211	15.0523	0.0502737	8.12712	1.0272	7.77478	30.3336	9.37481	48.2768	10.7795	44.1271	71.1281	20.5497	50.7359
TCGA-ET-A39R	0.0237362	0.00740698	6.53208	1.73048	0.0053377	19.3951	4.27235	3.48874	26.805	37.5608	16.4968	0.437116	154.355	62.0472	4.54006	0.0259345	42.5188	13.1676	93.6066	3.36572	60.7935	56.5777	31.6412	14.3426	2.16908	21.1579	13.376	22.4198	0.14031	2.95398	0.720136	1.28655	2.67768	24.8236	2.8564	0.0232918	13.8012	0.0646703	9.85633	2.5656	3.94841	17.4918	6.42728	56.587	13.4487	30.1281	46.1889	11.4802	35.3478
TCGA-J8-A3YG	0.119606	0.0349361	32.0919	8.59513	0.0177565	20.3736	4.74992	5.12855	56.6647	82.6083	24.7191	1.06067	197.873	85.4795	4.68343	0.0553568	100.711	15.5015	101.24	8.95338	81.1791	113.484	75.6276	18.2752	8.47625	22.234	31.7317	57.6599	0.360466	5.03713	0.953908	1.4425	4.97992	189.218	6.22482	0.121269	26.4861	0.218745	19.2302	1.7763	16.6344	51.2658	7.59131	88.8724	23.1569	47.6895	109.451	11.5697	84.2181
TCGA-EL-A3T8	0.109739	0.0179547	34.3109	5.30998	0.0094013	27.4356	5.51422	3.68539	17.3434	59.453	19.229	1.62451	182.908	91.2235	7.42111	0.0413044	70.9979	12.8833	76.6889	6.02407	134.956	136.5	31.5324	18.5524	7.22088	18.8039	12.3615	27.764	0.153759	2.70817	0.774455	3.56729	4.66479	105.642	5.7269	0.0358999	22.4415	0.0626478	9.70582	0.865577	15.2287	50.5456	7.35801	50.4659	13.8729	50.2057	98.367	16.4744	64.0612
TCGA-EM-A4FR	0.0440153	0.0332857	13.5014	4.82725	0.0120267	36.6433	5.27968	3.35365	32.4757	65.9175	25.0075	0.751032	226.7	96.4701	8.00282	0.0366645	84.0289	14.3975	79.527	12.0022	67.8014	82.3392	99.8608	20.7271	4.49007	21.3837	19.281	30.532	0.169059	3.45639	0.88032	0.711733	3.40483	66.5725	7.67628	0.0655398	22.8246	0.117801	13.194	0.903938	4.72168	21.5058	13.3415	86.8983	26.1879	52.6486	48.6093	19.3578	37.7989
TCGA-EM-A2P1	0.0731718	0.0415451	13.113	6.28029	0.0169856	23.8416	5.46536	5.57387	58.349	66.3768	23.093	0.886432	123.425	50.7945	5.84284	0.0497134	122.051	10.5203	68.6722	9.58021	128.227	189.911	75.7108	15.0653	7.21373	18.6882	42.9559	94.526	0.475795	10.3668	0.818303	1.31914	3.77136	366.203	8.96106	0.159966	27.8067	0.307603	22.1327	1.23411	11.6377	50.9388	10.3574	127.378	21.831	46.4355	99.2019	9.30211	82.724
TCGA-ET-A3DT	0.0309506	0.0200658	7.34559	2.55381	0.0100229	19.2755	3.47974	3.55103	46.1443	37.16	19.9607	0.499196	117.246	45.6101	5.28853	0.0237345	53.6488	10.1744	65.0845	6.09223	65.3811	82.3413	37.7963	13.0048	2.18103	19.5438	19.2633	45.7893	0.267755	5.07649	0.803283	0.901014	2.32866	118.385	3.94463	0.0806696	15.8353	0.238583	14.0275	1.96987	4.58956	24.4042	6.24057	92.8116	17.6916	38.6932	48.5807	8.48968	39.3252
TCGA-KS-A41F	0.118921	0.0415115	45.2262	8.66585	0.00825593	28.2263	9.67764	3.39371	42.6223	108.745	28.1763	0.952541	294.614	108.676	5.94625	0.0575937	98.8408	18.2907	129.031	16.6638	205.558	104.599	172.225	34.5957	6.35639	25.7663	21.1062	21.5233	0.107831	3.28333	0.759699	1.16191	3.18576	148.354	3.56572	0.0816411	43.4836	0.109943	15.1872	2.31163	12.5718	41.2028	8.32509	85.1449	41.344	33.6293	89.1726	10.9822	102.611
TCGA-DJ-A3V7	0.108497	0.0353188	35.4286	7.70052	0.0119756	28.02	9.02187	4.90912	46.917	109.705	26.8524	1.26712	217.679	98.4142	6.72796	0.0842133	137.892	17.0254	119.366	8.58116	249.209	138.503	102.249	24.3422	12.1081	23.0443	37.5686	62.4071	0.260154	5.43358	0.855537	1.99364	5.07915	166.03	6.79134	0.0838327	31.581	0.1592	20.2505	1.72868	16.7117	57.628	10.5999	78.7929	26.837	55.1582	109.566	13.8918	107.981
TCGA-ET-A25O	0.178759	0.0380539	62.8064	8.20678	0.0146506	28.4092	8.72332	4.91615	45.2117	136.364	40.5686	1.79539	298.71	164.573	5.76753	0.120366	189.778	20.904	111.393	7.95898	319.955	158.136	76.1642	28.5304	12.0636	24.2473	27.0605	75.076	0.259866	4.31545	1.10653	2.92453	6.93817	229.155	8.5613	0.0539546	26.5064	0.232506	18.8129	1.04603	31.2299	71.6792	12.1399	72.6413	28.1414	105.706	88.6551	16.3833	119.593
TCGA-DE-A0Y3	0.20379	0.0478224	84.5341	11.8248	0.0151177	21.1751	10.1753	6.02714	85.7479	125.136	34.8348	1.93176	223.776	104.594	4.28381	0.0879895	151.679	16.8227	110.794	9.66421	271.646	191.672	102.025	23.815	15.6583	22.4606	36.2488	94.1564	0.348958	6.35449	1.0258	2.27734	6.33008	540.002	7.64368	0.144675	31.4656	0.340338	26.7795	1.43202	35.2951	101.247	9.03182	95.7578	29.4543	68.8475	186.407	12.0467	146.919
TCGA-H2-A3RI	0.0876614	0.0151947	18.6857	3.11776	0.0103263	25.0489	2.9208	3.6291	16.2668	45.2514	17.8172	1.09166	175.128	88.7037	7.58531	0.0384357	69.1286	13.1871	75.0167	4.42714	133.314	124.207	20.3061	18.5512	5.14193	19.2295	8.43583	21.9883	0.150699	2.31695	0.764586	4.11662	4.54451	72.9586	5.30914	0.0337448	19.7514	0.0544743	8.23653	0.932196	10.9512	38.6396	6.02316	43.838	12.3782	51.5303	81.6168	16.4451	51.4498
TCGA-FE-A235	0.0506991	0.024481	15.3232	6.62791	0.0100446	36.0772	19.7358	3.17113	64.5638	71.4507	21.5597	0.998427	228.035	90.9308	9.65978	0.0373482	92.4632	16.1334	124.68	9.5724	128.571	65.7428	73.9474	23.9013	6.37126	22.8972	45.6517	37.2042	0.168914	6.82842	0.720044	1.16791	2.72675	42.1043	3.81711	0.0863279	34.1543	0.116255	17.0641	2.86369	7.03291	40.4513	8.01509	79.3333	22.3108	37.986	92.994	18.1595	68.2324
TCGA-DJ-A1QG	0.147737	0.115201	34.639	13.5873	0.0304465	34.7434	8.61428	6.63958	52.7593	114.668	30.2975	1.71628	200.925	65.8614	8.81478	0.132395	127.771	11.3381	71.2379	17.6575	71.0377	204.312	98.1366	17.7513	12.473	18.0042	37.7047	118.886	0.634509	15.6373	0.960363	2.21665	5.42798	375.096	19.6468	0.331372	38.5886	0.319601	17.0658	0.473112	17.6934	53.8516	16.0466	105.41	22.2691	74.8987	168.882	13.0659	107.642
TCGA-EL-A3CZ	0.10552	0.0142536	41.4233	3.69561	0.00921295	21.4965	4.06372	3.33262	20.5518	70.4993	19.9093	1.88529	171.233	77.5596	4.6345	0.0614501	70.1204	11.8908	68.5159	4.01173	112.038	117.258	35.1536	16.1283	5.62883	17.5522	10.2067	36.4731	0.173284	2.93848	0.81963	1.84707	4.75816	119.196	8.31383	0.0286485	17.383	0.0701911	9.11147	0.776593	18.3461	40.5511	8.12284	54.0816	12.5193	64.7574	100.177	14.2425	76.9905
TCGA-EM-A3ST	0.0711821	0.0123774	17.7645	3.29834	0.00563351	28.5993	7.1739	3.7469	15.4631	60.3996	17.8623	1.29538	210.729	98.4973	8.86283	0.0608151	82.7813	14.8998	97.3182	5.98362	114.137	122.598	40.2823	23.0057	5.38995	20.6742	10.0819	14.0995	0.0994861	2.65751	0.685115	3.51134	4.5272	46.3312	9.15296	0.0217608	23.9633	0.030471	7.25245	1.23969	8.1533	26.296	7.83063	44.3085	16.3546	36.7944	102.29	15.2598	61.2363
TCGA-BJ-A4O9	0.155369	0.0204848	78.0185	6.17525	0.00896254	28.4159	11.8036	4.7977	39.8217	132.28	23.2195	1.24794	273.932	125.13	5.59128	0.1054	164.492	18.3462	116.118	5.72684	425.185	137.21	86.7488	23.3068	13.3352	21.7492	25.3492	55.8943	0.20711	3.47445	0.877605	2.45685	6.15356	108.779	8.89041	0.0495061	28.7048	0.106842	15.6745	1.02013	25.0591	61.6104	10.4406	52.6441	16.5739	57.0244	158.417	15.6859	117.346
TCGA-FY-A3R9	0.177328	0.0629233	32.5269	12.3327	0.0154501	30.1465	9.83798	5.99415	34.4219	94.4892	32.6196	2.49285	185.277	63.1131	12.0552	0.112421	97.7678	11.0685	67.3882	11.7102	103.46	245.381	78.656	26.4488	8.6747	17.8897	40.5083	87.6271	0.348578	12.5193	0.825782	2.27941	4.26573	375.63	23.3669	0.120172	41.607	0.190723	13.5367	0.580544	21.7028	39.3306	16.1593	85.1045	32.6326	79.3949	189.647	12.96	99.4924
TCGA-BJ-A0ZG	0.0620529	0.010467	23.9813	2.55618	0.00684768	20.9826	3.86339	3.27761	15.1523	42.5952	16.6282	1.21078	182.416	75.9599	5.17364	0.0416378	44.3353	11.3829	70.5866	4.52731	39.3461	79.4678	22.0668	13.5731	3.48171	17.5053	6.90255	17.6111	0.124089	2.06841	0.76303	2.49223	3.62037	46.5704	3.63822	0.0260615	16.4223	0.0362686	6.71609	0.820815	8.62618	21.5769	5.84068	39.8966	10.4327	41.9732	83.6661	13.1231	49.9272
TCGA-EL-A3CY	0.0229989	0.00579578	2.4465	1.04986	0.00586266	15.125	1.78377	2.33221	10.9801	22.8961	9.1751	0.214581	81.6294	30.3904	4.08267	0.0105782	26.7222	6.82307	57.0625	2.5819	14.733	52.3902	15.6899	7.24972	0.986096	14.8901	9.70092	16.3984	0.149177	2.38387	0.647496	0.468384	1.583	18.9385	0.642071	0.0247251	7.01089	0.0589241	5.67811	2.19413	3.83462	14.9885	4.7003	56.2831	7.22778	20.9808	30.3101	8.12372	22.2817
TCGA-DJ-A3V8	0.144628	0.037157	39.6627	8.10926	0.012054	28.5463	11.2912	5.47908	56.4821	105.692	27.5814	1.36032	213.775	89.9258	6.91353	0.0558487	151.952	15.3463	112.059	9.53084	260.405	149.274	109.532	23.5739	15.7287	21.4676	43.5564	70.3376	0.245607	6.1738	0.863779	2.1541	5.26913	240.419	5.76291	0.0993546	36.9238	0.187506	22.7601	1.11942	20.7735	68.2705	10.9049	94.0902	23.0222	57.9952	156.623	13.1756	127.823
TCGA-BJ-A18Y	0.08614	0.0185392	32.215	4.42393	0.011026	29.0295	4.79743	3.1781	21.5288	66.6967	17.7705	1.67738	206.516	90.1417	5.99088	0.054912	72.286	13.0351	74.4286	6.41076	71.0449	103.267	36.6693	15.4682	7.08181	19.0625	10.2097	24.839	0.144212	2.41168	0.779929	2.12182	4.9988	62.585	5.54659	0.0356191	23.3779	0.051937	9.03142	1.13316	11.8254	36.8144	7.78347	59.946	12.688	43.192	92.2163	19.3932	65.5369
TCGA-DJ-A2PX	0.0554127	0.0135658	12.3135	2.43015	0.008843	25.1158	4.38735	3.03556	22.4394	44.1728	16.2584	0.525628	133.03	58.1505	5.41274	0.0266384	55.6194	10.9437	73.7433	4.73872	73.357	80.1579	35.2189	14.6274	3.13874	18.6313	10.6886	22.1857	0.125342	2.61548	0.692121	1.41752	2.43801	61.3451	2.20838	0.040091	18.3468	0.0762237	10.9578	1.51428	8.99742	27.9838	7.26104	59.0399	12.0269	35.1325	48.7069	11.3111	43.307
TCGA-E8-A44K	0.104072	0.0459578	25.5957	8.87254	0.0123862	25.1743	8.02501	5.48275	54.2488	83.1569	32.6518	0.960517	204.413	78.0064	7.02445	0.0439277	98.6795	15.1289	104.093	13.2399	95.5194	145.022	102.036	22.884	8.60755	22.825	41.887	62.574	0.296912	7.03563	0.91594	1.25281	4.2937	288.93	6.03903	0.142511	32.4446	0.288098	20.9919	1.52331	14.3861	51.0863	9.42113	101.374	35.3333	52.2392	117.923	11.5019	101.26
TCGA-EL-A3GR	0.126297	0.0208928	30.2986	6.81091	0.013333	21.9166	6.40593	4.23757	56.9003	66.2802	19.4702	1.25628	157.513	77.1854	4.689	0.0256868	85.1559	12.0392	86.2568	6.04007	110.101	107.963	41.3724	13.9362	5.53334	17.8632	27.1973	48.4311	0.235274	4.07712	0.844608	1.34697	4.1628	130.528	2.13222	0.067678	21.481	0.163796	17.6837	1.08808	21.8142	65.6025	5.24642	87.9623	12.646	50.048	123.282	13.3722	74.6488
TCGA-EM-A22L	0.0807372	0.0123119	35.1102	2.87768	0.00858967	22.9292	3.54051	3.15781	17.318	67.8587	21.7089	1.79172	204.961	90.9796	5.30577	0.0533541	81.9481	12.6918	81.0951	4.26596	49.469	97.6094	34.9715	18.2365	5.37963	17.6456	10.5641	29.764	0.125103	2.2509	0.790721	1.45351	5.0876	71.7679	7.14568	0.0202841	21.2341	0.0372813	8.43734	0.701174	12.9273	29.6085	6.67586	59.3484	11.7802	61.8162	99.8747	16.6683	67.7066
TCGA-DJ-A13M	0.0694688	0.016499	31.0518	4.98174	0.00645325	34.2791	10.9602	4.09885	32.1083	94.8649	26.093	1.70367	281.04	116.459	8.49505	0.0812646	109.624	17.9293	121.877	8.20089	81.8861	109.182	77.2169	28.855	8.63686	22.7479	19.7958	26.9009	0.120481	3.3635	0.745673	2.00413	5.05214	51.5439	6.95099	0.0266924	40.1719	0.0379154	11.1403	1.72433	9.97234	26.2328	9.56444	78.2651	23.6878	45.2884	110.991	17.7609	84.2528
TCGA-BJ-A0ZE	0.318252	0.0732211	51.8272	16.0728	0.0146577	31.3659	13.2996	6.10513	55.0389	128.606	34.1876	3.2875	244.422	66.0104	8.94389	0.148758	109.621	12.8504	85.168	27.1187	78.2788	187.678	131.567	27.2736	16.9031	19.6433	25.4147	69.7318	0.294454	6.77573	0.808611	1.71335	4.93601	432.952	22.5158	0.177461	50.1496	0.173086	16.8605	0.912524	35.1317	51.1428	13.9591	123.148	32.6803	53.774	205.378	13.3989	161.597
TCGA-EL-A4K2	0.0526972	0.00987806	11.7539	1.9485	0.00534829	19.5913	2.53351	2.62737	10.3631	43.4337	15.5028	0.691057	145.483	67.6027	4.94453	0.0302584	41.1374	12.4489	75.233	3.57931	47.3913	66.0011	26.3183	14.4225	3.13759	19.0561	6.81654	15.6308	0.0925946	1.6602	0.679988	1.02258	3.28362	27.7004	3.37517	0.017265	13.4894	0.0350471	5.37535	1.70273	7.6722	18.0661	6.28479	45.7786	14.0125	30.7691	50.0237	12.93	38.7808
TCGA-DE-A4M8	0.0330562	0.0243884	7.03988	3.2092	0.0104957	25.0311	2.98592	3.51882	33.8983	35.801	19.9917	0.513701	128.678	44.6414	7.40777	0.0243071	53.3762	9.75389	60.7922	7.47952	36.1733	68.5982	40.9322	13.742	2.20177	19.0121	15.7008	35.8311	0.212217	4.68346	0.753245	0.877814	2.1862	77.2256	3.81364	0.0819949	15.8449	0.166241	12.3528	1.92953	4.65897	19.2476	7.5872	81.9212	19.7127	32.8846	42.4799	10.5574	31.767
TCGA-FE-A3PC	0.0892257	0.0685416	17.8186	7.44555	0.0160437	33.8853	8.74116	4.37911	48.9725	76.8057	32.1521	0.743889	203.168	87.2546	9.34747	0.0349726	91.8373	14.5942	97.9644	16.0866	149.474	127.748	127.07	27.2568	8.9614	22.3265	40.408	55.4455	0.234667	6.3597	0.872965	1.05001	3.29266	208.627	4.23217	0.196286	36.659	0.282826	23.1936	0.928972	9.27701	42.4657	12.8488	103.23	33.5706	61.9135	71.1829	13.1276	60.6267
TCGA-EL-A3T7	0.0971746	0.0292661	33.4045	8.62425	0.0145698	30.3238	13.0984	5.15082	92.2834	104.056	22.5269	1.36118	200.999	98.5821	7.07551	0.0602594	125.351	17.0222	113.066	9.23827	202.939	127.497	78.8449	20.6725	10.2382	22.1106	42.714	53.875	0.26266	5.53123	0.891238	1.31131	4.99363	167.027	6.95537	0.0990877	35.2937	0.182694	25.2716	1.70107	17.2648	66.4766	7.6796	110.548	19.4972	56.7511	160.645	17.5029	105.082
TCGA-BJ-A28T	0.0321768	0.0123956	4.55562	1.99327	0.00785086	18.2852	1.92143	3.08751	17.7623	23.0858	15.9398	0.447759	102.794	40.0806	5.47292	0.0194051	34.893	8.80715	54.8068	4.08334	45.7445	77.3288	17.2924	10.0689	1.47333	17.7975	8.38256	22.7832	0.159021	3.09841	0.688296	1.46656	2.2126	59.0324	2.96782	0.0406416	12.5373	0.0967754	7.81181	1.66594	4.80603	18.378	5.58727	57.8564	13.505	31.4752	36.7141	8.50403	28.1279
TCGA-DJ-A2Q3	0.0935556	0.0247508	19.7987	5.72612	0.0139108	22.3018	7.15439	4.8479	42.846	65.1754	18.1652	1.01785	130.215	51.6512	5.18549	0.0464142	84.2572	10.747	77.9548	6.95354	144.276	131.886	55.7246	14.0105	5.30276	18.373	29.8402	56.3232	0.294287	6.66003	0.759969	1.6412	4.04648	208.746	5.92633	0.0844858	23.7829	0.19814	16.5699	1.57365	15.6723	48.8483	8.27844	90.7061	14.3692	39.539	101.839	10.4573	83.5491
TCGA-EM-A2OW	0.261492	0.0568721	43.325	12.3487	0.016335	28.9751	8.68831	6.20223	30.522	91.4231	27.8209	2.0477	176.759	55.9287	10.027	0.0744607	70.2716	10.5333	68.9609	10.5395	73.8642	245.874	65.43	19.0439	9.27798	17.3799	22.0119	78.2143	0.304506	9.51311	0.818152	2.62893	4.77209	278.791	12.6023	0.146327	40.0529	0.18235	12.3879	0.631784	32.7956	43.9454	10.7266	75.5191	23.9677	65.8421	188.048	11.5475	103.095
TCGA-EM-A4FF	0.0862031	0.0362181	24.4759	6.71456	0.0125356	25.1584	8.20338	4.85127	46.4319	81.015	29.3893	0.84564	182.785	78.3716	6.70482	0.046498	100.648	14.6222	98.0985	8.61392	145.243	109.259	80.9683	21.6057	8.60377	22.5488	32.8496	58.7041	0.260517	5.76087	0.898084	1.4578	4.11519	157.488	4.72401	0.106378	25.508	0.235599	19.7842	1.66013	13.5174	45.9855	9.83626	88.7334	28.1048	54.307	95.7684	12.8495	76.7303
TCGA-BJ-A45G	0.0762721	0.0146102	25.0104	3.56379	0.00880094	27.1007	3.89921	3.33173	18.2516	63.0362	18.2081	1.5112	189.274	87.4399	6.90841	0.0542921	78.588	13.2263	79.186	5.58049	63.3995	98.7799	39.5159	17.8931	6.61604	19.202	12.5478	26.3975	0.140613	2.6431	0.772872	1.73826	4.31202	75.0194	7.23713	0.0348265	21.3692	0.0490296	8.8816	1.10847	11.1631	30.7474	8.13585	48.1137	14.4958	46.7583	83.3616	17.2598	64.55
TCGA-CE-A13K	0.0945283	0.0135865	32.1506	6.24589	0.0110341	33.3444	7.84186	4.4606	41.397	71.5616	19.25	1.28419	208.713	77.8276	5.82868	0.0405433	58.7437	12.7427	97.2348	7.41948	99.6711	88.1403	49.3417	18.6097	6.23871	19.3486	15.272	32.6097	0.177094	3.29445	0.783266	1.10425	3.91757	59.5765	4.70285	0.0558466	18.8025	0.0844415	14.7332	1.87852	14.8442	52.4297	6.79388	70.7614	13.5812	40.5639	79.2036	21.3528	65.75
TCGA-FE-A230	0.0842998	0.0618009	24.4682	10.2406	0.0186525	20.8226	7.35607	6.59744	104.92	74.5141	37.6827	1.18909	184.009	74.7726	5.38551	0.0527371	94.2	14.8492	87.9148	10.9149	151.536	168.635	79.2035	21.0847	8.04215	23.0618	39.7129	122.429	0.440977	7.46304	0.985963	1.84424	4.20374	538.014	7.14033	0.22142	37.1552	0.411202	26.1004	2.14591	15.1516	61.1316	7.87958	132.154	37.9777	57.8417	90.9419	11.1514	102.272
TCGA-DJ-A2Q6	0.090567	0.0145937	18.6417	3.5894	0.0108149	23.8511	6.60254	3.70963	29.2003	66.7802	17.3039	0.998921	155.902	71.4158	5.14082	0.0329878	71.2909	11.4073	80.1381	5.08584	145.674	114.384	34.0195	14.0877	5.5112	18.63	17.518	35.6057	0.186055	3.14944	0.797311	1.80365	3.44958	119.413	3.36386	0.0404718	18.6768	0.1065	14.4468	0.880136	15.7472	63.3122	7.3297	65.5201	10.5281	58.618	76.0226	15.2235	63.5534
TCGA-EM-A3FO	0.15333	0.0343549	41.1427	9.89197	0.0120431	29.5878	15.4342	5.19086	123.441	128.94	31.0217	1.05189	237.673	126.382	5.68562	0.0470497	247.187	17.661	123.243	10.9274	223.031	149.291	145.729	26.4404	18.4639	23.0204	65.4948	62.7044	0.313248	7.45775	0.963827	1.16462	4.83472	222.28	6.35055	0.103483	34.5803	0.262391	32.4651	0.866169	20.0974	71.6747	9.90669	163.744	24.6302	67.6342	183.946	13.1187	116.33
TCGA-DJ-A2QA	0.0848702	0.039621	21.0874	8.66914	0.0092669	41.9741	15.5037	4.49391	49.4366	87.9835	25.2318	1.24163	281.712	95.1285	8.89581	0.045861	82.4457	16.3381	132.405	19.5891	156.175	94.1507	110.804	30.6667	5.53113	25.1039	22.8889	21.0231	0.110939	4.29484	0.693973	1.59299	2.84343	76.107	4.62796	0.0919415	48.9782	0.0894241	15.8862	2.59842	10.0076	36.7912	9.6236	83.3679	30.6505	34.0297	107.997	16.0729	95.2296
TCGA-EM-A1YB	0.414557	0.187437	43.6469	37.9449	0.0302722	29.9352	11.8153	7.75009	36.2306	130.744	32.4675	2.45985	211.355	51.3694	13.6724	0.212304	101.212	11.4505	73.383	26.1125	63.2452	276.412	99.6509	24.7207	13.7557	17.7783	64.2745	177.035	0.838031	51.0927	0.935697	3.60408	4.78193	1197.27	39.1682	0.784292	60.0867	0.561357	12.0236	0.44601	39.1989	61.0341	27.4671	82.4852	40.875	79.8102	259.388	8.77971	149.962
TCGA-DJ-A3UZ	0.0511055	0.0128884	13.8987	2.3596	0.0087509	22.844	3.56026	3.22425	18.7592	47.4	15.2047	1.01288	147.744	76.0917	5.33213	0.0451709	63.7857	12.5731	74.9752	4.58933	93.639	96.1447	29.6077	14.9919	4.60987	19.2204	9.15609	20.355	0.125032	2.32621	0.739585	1.86764	3.35793	58.4673	5.24223	0.0323637	14.7178	0.0525433	9.31294	1.50654	8.7741	28.322	7.79802	47.4307	12.4023	37.7178	47.4989	15.5394	48.4215
TCGA-DO-A1K0	0.128341	0.0333575	45.5224	6.36237	0.0155397	20.7459	6.29068	4.11304	45.1055	98.9198	29.211	1.35437	206.369	98.6196	4.02124	0.065763	111.517	15.028	95.3224	6.65551	166.943	133.596	64.9289	18.8552	8.36425	20.9062	26.5385	72.0593	0.316971	4.47894	1.00777	2.00471	5.78854	294.683	4.77596	0.0889567	22.8615	0.265571	19.2104	1.0901	22.3119	63.6833	9.27078	81.1854	21.6935	73.9614	90.2379	12.9287	97.353
TCGA-EL-A4KD	0.0540111	0.0147712	15.4769	3.37732	0.00867332	26.7082	3.74938	4.07813	26.5219	45.2596	17.2025	0.747991	169.615	67.3662	5.91597	0.0271448	50.0716	10.7535	74.7836	5.94348	36.0923	77.8895	40.6649	14.4545	3.91101	18.4069	11.7159	25.7859	0.129398	1.99828	0.751367	0.860592	3.18004	52.0666	3.01865	0.0406326	19.8361	0.0589346	10.6467	1.10137	7.32303	27.8585	6.40757	64.9451	13.1467	39.8102	71.9347	15.9147	40.5636
TCGA-DJ-A3VG	0.0934276	0.0228211	27.1974	4.6665	0.0100816	31.8112	5.50654	3.71863	23.264	66.0034	19.9257	1.24443	191.436	77.8138	7.27435	0.0436778	76.696	11.568	75.2764	7.82971	71.8284	117.956	56.8748	17.7294	7.78735	18.7911	15.2796	25.0867	0.149823	3.40308	0.782399	1.36904	4.13046	87.8747	5.64522	0.0493042	24.5255	0.063409	12.2081	0.764287	11.8872	36.1379	9.01994	61.8908	15.2318	45.4379	102.219	16.5925	55.5555
TCGA-EM-A4G1	0.0721017	0.0177358	17.8395	3.57668	0.00763566	24.7784	6.03339	3.81385	19.9097	65.3488	23.2067	1.34054	163.284	78.6902	8.74814	0.0582391	77.3398	12.7895	83.7419	5.83891	87.7662	136.529	55.8369	22.3091	6.01624	19.7046	24.7679	42.8766	0.207497	4.87121	0.786516	1.24922	4.06077	159.529	7.95764	0.0422491	24.8925	0.122392	8.59988	0.866971	10.96	30.9467	8.73298	52.9926	23.2203	51.3734	109.127	12.8159	77.1959
TCGA-ET-A3BO	0.0505405	0.0122029	16.0806	2.7732	0.00739914	18.301	4.4055	3.68472	35.1744	56.1804	20.3795	0.675293	152.891	71.6994	4.21864	0.0355292	64.9332	13.1591	87.8816	4.36634	89.5083	85.1922	44.8295	15.3989	3.89011	20.5859	20.3802	37.3345	0.197917	3.66373	0.810244	1.19118	3.53829	103.793	4.04481	0.0380523	16.5539	0.141627	12.5792	1.96964	9.24154	33.6351	6.0775	73.3328	16.7135	40.1599	76.9684	11.2105	59.8752
TCGA-EM-A2P3	0.0813436	0.0149688	24.2487	4.35356	0.00826537	20.5483	6.90162	3.96534	33.8783	60.98	20.9741	1.08499	175.578	79.2379	5.15688	0.0264342	70.8624	13.0407	96.7619	6.68671	105.844	100.625	46.5252	16.8435	4.5628	20.0089	19.943	34.1873	0.170976	2.98373	0.807473	1.74689	3.92955	127.544	2.33271	0.0369259	21.8742	0.119531	15.8134	1.24126	13.8468	50.8311	6.11682	68.3046	14.3412	49.9866	95.631	13.0725	75.8684
TCGA-FY-A3BL	0.158022	0.0506889	63.5704	9.32153	0.0146092	23.2129	7.86118	4.80198	60.5426	112.922	36.2819	1.67042	228.122	106.817	5.45101	0.10638	131.593	16.1688	93.2974	10.9996	215.39	192.657	99.3958	27.7239	13.3149	22.4422	34.329	79.0777	0.365537	6.81985	1.01994	2.10267	5.0696	394.222	9.44127	0.125581	30.3571	0.321683	22.0965	0.982432	24.2879	63.9046	10.71	79.2868	34.4502	76.2363	119.304	11.4939	117.159
TCGA-FY-A3R7	0.0842523	0.0181181	23.9985	3.86147	0.0116178	23.9799	3.79556	3.43079	27.8759	54.4836	17.7871	1.22676	163.811	78.4177	5.42948	0.0419726	69.8389	12.5121	77.278	5.95801	84.1607	93.18	30.0308	14.3874	4.88739	19.1143	12.6779	27.864	0.164022	3.30856	0.768791	1.85004	3.59542	88.3301	3.94144	0.0465022	18.4189	0.0894465	10.4871	1.14218	13.5822	38.2748	6.60318	62.8615	12.5651	40.7243	72.4875	14.4567	59.5019
TCGA-EM-A2P2	0.0825038	0.0140055	35.2813	6.50679	0.00845488	29.1014	5.82513	4.24294	34.6265	79.6709	21.9324	1.50727	236.799	110.47	6.44807	0.0666435	87.6376	13.724	98.0275	6.3252	71.7084	126.894	56.6118	21.685	5.86568	19.3254	25.4643	51.253	0.215568	6.15624	0.915985	2.09972	5.03878	85.4357	8.14368	0.032276	28.0015	0.104722	15.4279	0.625925	12.1601	31.7432	8.55916	75.4111	11.5963	59.5694	120.196	16.1762	69.2349
TCGA-QD-A8IV	0.0439457	0.0112215	20.3214	2.6113	0.00654117	22.7758	2.40743	2.85626	16.1584	54.1901	20.3133	1.06154	211.593	102.3	5.14816	0.0524052	66.1924	15.2005	81.2143	3.23622	52.0821	65.5881	33.91	17.0172	3.01455	20.1923	10.4919	22.8546	0.132363	2.47768	0.815136	1.24338	3.52075	35.8952	6.31507	0.0209104	14.5459	0.0351599	7.38621	1.36372	6.79639	18.6967	7.37782	48.0187	15.3009	46.8416	49.7467	15.7873	43.0921
TCGA-DJ-A13L	0.0497079	0.018912	9.43984	4.99322	0.00938972	25.3706	5.58847	4.84577	41.7574	62.8404	19.9386	0.636773	147.466	53.5567	7.41693	0.024838	82.5269	11.0376	78.7712	8.58834	89.9254	88.4098	60.4184	16.052	4.5027	19.6713	32.0268	43.5476	0.267792	6.70245	0.761136	1.0593	2.43576	114.392	3.32736	0.0678643	24.3462	0.17811	16.1453	1.7399	6.87916	34.6491	8.74103	92.8416	21.3488	39.644	70.1655	10.7223	53.954
TCGA-ET-A3BS	0.0365966	0.0231989	7.02916	3.32548	0.0113198	27.6214	7.11223	3.90638	42.3804	47.623	19.3953	0.590352	123.45	56.2383	7.45119	0.0388747	80.5602	10.9478	66.0867	7.4074	127.822	115.172	48.1418	15.5062	5.53517	19.2259	25.9807	47.6432	0.26303	6.68009	0.768303	1.35018	2.71809	131.809	5.14678	0.0898605	20.7827	0.177756	14.1708	1.2195	5.4613	30.3635	9.296	94.3379	18.029	41.2953	60.3572	9.33924	47.4153
TCGA-DJ-A3UR	0.0789588	0.018327	31.311	4.07289	0.0101427	28.8899	8.68209	3.28711	31.3804	73.1432	20.5652	0.984086	222.462	115.624	5.55536	0.048494	77.9687	15.8695	100.066	6.32382	190.583	99.4391	52.0621	19.2966	6.05371	22.5778	15.7731	27.5786	0.149274	3.08235	0.844771	1.568	3.58385	78.0248	3.41255	0.0423442	22.4501	0.102518	12.5846	1.31879	12.4427	46.2563	7.38472	53.2005	16.2103	50.8462	75.2016	16.5385	64.8135
TCGA-EM-A3FJ	0.0764116	0.0203146	30.1084	4.54353	0.0105957	35.6824	11.3654	3.6559	37.6834	80.5308	20.3956	0.88049	206.544	103.285	6.21927	0.0416692	105.059	15.1362	102.43	6.91223	253.937	104.308	64.5013	21.0589	7.19902	22.0174	20.3888	29.8858	0.151123	3.24251	0.77559	1.61541	3.61049	70.4161	3.83995	0.0475362	22.8971	0.114827	17.0812	1.37463	11.8985	43.6727	8.50878	72.7329	15.7386	48.7425	74.8134	18.2221	64.0981
TCGA-BJ-A2N7	0.0869861	0.0165081	23.2209	3.72359	0.009714	25.7586	2.85839	3.17586	17.3701	59.3708	20.2991	1.77322	184.238	93.6004	5.99714	0.0674305	77.7843	13.0268	73.4038	4.50593	150.332	124.172	24.5179	17.9503	5.19746	18.7481	9.49395	30.9894	0.169994	3.06109	0.816068	3.28766	4.29965	111.797	8.03181	0.034918	17.4893	0.0607743	9.00558	0.720549	12.5742	38.3617	8.08277	47.2363	12.9637	61.4772	83.6259	14.0585	53.743
TCGA-FY-A3YR	0.172977	0.103432	40.8604	13.6362	0.024298	29.8946	9.55525	6.45727	80.2026	106.358	40.3449	1.56308	191.494	75.2845	7.6067	0.0577681	132.732	13.9393	93.0323	22.5701	172.428	215.32	135.706	26.6323	12.7264	22.2002	59.0746	104.359	0.520794	11.472	0.961651	1.62992	4.23583	565.565	7.67477	0.347417	45.8705	0.481706	34.4587	1.00935	24.0377	79.2326	12.3925	139.092	41.1888	80.8283	145.238	11.7952	125.626
TCGA-FY-A3R8	0.104515	0.0178034	26.1182	5.31153	0.0107682	24.9786	6.77566	4.63326	39.5651	94.9712	22.6028	0.995103	175.417	76.4057	5.44791	0.0481728	129.796	13.6388	96.6569	7.62225	207.317	122.41	82.733	19.2185	7.99234	20.5695	35.3563	48.9786	0.262934	5.41947	0.838368	1.26123	5.02391	136.171	6.33352	0.0522366	24.6206	0.176717	18.5459	1.18828	16.8019	60.8234	9.81534	87.048	19.197	49.5594	117.153	13.5807	91.8106
TCGA-ET-A3DU	0.0466412	0.0443451	9.35002	6.83424	0.0109865	22.1316	5.9166	4.88818	82.6647	47.0378	31.8083	0.578448	156.806	50.9787	6.80186	0.0217853	57.6368	12.7564	83.7654	13.1986	60.8929	94.0945	85.4126	19.9653	4.11662	23.5758	32.41	71.5624	0.318314	6.25911	0.822502	0.793938	2.46676	197.337	3.33654	0.192316	27.1281	0.370148	19.3633	3.15432	6.6133	30.9227	6.86908	146.793	45.0225	39.1234	67.9831	7.77093	66.0057
TCGA-E8-A415	0.0880632	0.0239788	25.7597	5.54435	0.0123016	26.2043	7.60518	4.77473	37.7429	76.9101	23.1122	1.05296	190.26	89.2624	6.86878	0.0568615	112.239	14.886	96.067	7.27924	145.929	129.645	63.6318	20.1625	8.62385	20.8026	26.827	45.4177	0.212477	4.54211	0.848089	2.16422	4.66031	115.467	5.83917	0.0712633	26.1671	0.141433	15.6914	1.24499	13.1757	41.5401	9.03362	70.4778	20.3619	50.5833	102.184	14.9184	78.8602
TCGA-EL-A3GW	0.0965641	0.017455	43.4713	5.65303	0.008528	22.9214	6.07228	4.12774	26.9204	84.5509	20.783	1.84848	216.641	78.8026	4.72144	0.0611102	96.3357	13.5287	91.3173	5.70434	64.6281	101.864	48.347	17.3125	6.30167	18.0935	16.4412	44.4871	0.191631	3.86592	0.803449	2.76162	5.18548	83.9892	6.26254	0.0324808	20.6838	0.054776	11.5047	0.752497	13.9533	38.2189	8.07708	66.4599	10.2169	54.5594	149.953	13.1432	83.331
TCGA-EM-A22J	0.247099	0.0310008	48.2835	10.0638	0.0137253	23.6732	7.50653	5.6052	30.6223	92.37	24.7644	1.4659	188.961	65.2973	5.88067	0.108832	82.07	11.6302	67.8105	7.27701	90.2307	156.781	57.0652	19.0237	7.63785	18.5069	18.4159	60.7957	0.242759	5.52579	0.836606	2.12406	4.62413	182.528	14.4855	0.0764778	26.2171	0.140459	11.1539	0.797594	27.4798	44.2265	9.99869	67.3561	20.632	62.4211	152.027	11.7574	91.4831
TCGA-DJ-A13P	0.101567	0.0160903	28.7971	6.0788	0.00981194	27.7512	9.05944	3.205	32.7134	75.3456	21.0517	1.3083	205.734	105.41	5.99719	0.0585775	104.562	14.9846	88.8901	6.05914	283.855	83.3574	50.5375	19.9177	6.76635	20.9554	20.2894	42.8558	0.160956	3.82183	0.78937	1.79488	3.92805	87.2807	3.86362	0.0386988	27.295	0.104306	13.8774	1.19844	15.9953	70.1445	10.5896	61.8932	14.6586	58.1088	64.0253	15.0241	75.2192
TCGA-DJ-A4UR	0.0803539	0.0708346	22.8495	6.31252	0.0196856	41.253	3.89906	3.47984	25.5288	75.027	25.1348	0.905367	194.945	86.3166	10.88	0.0325287	76.7284	13.953	83.3815	9.95211	50.7171	97.416	71.949	20.8381	6.76505	21.4747	18.4555	36.1269	0.165256	3.72321	0.824634	0.865573	3.14409	82.1283	4.39941	0.138126	23.5445	0.130021	13.4646	1.23581	8.388	27.0031	13.2077	84.7967	25.4129	63.773	51.3499	19.0116	46.4192
TCGA-DJ-A3VL	0.054861	0.0171146	13.6189	3.17128	0.00822521	34.3316	5.64887	3.20889	19.5023	56.1593	15.4918	0.660139	150.644	65.3104	8.43742	0.0461956	65.7206	11.5897	70.0135	6.51496	68.114	86.2331	60.1406	16.2035	6.44895	19.7721	12.8205	17.3056	0.133276	3.73643	0.671144	1.02626	3.09611	40.1072	6.22463	0.0409796	21.404	0.0563198	8.6944	1.54511	7.41268	19.6559	10.5309	57.9031	16.6013	29.7322	66.7812	15.1724	43.0987
TCGA-EM-A2CT	0.133593	0.0102015	61.5311	3.46946	0.00524015	26.6544	8.43891	5.47273	13.1051	102.467	13.7674	1.63125	195.14	67.1591	5.69938	0.0742387	107.484	11.379	91.8011	3.33448	96.0982	196.97	40.9256	14.3364	8.81739	16.2341	12.3734	27.1821	0.112271	2.18103	0.692976	4.12924	7.75826	56.7817	9.30616	0.0187067	24.8145	0.033093	8.98685	0.531862	21.0124	44.3086	7.6733	35.1564	6.62889	48.3968	224.532	15.3697	115.546
TCGA-ET-A40S	0.0585481	0.0148347	17.4446	4.89129	0.0115264	22.6509	4.9167	5.21227	47.8019	80.1846	14.4807	1.12371	171.696	63.6349	4.693	0.0780565	79.5922	13.3015	86.1353	9.06392	90.4932	73.5334	67.158	17.1495	6.90804	19.6363	20.9909	40.7244	0.199155	4.68999	0.733946	1.15901	4.12608	48.9773	13.2218	0.0728189	19.0076	0.089424	14.2733	2.73387	7.56155	30.9118	9.37658	91.4003	14.8434	23.9187	75.6739	14.684	58.3152
TCGA-BJ-A45I	0.0844993	0.03436	17.7838	6.82456	0.0151506	25.2882	5.69566	5.34973	53.4584	71.5805	24.1666	0.785813	168.538	62.2835	6.75963	0.0407191	90.9222	13.4299	98.8734	9.67717	127.379	115.553	87.1086	17.6898	6.59358	22.2903	38.6226	52.3097	0.297049	6.32942	0.846218	1.11618	3.87116	152.008	4.75486	0.12867	27.404	0.217425	23.5702	2.06352	11.6568	47.2175	8.44495	97.8663	23.259	45.8565	100.858	11.9217	80.4055
TCGA-ET-A3BV	0.0975164	0.00929004	16.7224	6.55889	0.00712106	11.878	4.46324	4.42024	55.4665	57.0085	19.1461	0.724408	183.472	58.504	3.36804	0.0119924	47.2169	11.8751	106.228	6.1678	43.8791	68.2148	30.2923	12.6502	2.47119	20.1065	18.998	31.7983	0.201852	2.5553	0.796346	1.96765	3.12094	114.559	1.00139	0.0423802	22.8839	0.1354	15.0536	1.73114	15.2321	75.6559	3.63769	95.5945	13.6234	40.2672	104.074	8.98461	91.4577
TCGA-ET-A39L	0.0719151	0.0114878	22.8022	3.39054	0.00665058	24.2241	3.69178	2.8292	22.7025	53.9608	16.1421	1.15048	175.034	71.667	4.67208	0.0353308	62.1214	11.0891	71.445	3.85543	81.4911	82.149	27.3244	13.2693	3.50297	18.0165	11.2979	28.1094	0.123885	2.57881	0.761276	1.35086	3.12567	55.2968	3.25722	0.0248504	15.2207	0.0620196	7.78569	0.867952	11.3523	34.0576	6.87005	48.5661	9.6138	50.1333	78.984	14.5882	47.253
TCGA-EM-A3FP	0.154338	0.0231494	31.2453	6.77984	0.00885635	29.5882	10.3794	4.4544	29.818	77.972	21.9339	0.993379	184.285	53.3066	7.38125	0.05727	63.1146	10.8855	72.0845	9.65845	56.0371	106.582	64.8716	17.7294	7.06656	19.7152	12.7305	32.1132	0.158705	4.8863	0.681105	1.37881	3.4611	89.8839	5.7554	0.0685955	31.4872	0.0890951	10.4221	1.78164	16.5031	30.6803	9.43155	86.2977	21.8529	33.5447	128.177	11.4064	93.5596
TCGA-J8-A3YE	0.13125	0.0237778	50.7708	6.7563	0.00936774	24.4144	13.5484	5.91621	44.0286	115.993	23.9047	1.1118	235.946	94.9946	5.80449	0.0752924	184.279	15.2259	112.295	7.58301	221.771	171.926	93.4045	22.6956	13.5411	20.0893	32.7497	53.12	0.191906	4.08746	0.863975	2.93168	5.51855	154.095	11.4238	0.0569728	31.6887	0.0934579	18.4088	0.594709	20.3215	62.8434	10.8367	66.078	15.4594	59.132	210.914	14.0096	114.596
TCGA-DE-A4MD	0.110457	0.0285888	33.6732	4.46756	0.00819569	17.3518	11.5925	3.65214	37.7479	103.21	35.0035	0.861989	225.031	139.196	5.5494	0.210395	183.71	20.5002	91.1189	5.12318	180.496	185.146	91.3986	32.9567	14.0918	25.0112	21.6142	56.7826	0.227302	5.69687	0.997193	0.896912	5.69891	177.172	31.8748	0.0519535	21.7704	0.245052	15.2483	1.31344	18.3611	42.7371	9.85051	68.1908	38.8066	92.758	114.904	9.89335	103.392
TCGA-DJ-A3UK	0.0619965	0.0110922	19.8589	2.68995	0.00933685	23.8878	4.65309	3.02811	25.4492	63.1614	17.1274	0.930837	193.873	113.815	4.90126	0.0445789	65.5005	15.6498	92.0568	4.26205	118.698	101.029	31.9246	15.7087	4.55123	20.6096	13.3407	22.8113	0.124191	2.25511	0.830982	1.58217	4.15184	75.3668	3.92081	0.0300034	17.921	0.0710853	10.4311	1.25707	9.41327	37.3896	6.52766	52.8129	11.2201	47.1944	61.0789	16.3706	57.1129
TCGA-EL-A3GU	0.191269	0.0584763	31.1948	12.9968	0.0160207	31.0196	11.6601	6.2694	66.5473	73.674	29.5218	1.36219	198.737	71.9007	7.87793	0.0290684	117.694	13.1086	99.4693	13.1925	112.318	173.614	84.657	20.6695	11.877	20.4271	31.2483	79.0953	0.276685	5.3173	0.864125	1.72172	4.55485	344.426	6.45455	0.16164	34.9398	0.262733	28.1271	1.18829	23.1253	102.5	7.98041	139.819	23.2049	64.8196	146.3	14.4414	104.181
TCGA-EL-A3H4	0.29099	0.105249	53.5914	17.2432	0.0303549	24.5676	12.5998	8.00919	125.016	118.392	37.124	2.11744	194.137	85.9333	5.74943	0.0953313	155.19	14.3483	95.543	10.6305	286.121	357.838	90.6978	20.9925	20.0174	20.7883	51.7301	175.039	0.568634	8.94771	1.02699	2.86198	6.17689	1102.36	7.0135	0.303912	46.1969	0.429056	39.4753	0.91086	46.3462	160.066	10.4702	143.763	28.102	101.48	222.443	11.2977	158.601
TCGA-DJ-A3UO	0.0978424	0.034418	45.5976	8.74596	0.0144358	34.6078	9.99829	4.46264	72.3021	111.404	24.9636	1.84206	251.582	100.73	9.14498	0.0951597	150.294	16.283	111.588	9.96917	186.857	105.484	104.772	21.2812	13.7729	22.1489	51.299	61.3198	0.333164	6.63017	0.878562	1.67721	5.26157	117.404	10.3981	0.109117	31.5649	0.156418	25.5726	1.32513	14.5646	67.8135	7.69911	120.923	19.3381	58.1291	129.244	21.1329	111.088
TCGA-DJ-A3VE	0.0756077	0.0217397	29.1174	4.08138	0.0117475	21.8467	5.82941	4.65891	57.2699	68.5663	20.6289	0.94736	188.868	99.9771	4.24306	0.0341614	106.199	13.9552	96.9029	8.35275	97.287	110.502	51.7386	17.7248	6.26693	19.5036	25.8159	30.8859	0.166999	3.34271	0.867564	1.22041	3.81639	128.765	1.97349	0.0761996	24.6712	0.113863	18.994	0.783566	11.6125	45.4103	5.70803	72.6758	13.1378	49.2894	110.481	13.0987	64.7225
TCGA-EM-A4FO	0.028922	0.0171608	5.41767	2.24519	0.00766384	24.9815	3.69628	3.04101	21.8414	32.3205	15.3731	0.340252	127.246	42.5447	6.89041	0.0185303	53.1835	9.13865	64.2917	5.72101	23.5489	64.9559	34.1656	11.5576	2.16177	17.8696	11.6944	21.6894	0.127878	2.98996	0.667496	0.925869	1.95975	36.4705	1.95839	0.0524856	15.4918	0.0877782	9.51097	1.72745	3.998	15.4469	6.80924	68.1125	13.8274	26.4164	38.1483	10.4648	31.064
TCGA-DJ-A1QE	0.241292	0.0443228	75.2505	15.7905	0.0175415	21.3715	11.7757	6.90619	113.624	105.568	32.7138	1.55092	219.686	85.2137	4.52821	0.055452	138.168	15.7863	107.853	10.6769	224.665	183.615	102.321	19.0887	13.6584	22.5395	43.5652	106.811	0.439043	5.768	0.976003	1.96105	6.08781	534.594	4.91765	0.144892	38.8607	0.36769	35.6157	1.77646	37.1702	113.306	6.88964	146.029	26.7749	62.9136	169.43	11.1456	154.928
TCGA-BJ-A45D	0.0601937	0.0195472	26.5237	5.11878	0.0064679	27.0451	10.4477	4.07007	30.1299	88.4764	20.2802	1.0403	240.028	84.6112	6.79783	0.0454385	64.6302	15.667	115.703	9.75251	38.3199	75.4256	84.8225	23.4958	6.42723	22.9303	12.5997	15.9183	0.101753	2.49636	0.680877	0.856362	4.27309	26.3099	4.34071	0.0358102	31.4404	0.0370234	9.07755	3.22556	8.25279	25.0195	6.7429	78.2497	25.6462	24.9495	100.939	14.6826	78.2008
TCGA-FE-A234	0.0960135	0.0189549	33.7396	5.91261	0.0108979	22.7347	7.84239	4.88295	58.5085	92.4331	29.0116	1.12216	188.983	85.5214	4.74789	0.0522053	125.25	14.459	99.0021	6.3584	175.423	115.23	83.5529	22.7641	8.8256	21.5924	38.4919	70.071	0.308999	6.26547	0.880233	1.32096	5.84375	141.903	5.62422	0.0573451	23.8543	0.265284	21.6453	1.80277	16.4938	50.5944	9.20165	103.764	25.02	54.0012	112.54	11.9979	98.1552
TCGA-BJ-A2P4	0.0466396	0.0149327	14.8591	3.01211	0.00688981	36.2806	5.12015	3.097	16.7779	58.8374	18.0224	0.749668	252.542	95.2619	8.38839	0.0356672	59.9632	14.8637	107.2	6.53401	48.1645	73.3368	60.7256	21.2821	4.10039	21.5198	11.643	14.4756	0.0907342	2.25385	0.685458	1.004	3.85607	22.3284	3.42153	0.0285129	21.0134	0.0356035	7.72544	1.75354	4.91591	19.4087	6.95451	61.2957	15.283	35.1973	73.8108	18.9069	56.4773
TCGA-E3-A3DY	0.0895666	0.0189659	33.6162	5.06368	0.00999505	23.6542	8.30111	4.15563	45.1938	88.2413	20.005	0.948026	176.705	86.7205	4.36158	0.0570086	100.778	13.7929	82.0308	5.54281	217.195	117.325	55.3955	16.7428	7.81237	20.5729	20.1444	39.0713	0.220561	3.89181	0.84232	2.03266	4.637	129.719	5.11181	0.0459891	22.9827	0.150776	16.9711	1.21594	15.9117	48.3312	8.6897	72.3666	16.2546	48.5383	90.4647	13.0494	83.3352
TCGA-DJ-A4V2	0.130004	0.0311903	41.577	8.26252	0.0133837	19.8603	6.58032	5.37297	76.2808	95.2324	26.7668	1.2077	203.999	88.4433	4.17098	0.0489019	124.457	15.4818	106.757	8.13858	137.379	122.868	88.4406	21.1237	9.70402	21.4203	33.4443	77.8898	0.310101	4.44179	0.908027	1.52576	5.58617	245.538	4.39121	0.113895	28.8962	0.2108	21.8382	1.66032	21.7798	64.3619	7.73686	111.024	21.7813	51.1529	132.708	10.5301	114.817
TCGA-MK-A4N6	0.150481	0.0463063	45.7282	14.5169	0.0171658	25.4286	13.0636	5.97829	90.9823	109.061	33.3269	1.13411	182.759	74.2958	5.88489	0.0576713	135.8	14.5289	94.3401	8.25542	184.345	156.936	97.6791	20.8198	12.8264	22.5188	54.8478	116.558	0.537367	7.16874	0.93466	1.90734	5.43341	322.191	4.44489	0.174742	36.6201	0.418804	36.2632	2.25252	27.0322	98.2688	10.2216	158.255	32.9012	65.05	151.412	12.4757	133.615
TCGA-EL-A3TA	0.0439835	0.0150472	10.3379	3.02515	0.0073863	26.3204	5.66004	2.92713	24.0468	46.4467	16.4263	0.621849	166.967	75.326	6.06443	0.0291089	56.7248	12.4486	80.5154	6.33302	79.2445	78.0369	44.8078	15.6466	3.60066	20.7309	14.6467	18.3674	0.12313	2.99068	0.71566	1.14258	2.73397	42.9335	2.68533	0.0371904	19.7298	0.0775453	9.06879	1.75156	6.17911	28.3282	7.79382	60.9523	15.9605	32.5084	75.2268	14.1675	45.1905
TCGA-EL-A4K7	0.0741867	0.0285142	36.8004	7.70428	0.00742489	29.5626	14.0858	4.97701	71.6451	122.646	29.8925	0.926687	311.157	129.166	5.62905	0.0589351	131.467	20.4346	148.408	11.7248	349.837	117.807	138.125	33.1402	9.39942	25.7806	33.5087	31.2006	0.131313	3.14318	0.832278	1.77978	4.37364	123.536	4.31961	0.0599212	48.0826	0.114382	22.9084	1.95965	10.1444	55.0729	8.08634	100.481	34.8131	44.8657	142.569	13.1876	100.351
TCGA-4C-A93U	0.0878771	0.0324878	14.7855	8.57689	0.0147106	30.1122	12.4465	7.53614	69.6584	73.4793	22.9843	1.24229	184.368	71.6569	9.38303	0.0350568	101.215	13.8369	110.257	10.2212	122.081	168.366	69.2989	16.019	7.00935	20.9555	33.8499	61.1305	0.225897	6.55985	0.848688	1.07725	3.62599	128.408	5.80645	0.101921	31.6042	0.151403	29.3377	2.16711	11.1626	66.9792	7.30231	110.135	23.0519	56.6079	106.295	15.3497	75.0951
TCGA-E8-A436	0.0772715	0.0206154	22.2573	5.42179	0.0117286	22.0201	5.81697	4.51915	44.3145	68.7942	23.071	0.88945	170.571	78.91	5.87754	0.0428191	88.7953	14.8345	94.2618	7.32359	94.7019	112.418	61.0961	18.6454	6.84586	22.2479	28.7368	46.8617	0.269071	4.89845	0.843552	1.28853	4.62595	120.6	5.05003	0.0707288	22.2063	0.201033	16.0739	2.02648	10.9859	40.5355	8.16019	97.2104	24.4337	43.212	92.4608	13.9843	72.7958
TCGA-DJ-A3VJ	0.0632805	0.0149365	14.1275	4.47255	0.00825217	23.5124	9.68987	4.03173	51.0972	59.2816	17.438	0.819517	179.246	66.4862	5.52298	0.0258586	103.991	12.1604	102.797	6.0585	101.504	88.5598	61.5849	14.768	6.85743	18.6835	31.3371	31.2638	0.144576	3.78935	0.736168	1.33392	3.1986	52.0567	2.51566	0.0484839	27.4604	0.0709676	18.4042	1.25194	10.5645	45.8894	7.99139	90.8678	12.6319	34.5416	98.8582	12.8663	69.312
TCGA-EL-A3ZL	0.0688942	0.0395681	18.8059	4.5805	0.0135212	35.0694	6.02102	3.07766	33.2294	72.3633	28.8716	0.76753	229.491	116.966	9.25109	0.0303453	97.5179	15.73	102.24	9.56786	73.5662	104.695	77.4325	23.1413	6.21431	22.6876	26.2637	31.4913	0.183065	4.18298	0.916199	0.995111	3.28978	112.269	2.85774	0.0987724	20.817	0.188886	17.0527	0.892411	8.53594	41.8049	9.4262	78.4505	22.5915	71.2698	67.904	16.629	55.6373
TCGA-EM-A1CS	0.0681187	0.0155595	34.3113	4.31412	0.0120748	25.7052	4.51972	3.68891	33.16	77.4653	20.567	1.2797	214.818	113.814	5.00968	0.0631644	94.1364	15.5739	85.1544	5.33109	125.262	84.9486	32.6712	16.2943	4.67222	20.5878	16.8652	39.8055	0.207372	3.08992	0.910151	1.82738	4.59194	86.4898	4.41081	0.0395981	16.494	0.114405	13.0945	1.26869	12.5345	44.0355	7.43816	60.5011	12.7591	62.7847	57.5033	19.509	58.9747
TCGA-ET-A25N	0.126438	0.0382926	29.2765	9.05002	0.01612	20.251	13.5306	4.33417	91.8006	85.559	26.0856	1.45932	167.272	75.0814	4.48105	0.0437822	106.778	12.5474	93.2354	7.62287	141.144	125.838	66.4771	16.9357	8.7832	18.7472	40.9893	86.0834	0.2691	5.13415	0.899432	1.18165	4.16451	193.142	3.56847	0.119239	32.1315	0.227949	22.933	1.23727	24.3555	68.6164	7.36547	100.753	19.741	67.0749	186.643	10.6172	100.106
TCGA-DJ-A1QO	0.218443	0.042306	64.1501	16.0912	0.013256	16.6858	8.31209	5.92365	84.9484	107.602	27.4261	1.49906	201.832	69.1922	3.35791	0.0601553	103.404	14.5295	96.5606	11.9753	172.977	149.509	100.3	18.0631	9.801	22.2105	27.4604	72.4374	0.312966	4.19061	0.883097	1.60721	5.64723	338.764	5.36176	0.128775	38.4679	0.277536	19.4686	2.00994	34.3123	91.5657	6.83084	123.256	28.7094	42.7436	166.79	8.15563	159.019
TCGA-EL-A3ZP	0.0326084	0.00878455	7.41426	2.47235	0.00605041	17.9292	4.13154	3.1881	35.3065	40.8305	16.187	0.442226	154.513	66.699	4.09776	0.0165121	50.7006	12.5242	84.7296	4.4149	52.0963	57.3179	42.0803	13.8302	2.33621	21.4804	14.5779	16.0777	0.132214	2.5839	0.742567	0.665658	2.55283	26.2415	2.3358	0.0260398	15.1028	0.0729634	11.7643	2.11687	4.48405	21.1236	5.9119	68.572	14.4537	29.2226	57.6849	10.6536	31.4409
TCGA-DJ-A1QH	0.0956967	0.0158357	43.7358	6.06373	0.00840979	19.7404	10.8442	5.52387	55.5662	101.411	24.1056	1.21372	198.796	82.6696	3.92881	0.0542549	100.159	14.5588	105.932	5.79309	166.631	133.602	67.0553	18.9439	8.22402	21.355	28.0079	62.6642	0.22677	3.75999	0.855717	2.34382	5.62108	189.256	5.60084	0.0389	28.5679	0.14983	20.0658	1.61342	16.6083	65.0982	6.06315	78.9203	18.9612	55.2227	149.82	13.4964	122.702
TCGA-ET-A3DQ	0.0939097	0.0155563	19.9523	5.07807	0.0120976	31.0823	5.5345	4.11754	31.3839	48.3843	12.6751	1.20334	120.011	42.259	6.89736	0.0368789	38.7509	8.34347	61.3831	6.84516	47.7959	103.784	29.1071	12.2031	4.35875	15.968	9.49469	27.9073	0.227775	3.92093	0.66417	1.341	2.66084	87.5606	6.89533	0.0616712	16.8613	0.0932978	11.3689	1.51757	14.3926	32.3091	6.56216	58.0858	8.96569	33.5995	59.6876	17.181	50.8439
TCGA-EL-A3MZ	0.155733	0.0686761	31.375	13.4549	0.0184937	34.6106	17.8083	6.14016	82.7427	93.482	30.261	1.49521	200.72	75.9506	7.98428	0.0569056	151.158	14.0123	94.1081	16.0506	217.771	214.079	136.2	23.0203	13.6031	21.9494	53.3574	89.0024	0.385107	9.32068	0.883922	1.31283	4.90966	320.42	11.0361	0.214716	38.6512	0.381962	34.8998	1.40791	18.5792	77.0119	11.0686	149.558	31.8326	67.2423	147.231	14.1949	111.525
TCGA-DJ-A1QF	0.151958	0.0459095	41.2302	8.32715	0.021112	23.3598	7.88168	4.98261	52.2817	86.6289	28.7025	1.60919	194.349	88.2321	5.30769	0.0611735	91.5801	13.3031	83.2736	9.46854	158.771	185.876	51.9332	19.4856	9.26862	19.9453	28.9708	72.9501	0.314306	5.79244	0.946093	1.86992	4.91473	331.614	6.57445	0.122032	30.3061	0.261064	19.0035	0.82944	25.0981	68.5451	8.25838	77.8563	19.3376	74.8408	114.229	14.2108	95.8626
TCGA-EM-A3FQ	0.0621888	0.028938	18.599	5.596	0.0112694	36.793	9.44384	3.72045	40.1726	83.8289	25.7051	0.920226	221.168	99.8939	7.51909	0.0374458	82.7213	15.5479	97.6561	12.8381	186.329	103.274	125.472	27.795	8.71654	23.0796	23.5608	26.5048	0.15091	3.52919	0.790089	0.784913	3.56872	80.4778	5.79355	0.072895	29.7772	0.121284	15.4217	1.45534	8.08853	40.0057	13.5571	91.1082	29.3755	43.3297	62.9053	18.3928	56.966
TCGA-EL-A3H7	0.043825	0.0130715	9.10748	2.73715	0.00837964	21.5834	4.01055	2.36676	15.997	37.6147	15.7846	0.713568	119.934	59.2009	6.09564	0.0225836	56.2173	10.3689	67.0698	2.80635	90.8677	85.4796	21.491	13.8862	2.85342	17.3618	11.6213	33.5238	0.151817	3.30492	0.735033	2.02083	3.14669	48.5841	3.71289	0.029293	12.5228	0.0774583	8.3606	1.26415	7.7339	32.9841	7.77775	50.89	12.6169	47.4125	72.0745	12.623	43.3542
TCGA-BJ-A3EZ	0.115819	0.0361816	33.8806	8.72129	0.0109748	16.6316	7.45579	5.56496	61.202	93.1947	33.1252	1.13971	210.433	76.9645	3.43652	0.0575984	128.984	13.8065	96.3424	9.56549	198.743	145.239	96.4381	20.6573	8.73592	20.5271	37.5196	79.7298	0.323736	6.05875	0.952352	1.74818	4.90347	325.473	6.30977	0.10341	29.2506	0.261824	22.004	0.85373	17.0329	65.2699	10.0873	100.753	24.9455	60.5518	148.132	7.07691	121.306
TCGA-DJ-A3UM	0.10598	0.0284879	33.0741	6.91188	0.0134242	23.7497	10.2648	4.77819	56.7395	84.3689	24.6846	1.1869	197.027	85.647	6.14929	0.0489651	95.2931	14.1568	96.8316	8.10554	122.583	121.545	68.3044	18.9555	9.56435	21.4041	29.3054	49.7618	0.218933	4.47958	0.853095	1.45467	4.73254	150.266	4.41862	0.0822979	30.908	0.16909	19.592	1.6506	17.2698	54.0255	6.45321	89.0473	20.6231	51.3735	119.188	15.1176	92.6455
TCGA-EM-A22N	0.326846	0.0463812	52.9042	9.5317	0.0149906	34.0307	5.52391	4.84222	15.1079	101.136	31.2344	1.1574	169.481	61.6206	11.1358	0.104891	66.5022	10.8423	58.4815	5.92044	25.7696	168.179	54.2119	23.789	5.92672	18.9097	10.5592	49.4233	0.21521	6.23216	0.76866	3.79944	3.47449	230.446	16.0436	0.121165	21.1734	0.150979	7.18765	0.730707	43.6755	29.3448	14.2116	55.0994	27.7317	71.1886	95.9833	12.4282	89.2611
TCGA-ET-A39O	0.119005	0.0382895	40.3068	11.1724	0.0126379	20.9645	11.3114	6.41883	78.6305	103.709	30.541	1.04332	175.527	60.8235	4.7457	0.0571686	135.989	13.4084	97.5657	10.558	222.357	155.328	112.774	20.3148	10.1351	21.9808	46.6097	84.2716	0.363537	6.80773	0.845944	1.54398	5.04436	257.362	6.2474	0.125254	34.5233	0.275116	26.1169	1.95036	18.2032	77.5535	9.89481	127.158	31.027	50.6803	169.459	9.52724	130.859
TCGA-DJ-A3UY	0.0833204	0.0168775	19.4573	4.66526	0.00908047	18.652	4.58487	4.35007	30.04	57.2254	19.8369	0.989795	156.539	64.6371	4.98318	0.0344213	66.3624	12.0903	84.6448	5.77641	88.3751	123.251	38.5714	15.3405	4.49824	19.5248	18.705	43.1901	0.213638	3.59662	0.808472	2.0624	4.59361	135.188	4.05291	0.0443557	23.2931	0.131652	12.3313	1.43747	13.5956	46.6709	5.60175	64.8474	16.3285	48.3108	99.3752	12.1062	77.3734
TCGA-BJ-A290	0.0834031	0.0134655	21.5862	3.23778	0.00816305	36.2839	10.7917	3.19626	28.1485	67.1823	19.7732	0.771753	261.617	135.778	5.93919	0.0347358	95.019	16.8799	111.782	5.38738	186.227	122.884	50.8713	19.4787	7.30661	21.7118	17.4486	23.251	0.173733	3.64428	0.906717	1.56129	4.20601	82.1192	6.50885	0.0295855	25.2132	0.105212	14.5187	0.669897	10.2665	51.7985	6.39149	53.329	12.234	56.3973	86.1214	17.8688	53.0983
TCGA-EL-A3ZK	0.0764379	0.0328851	18.7527	8.10783	0.0124586	15.9048	5.17246	6.10408	53.6421	78.081	32.4922	0.928739	180.787	76.9988	5.19055	0.0419961	100.582	14.6068	98.0014	9.09755	66.5947	122.997	84.85	20.6528	7.45312	21.7891	34.6336	75.0206	0.326162	5.71084	0.95966	1.00327	3.97493	204.875	5.09866	0.108129	28.8532	0.219019	18.9818	1.55768	12.7424	35.1352	8.75329	86.5233	37.2986	57.0832	102.98	7.84673	84.8874
TCGA-EL-A4JZ	0.04012	0.0118704	10.7381	2.60137	0.0085188	27.8397	4.9855	3.48534	29.8001	55.3543	16.1989	0.560299	165.202	67.9271	6.40158	0.0215555	59.5091	12.4133	91.494	5.80158	42.6036	68.3629	38.9414	14.0613	3.52631	20.7665	15.1844	22.6173	0.160643	2.86697	0.736903	0.844276	3.14611	33.2506	2.44566	0.0370821	15.6927	0.0890757	12.1412	2.05238	6.15521	30.6588	5.86721	73.8347	13.7669	36.6021	62.6385	17.6219	46.3058
TCGA-ET-A3BN	0.226981	0.0361266	73.6062	13.2936	0.0160391	19.702	11.6122	5.57724	93.8872	102.368	29.8506	2.1816	200.725	86.6499	4.48834	0.0596995	147.802	13.6993	99.8269	8.4646	192.77	157.128	81.1464	20.169	14.7591	19.5866	39.6066	103.574	0.294634	5.03859	0.990155	2.0064	5.65355	389.764	4.06999	0.108571	37.8781	0.234151	25.4499	1.05041	43.6331	96.9201	7.56755	103.019	21.3963	67.8377	181.619	12.3765	122.622
TCGA-DJ-A4UT	0.0519723	0.016274	10.7795	2.85194	0.00969886	24.3177	4.19704	3.90359	28.655	44.6244	17.5323	0.513616	142.384	53.7137	6.20841	0.0202161	49.201	10.5319	80.1637	6.09897	42.6318	77.9022	45.1384	13.5587	3.66185	18.826	15.4367	28.5516	0.15424	3.15875	0.715301	0.885178	2.90146	56.5902	2.16604	0.0662612	16.9318	0.111281	12.6348	1.95069	8.39268	29.4636	5.63201	78.8319	14.6406	29.7655	56.2171	12.9968	45.7151
TCGA-E8-A432	0.055778	0.015975	12.7129	3.54323	0.0156562	47.4122	7.7957	5.21823	30.3057	78.122	18.1979	1.03269	231.223	98.127	10.6898	0.045127	105.15	13.6642	116.226	7.39586	72.1053	103.358	50.302	20.8999	5.78427	19.2851	18.7141	21.6148	0.122556	2.96922	0.726439	2.31401	3.47453	44.3502	4.27149	0.0652355	20.0484	0.0406979	14.9269	1.20186	9.10948	37.8737	8.70779	73.8634	9.21116	51.8219	48.5301	31.1961	54.4026
TCGA-FK-A3SE	0.0924528	0.0208697	19.8271	6.63621	0.0105008	17.8678	11.1303	3.78818	67.1476	85.4506	20.6226	1.64825	183.991	82.5862	4.51256	0.0425484	123.967	14.0428	106.226	5.74607	145.942	131.828	56.4653	16.6002	7.44581	19.8244	33.8467	56.2483	0.189126	4.01128	0.844017	2.28042	4.93802	117.525	5.97347	0.045032	32.5927	0.0990006	17.4581	1.19377	18.5601	75.4107	7.76628	90.1618	15.03	48.5943	193.142	11.3851	98.7981
TCGA-EM-A3FL	0.147007	0.029098	34.6129	8.27915	0.00751314	21.5504	8.31097	4.96984	28.0573	82.3303	25.7238	2.19908	185.694	59.7705	7.65149	0.0934271	75.8153	11.0251	75.2079	7.78079	93.9237	201.009	51.8213	20.579	8.19633	17.5194	17.1342	45.0637	0.180248	5.49215	0.726505	3.65453	5.22216	206.788	11.9502	0.0469737	38.268	0.0725633	10.8003	0.619574	22.3224	36.9138	9.76538	63.7078	20.7963	49.2397	173.57	10.043	100.008
TCGA-IM-A3ED	0.0840504	0.0239753	20.0033	5.5838	0.0138479	17.5393	7.97444	5.03749	65.6611	65.8761	21.3836	1.06982	140.438	65.0584	3.72656	0.039426	82.3428	11.834	79.3623	6.72599	87.5915	123.313	46.6229	13.8027	6.82697	18.3764	23.8679	58.1328	0.245072	3.95262	0.811093	1.43664	4.00279	201.321	2.96568	0.0801574	27.4183	0.167999	18.8216	1.28761	14.7715	50.1528	6.26671	109.09	14.7998	43.948	98.7812	9.62881	79.417
TCGA-E8-A413	0.0679203	0.0127317	16.0267	3.36589	0.00886391	24.1669	4.60644	4.17531	27.9648	44.6519	18.9336	0.698033	158.517	72.9855	6.14357	0.020438	65.2795	12.5468	92.9889	5.76664	67.7899	89.1418	38.1316	15.6577	4.22225	19.9104	19.2198	30.1146	0.179022	3.34753	0.773724	1.53757	3.55896	100.637	2.41331	0.0400474	19.4746	0.110282	12.4491	1.39921	10.02	42.8577	6.01342	66.4472	13.5434	43.3432	85.2644	14.1992	56.2957
TCGA-DJ-A2PO	0.0595225	0.0134221	20.8401	3.2042	0.00853598	18.8813	4.16601	3.32122	26.1187	58.6588	16.8402	0.767109	149.265	66.3198	3.81418	0.0410151	63.3023	11.7871	75.639	4.74783	105.197	84.536	38.126	12.8838	3.62339	19.2121	14.5603	32.5925	0.174235	2.9488	0.791641	1.42405	3.91501	75.3298	3.53939	0.0378577	16.2591	0.10576	11.1563	1.73913	10.1919	34.2587	6.80159	59.0864	13.1495	36.6883	68.8259	10.9128	59.6697
TCGA-BJ-A45F	0.173821	0.10993	33.7709	10.0159	0.0236257	36.936	6.55361	5.44479	31.0339	87.3977	31.1495	1.83795	194.976	67.1769	11.9031	0.0844795	81.3929	11.933	73.7404	20.4828	71.6186	170.549	88.9942	22.9231	9.30568	19.5412	30.8499	71.2983	0.353237	8.53543	0.899337	1.36661	4.34177	325.467	16.9782	0.240315	35.4448	0.249711	15.0689	0.750827	18.4332	41.4926	14.3134	82.0217	32.0957	67.3768	130.225	15.7253	88.3034
TCGA-KS-A4I7	0.0432991	0.016579	17.9644	3.62772	0.00961101	31.3103	9.50418	3.60389	43.4351	80.704	19.0615	1.08547	209.505	99.3245	6.5998	0.0551135	106.077	15.4853	104.295	7.58651	115.264	81.2134	68.2111	19.9906	6.23846	21.7297	21.2634	29.8817	0.145059	3.59592	0.769984	1.39344	3.64078	49.251	5.12249	0.0466523	21.6673	0.0798897	14.9103	2.05707	6.96806	31.4865	8.29323	76.3245	15.8537	37.5651	68.4941	19.8714	56.6004
TCGA-EL-A3GP	0.14186	0.027803	11.9998	6.6618	0.015516	36.8851	11.0229	6.41417	24.3739	78.7715	21.3517	0.671076	131.045	49.7983	10.4822	0.0362196	83.0859	9.9072	75.6974	8.36986	53.8202	157.088	44.0733	13.8701	8.6049	17.8231	24.0187	66.7782	0.388017	7.96268	0.72504	1.80154	3.95423	200.997	5.9798	0.0670263	35.7978	0.218151	13.6183	1.05155	19.074	78.5668	7.71106	143.545	18.4139	52.4469	98.7411	14.2147	75.4198
TCGA-DJ-A2PW	0.102718	0.0414798	34.9994	10.7974	0.0159781	25.3955	11.6255	5.52455	97.7462	87.6615	25.3179	1.19406	191.476	80.5722	6.00064	0.0578731	106.654	15.3123	101.781	12.406	160.214	127.514	79.6544	20.3615	10.3897	22.2842	49.1144	63.7993	0.326759	6.60346	0.871188	1.32511	4.00769	138.634	4.79979	0.140984	35.4716	0.188535	26.2842	1.80129	17.3739	58.3358	7.41848	109.081	21.7377	48.1842	155.657	13.0887	91.7258
TCGA-ET-A39S	0.0690819	0.0134026	23.076	4.2717	0.00762555	23.5918	7.59528	3.26604	32.4269	70.2762	17.5478	1.21772	185.615	82.531	5.4674	0.0453133	76.0963	13.2535	99.5927	5.81725	105.854	91.2136	44.2965	16.0999	5.43244	19.8477	16.569	26.4025	0.136242	2.81661	0.761063	1.66265	4.0667	58.1459	3.72763	0.0328374	20.7402	0.0729616	12.0048	1.42363	12.3679	41.9719	7.02864	58.8133	13.2167	40.3112	105.862	14.5503	73.0004
TCGA-DJ-A3VD	0.0507069	0.0108352	9.19432	3.12545	0.00665832	17.0789	3.06083	3.53961	29.99	36.3057	15.6577	0.362496	120.236	46.3048	4.24572	0.0142192	50.2517	10.2801	77.2606	3.84673	53.5956	74.8535	29.9967	10.8521	2.69536	18.3792	12.1285	27.8404	0.1529	2.21891	0.727396	1.38153	2.79804	69.5119	1.16908	0.0400746	15.6988	0.120236	12.4915	2.11596	8.18901	30.9824	4.71652	75.5127	12.8631	30.4564	52.015	9.76634	46.6259
TCGA-DJ-A1QL	0.0625629	0.008684	22.2964	2.42159	0.00472743	18.1553	2.79146	2.66577	12.2725	52.4937	15.9378	0.735978	245.424	96.584	3.8571	0.037525	52.5155	13.5214	85.5263	4.37003	41.1466	63.1819	24.3138	12.907	5.03357	19.5336	4.59629	11.4057	0.0924542	1.38098	0.78594	1.70965	4.76531	36.0307	2.27119	0.0169862	19.2422	0.0217307	6.0063	0.836726	8.1803	24.1784	5.26615	44.5809	9.43803	32.6778	76.6646	15.1852	51.6331
TCGA-L6-A4ET	0.073253	0.0146526	36.8602	3.68219	0.00768577	28.7917	10.5419	2.69405	37.3162	88.0571	23.7592	0.877734	279.199	159.368	5.83791	0.0472463	102.575	20.2104	123.834	5.45248	228.197	87.1731	59.1636	25.6173	8.87362	24.994	17.2961	22.5569	0.101433	2.25959	0.87758	1.35234	4.07682	52.2498	3.5144	0.0330984	21.8322	0.087932	13.8777	1.83648	11.6441	38.3558	7.82293	51.2368	21.3848	52.7503	71.8145	18.2141	72.4113
TCGA-EL-A3GV	0.0959232	0.0186495	25.6401	4.84934	0.0116238	17.2871	6.67699	3.92952	39.2192	78.8834	20.0013	0.983151	156.597	68.7535	3.64656	0.0453813	79.7874	12.0282	82.7338	5.36345	145.614	94.0931	48.4742	14.464	5.33323	18.8873	19.5441	50.3202	0.231304	3.93796	0.804687	1.37275	3.92052	128.401	3.68395	0.0542948	18.2207	0.14606	14.185	1.43055	18.6352	53.6631	6.81656	70.6105	14.515	47.5999	102.105	10.4339	79.2702
TCGA-EL-A3MX	0.123503	0.0199449	32.6809	5.12005	0.0107931	25.7921	5.31278	3.75781	17.8611	61.8412	21.1857	2.04678	213.162	104.896	6.83293	0.0647547	65.8021	14.4058	85.2081	6.52163	80.494	146.529	29.5281	18.6978	8.65884	20.223	8.11626	27.312	0.15528	2.13165	0.819037	3.21419	5.46971	116.055	7.57857	0.0408628	21.6361	0.0669734	9.39783	1.07009	17.6239	47.6607	6.06371	50.2462	16.4796	52.0433	107.518	17.633	73.4445
TCGA-EM-A22I	0.170042	0.076954	44.8995	15.0041	0.0222014	26.0975	10.4058	6.45154	102.805	105.266	32.7836	1.61898	202.739	74.9304	5.89063	0.062122	134.132	14.0667	97.8597	17.4404	143.712	186.893	122.429	22.9258	12.5539	21.4418	57.586	103.769	0.483877	10.3684	0.954827	1.30522	4.96997	531.822	9.96502	0.283667	39.6287	0.429085	31.2838	1.40036	25.1744	84.7344	10.4711	152.192	32.3271	63.4338	170.483	12.3156	131.107
TCGA-E3-A3E2	0.0412325	0.01029	8.52775	1.98623	0.00642354	29.5394	5.27998	2.7259	19.872	46.5451	14.1302	0.359879	145.911	58.8683	5.59523	0.0266282	60.238	11.8278	83.1562	3.43031	130.569	74.3669	33.5714	13.0399	3.85089	19.9678	10.3095	17.2964	0.113477	2.24241	0.682703	1.81951	2.46476	37.2483	1.42543	0.0279718	15.8907	0.0700174	10.5987	2.00968	6.38803	20.3899	7.56057	52.7431	10.4731	29.4197	35.4637	13.4956	37.9885
TCGA-E8-A3X7	0.108877	0.0571647	28.8691	8.83379	0.0141214	30.8433	16.1104	6.01842	73.1108	98.91	31.5358	1.49755	217.113	84.3588	8.45111	0.0678949	113.702	15.8821	113.684	21.3119	171.157	148.71	140.159	25.8894	11.233	23.8162	47.3148	60.1024	0.272867	7.139	0.849886	1.56731	4.28422	265.818	9.07787	0.178121	45.7898	0.259205	23.9962	1.79442	14.8107	54.0105	10.0602	106.321	37.8878	53.2434	141.611	12.8275	120.923
TCGA-EM-A4FN	0.0984847	0.0592256	27.1647	9.39604	0.013635	32.6119	10.2959	4.78067	62.7156	106.423	31.0004	0.853988	222.76	84.4845	7.01032	0.0459325	110.915	16.2711	114.151	16.6636	199.379	115.461	145.015	28.8792	8.76336	24.2906	39.7095	51.4174	0.269523	6.53339	0.846144	1.12666	3.64991	167.473	5.19589	0.171384	37.6159	0.260572	22.6042	1.81157	12.5914	48.5264	11.8595	112.607	39.5083	49.8516	101.706	12.6048	88.7714
TCGA-BJ-A0Z2	0.0577457	0.0110118	31.0533	2.56492	0.00670466	28.843	3.54628	3.31265	17.9498	73.8895	19.7625	1.16616	255.318	123.269	5.96866	0.0748418	99.76	16.8157	87.693	3.70465	95.3989	80.334	40.6567	17.0937	5.69807	19.9331	11.32	22.0938	0.13403	1.96696	0.859396	2.61506	5.95749	60.1798	6.39407	0.0206649	17.247	0.045219	9.40708	0.941858	9.34297	29.5699	8.69159	55.236	10.9974	50.2158	78.8346	18.1613	70.3091
TCGA-E8-A2JQ	0.0260979	0.00549294	3.81668	0.707523	0.00463351	16.5324	1.46845	2.21926	7.24309	20.1996	10.6199	0.249044	99.0681	38.8525	3.88863	0.0165758	31.1005	8.76527	60.2112	1.77888	53.1692	62.9256	10.5342	7.7056	1.42167	16.4497	4.21381	12.383	0.0961457	1.58444	0.643946	2.08853	2.26278	20.9603	0.975049	0.015472	8.2335	0.0382486	5.3139	1.77514	4.46671	12.2659	6.09505	34.4948	7.10218	23.7245	23.6474	8.84034	24.3071
TCGA-BJ-A2NA	0.164143	0.0444404	53.6873	9.67299	0.0160205	25.7154	10.3286	5.81109	60.5037	95.8165	24.3337	1.47771	185.761	71.085	5.99563	0.0689492	118.181	13.1025	93.4676	11.1584	163.83	148.403	91.7302	17.8647	12.7698	20.3107	37.8283	62.5526	0.300981	5.45022	0.862746	1.80071	5.22274	248.158	5.41238	0.133039	35.6737	0.200429	22.9778	1.29444	25.6267	82.3046	9.28279	103.571	20.0381	49.99	150.261	12.1384	124.829
TCGA-EM-A2OY	0.565017	0.308304	98.0019	40.0467	0.0357567	40.8749	5.12091	7.35439	40.6345	232.752	37.8845	3.08444	228.506	80.9498	13.5923	0.187026	150.461	12.6191	72.3577	18.5046	126.314	495.269	129.158	30.5343	15.9047	18.8747	28.2639	135.795	0.515884	14.0256	0.883441	5.41043	4.43028	1184.48	31.1919	0.338786	31.8241	0.32646	13.2616	0.460827	68.9887	51.5044	25.9734	101.225	37.9198	109.83	169.721	12.3391	157.139
TCGA-EM-A22K	0.0787552	0.0143683	34.7572	4.54628	0.00991984	28.3423	5.03618	3.25156	26.5286	76.113	18.3341	1.42828	226.397	93.0837	6.24009	0.0614415	84.9589	13.4631	77.9128	5.05483	93.7332	93.5127	43.5095	16.0696	6.01986	18.774	13.32	29.6298	0.143074	2.72792	0.806239	1.46738	4.43709	60.6269	7.42684	0.0294384	21.9111	0.0542852	9.16151	1.02753	11.3313	37.2405	7.92502	63.3453	11.1597	50.8598	88.1987	20.0207	64.0034
TCGA-BJ-A291	0.172445	0.0548729	47.9254	14.8363	0.0133201	45.8463	9.82815	5.77385	47.9494	74.6981	26.0269	1.99726	233.45	68.9234	12.2036	0.0648546	76.8817	12.3982	87.7034	15.6997	91.9793	166.213	64.639	22.3642	9.09988	19.5545	19.0843	37.2297	0.179766	6.64362	0.766317	3.0795	3.40681	137.032	8.01561	0.135765	54.2635	0.129348	16.0114	1.13375	21.592	53.18	12.1402	81.8846	20.6402	47.1048	173.495	18.3395	92.4856
TCGA-CE-A3ME	0.0923814	0.0150642	35.6583	4.14447	0.00724632	19.9955	7.62538	5.10265	35.9456	83.1899	20.7024	0.857751	198.157	91.3425	4.64061	0.0563984	103.044	15.5364	112.66	5.08325	154.159	118.519	62.313	18.025	7.389	20.888	24.2337	41.6963	0.170086	3.37368	0.8514	2.25326	5.60499	84.3184	4.65012	0.0378002	21.672	0.104909	13.8228	1.24137	14.6006	47.7518	7.24476	57.9355	14.661	45.0898	149.446	12.6427	88.6141
TCGA-EL-A4KG	0.102592	0.0373064	31.5351	10.3488	0.0138728	27.8537	12.022	6.20119	77.7954	96.649	29.097	0.930139	213.25	83.2782	7.35617	0.0496738	121.638	17.919	131.497	11.1708	221.857	109.013	116.714	23.0064	10.8428	25.2563	62.3177	62.171	0.36081	6.62125	0.866815	1.13748	4.59319	123.928	4.31746	0.116383	37.1544	0.245017	24.9303	2.82437	14.4163	63.8901	8.09027	120.648	33.5944	44.434	120.554	13.3262	111.576
TCGA-FK-A3SH	0.106739	0.0233763	38.8543	7.22515	0.00903901	35.1059	10.4649	4.15047	64.4757	103.45	26.6893	0.819405	297.127	149.643	6.50072	0.0371997	111.333	20.2235	136.916	9.91704	139.018	94.2956	112.688	31.4285	8.30895	26.1061	32.6801	25.895	0.185853	3.88508	0.863394	1.34615	3.64923	70.0585	3.17712	0.0577586	30.8576	0.156283	20.8764	1.98103	13.4753	41.031	6.46145	99.117	25.7478	49.5975	107.164	18.3516	78.3405
TCGA-EM-A3AJ	0.0445715	0.0094266	9.98653	2.67278	0.00604972	17.7129	4.12516	3.87588	14.3518	40.6109	14.8225	0.648925	123.46	44.691	4.45877	0.0322976	51.7622	9.03053	63.7886	4.37562	22.3077	83.6975	21.9125	10.9517	2.31082	17.1949	11.1997	20.2067	0.143981	3.88507	0.65305	1.36073	2.80505	21.4768	3.5512	0.0204945	13.1825	0.0355959	5.86388	1.42926	7.59433	12.1687	8.67344	50.3874	12.2663	26.9628	71.1335	8.43248	33.9924
TCGA-FE-A238	0.143493	0.0297838	45.9641	9.53767	0.0136252	27.0967	12.146	5.03522	65.3689	126.267	26.8117	1.23276	222.019	84.0988	6.57316	0.0687869	127.453	16.6753	115.13	7.93491	256.657	113.906	79.8194	19.4105	10.4538	23.0824	42.0599	56.8454	0.361814	5.7471	0.860323	1.70953	5.31471	103.883	5.43816	0.0984432	31.8629	0.163482	21.4117	1.84542	25.534	75.2759	11.1491	99.8943	21.6792	45.6715	131.024	15.3408	121.325
TCGA-H2-A26U	0.0430711	0.015795	9.79001	3.39773	0.0100067	18.2408	6.40654	3.91865	43.5134	40.8721	17.279	0.552551	144.439	59.1638	4.32422	0.0233214	47.8712	12.3164	88.6031	6.06317	53.334	84.3182	49.902	14.1445	3.85655	21.2536	18.8896	34.269	0.215965	3.35897	0.763709	0.741784	3.19041	75.0656	2.14804	0.0561841	20.8967	0.165931	15.0689	3.34269	7.2231	29.8372	4.66417	99.508	18.8583	30.3228	54.2924	11.2813	48.7253
TCGA-CE-A484	0.065521	0.0133664	25.1108	3.33477	0.00833218	41.9611	5.00242	2.64981	13.4804	73.4843	19.6494	0.792982	236.113	130.342	9.97483	0.0362159	86.1785	16.6871	101.941	5.27357	79.3724	75.4342	54.9365	22.2884	5.89917	21.7876	12.7315	16.5488	0.108809	2.14832	0.805128	1.25819	4.29425	37.639	3.94479	0.0254787	16.7979	0.0562293	9.32099	1.01544	6.85617	29.0171	8.90206	50.4036	13.5767	52.9834	64.4311	24.5415	48.2892
TCGA-EM-A3AQ	0.0826927	0.0181478	25.1564	4.54575	0.00891286	24.7367	10.2424	3.65239	36.9392	89.9717	20.5001	1.03638	210.275	92.3088	5.15095	0.0441914	87.6144	14.5029	107.975	9.57621	126.327	94.9679	73.2199	20.8586	6.81284	21.8446	16.634	23.8125	0.122959	2.70514	0.773866	0.878964	3.44769	59.9609	3.46198	0.0419346	22.2216	0.0853615	15.3284	1.67148	13.5529	38.1841	7.74012	60.6328	17.7969	38.7129	93.2272	15.547	67.5748
TCGA-IM-A3U3	0.104927	0.0295872	29.8362	6.63725	0.012575	25.56	9.38715	5.05626	45.4009	100.571	25.4525	1.17293	212.96	86.4188	5.63249	0.0729626	124.752	15.6882	104.194	8.61952	182.87	126.108	82.7784	21.3938	9.23855	22.7249	31.0427	58.3806	0.262394	5.03202	0.884386	1.76208	5.48452	163.937	8.67256	0.0729427	27.5698	0.177152	19.6481	1.896	15.8681	53.1992	9.38784	88.9742	23.5243	50.0972	98.8001	14.0183	98.9965
TCGA-IM-A420	0.0552601	0.0288373	15.2036	5.30948	0.00934333	19.0588	4.91596	4.68499	61.4603	60.2736	25.937	0.649764	174.547	69.4705	5.16696	0.037283	80.6535	14.1975	96.7984	7.64268	108.133	116.021	84.8921	19.5249	5.71965	22.4649	34.7454	57.1844	0.272578	6.08284	0.854414	1.40391	3.66777	170.572	4.18654	0.0941028	27.7334	0.237224	19.0431	1.87464	8.19937	38.4093	7.44871	97.1191	27.5479	41.5617	98.8341	8.59642	75.2203
TCGA-KS-A4I5	0.0469291	0.0271664	13.4771	5.30026	0.0113398	38.1772	7.69577	4.32869	60.7025	57.4458	29.291	0.772842	239.136	113.845	8.65997	0.0307304	69.9118	17.8028	130.474	7.68185	130.434	76.6337	71.0566	24.1242	6.29962	25.8677	36.1547	36.0797	0.170012	3.75478	0.921063	0.868046	2.61022	46.9281	2.67413	0.0840601	24.9404	0.117328	20.3091	2.15441	7.48667	34.1437	8.40462	79.6357	27.9305	52.3984	81.0241	18.6581	45.6303
TCGA-FE-A233	0.149924	0.0313911	61.109	9.31868	0.0116162	20.8794	7.72974	5.88738	74.7765	96.1413	28.9075	1.46304	216.676	90.4927	4.93686	0.0569257	119.609	15.168	113.764	6.81021	168.116	169.922	75.9288	19.2646	10.6713	20.8976	36.0988	73.7591	0.285234	4.63581	0.961701	2.04694	6.20723	216.081	5.70168	0.090051	32.3327	0.220715	23.5212	1.0358	26.1042	79.077	6.59715	90.8982	19.4371	61.8194	193.845	12.7606	127.278
TCGA-ET-A2MY	0.203113	0.0461061	63.407	12.4474	0.0136779	25.6876	12.3075	5.45087	55.1667	142.034	31.734	2.00175	222.973	88.685	6.31351	0.13057	174.235	15.7089	103.324	11.7403	279.698	199.407	119.187	26.4043	15.0212	22.6256	40.626	81.33	0.312624	7.31488	0.916523	2.09332	6.52905	342.322	15.2349	0.0938088	36.2331	0.272635	23.0363	1.42867	30.792	71.8772	13.6207	97.7137	32.2864	65.544	166.498	13.4572	144.989
TCGA-E8-A418	0.0776586	0.0289336	28.296	6.74989	0.0114728	26.9795	10.4772	5.49016	41.3337	118.787	30.794	1.05556	245.215	95.0331	7.14718	0.0929281	214.089	18.1169	133.48	7.73423	363.001	130.897	120.277	28.1783	14.868	22.9998	47.8807	70.3184	0.283165	6.99501	0.913058	1.97717	5.39744	125.988	12.2586	0.0792202	29.2098	0.151625	22.5647	1.68854	14.7385	50.9391	13.2372	86.9341	28.4577	53.1576	108.507	14.1529	120.244
TCGA-ET-A39M	0.0318527	0.0265027	9.14034	4.67607	0.00859509	27.4932	8.94319	3.62624	52.5122	61.3002	23.7034	0.58676	180.23	65.8767	7.40218	0.0329273	78.2905	13.2319	87.8267	13.9152	55.5927	71.013	89.9547	21.6081	3.67018	22.5232	26.1793	28.2021	0.148682	4.53167	0.700185	0.730415	2.33977	54.5772	3.50398	0.0714951	28.1307	0.122516	13.9661	2.45235	4.1164	19.3063	8.25158	110.36	30.1106	29.368	55.1181	10.7348	51.6015
TCGA-DJ-A2PQ	0.084536	0.0138537	32.2045	4.29168	0.00738085	27.283	8.8573	3.28565	32.3224	90.3664	21.0548	1.14214	205.254	99.8465	5.24256	0.0460839	125.849	13.8488	93.1493	5.22189	290.547	106.181	53.1612	18.5107	7.58628	20.1594	19.0672	31.7046	0.138134	2.95673	0.824991	1.77359	4.12467	82.5578	4.22656	0.0275444	23.0428	0.0848365	14.0512	0.815947	14.6223	54.345	10.0409	61.7908	14.2031	57.927	92.7018	16.1769	76.0994
TCGA-EL-A3D5	0.11861	0.0135709	30.5403	4.84579	0.00835993	25.309	6.19982	3.25745	27.709	87.6742	29.3921	1.35758	269.712	95.0913	6.83985	0.0634968	124.404	13.9543	90.0796	5.01543	207.953	113.347	33.4554	20.9496	10.2794	20.6816	21.9767	38.9567	0.244238	6.60546	0.911997	3.14765	4.00233	87.8088	7.47897	0.0256717	29.7314	0.0731738	9.61155	0.845184	24.0836	58.4722	11.4428	59.602	21.8386	55.7135	117.672	15.3254	89.7239
TCGA-MK-A4N7	0.102277	0.0200868	51.0451	6.30592	0.0119839	30.5541	10.6598	3.42048	60.8124	105.378	22.6141	1.16347	221.031	121.603	5.82665	0.0526016	121.267	16.0998	105.268	5.60868	264.074	127.836	60.8521	22.3896	9.23096	21.5399	31.2852	42.7483	0.212682	4.492	0.895288	1.57126	4.45368	121.062	5.4162	0.063385	23.8385	0.164509	22.8988	1.00195	17.9105	63.8872	8.37102	76.6228	14.0047	66.458	120.591	17.8241	82.6404
TCGA-E8-A438	0.0754948	0.0211964	19.3467	4.28287	0.0103191	36.6472	5.23918	3.33479	27.7676	57.1708	19.2754	0.782613	238.53	93.4307	7.76949	0.0260297	53.1795	14.4909	103.816	9.81805	57.8075	85.4974	75.1889	20.0995	5.48395	22.0889	14.0538	15.7891	0.109098	2.15693	0.79938	0.609735	3.62475	41.1651	3.72659	0.0620555	23.7755	0.0822102	12.3617	1.82541	9.68156	28.5124	8.02777	73.311	20.2077	34.5653	54.8707	22.1644	44.5771
TCGA-EL-A3MW	0.0647849	0.0151657	20.7998	3.78277	0.00826956	28.17	7.68817	3.21847	29.087	69.3373	20.9292	0.730081	190.618	102.655	5.5357	0.0425226	83.6587	15.6062	99.2109	5.30723	189.69	95.9766	53.16	19.3027	5.97474	21.5329	16.0994	30.6679	0.146556	2.89969	0.803911	1.5533	3.54955	72.5816	4.72877	0.0344118	19.3029	0.11232	11.3122	1.23772	11.4463	40.2198	8.41861	59.7656	15.7828	49.9827	78.8914	13.6432	62.5054
TCGA-DJ-A3UV	0.0681734	0.0124853	16.6553	3.50075	0.00913052	29.1809	4.96669	4.13248	25.5397	53.4152	15.632	0.946269	180.26	69.2508	7.00327	0.0306503	61.2285	12.2725	85.2481	4.97715	76.6985	89.85	36.5293	14.4233	4.95989	19.3862	12.2768	24.1781	0.155868	2.8181	0.737441	1.90015	3.91253	49.8672	4.24308	0.040736	18.6727	0.0682721	10.9324	1.44214	10.4223	35.0656	6.14718	66.8543	10.6152	40.3687	81.2384	18.8056	56.8186
TCGA-E8-A434	0.0644202	0.0120816	18.8681	2.83134	0.00737997	24.0407	3.80277	3.92478	18.608	59.0511	17.5055	0.900976	195.135	91.5265	5.88339	0.0445304	85.6017	15.168	103.946	4.72315	100.659	96.9523	36.9615	16.2257	5.29305	20.6175	14.5067	23.6442	0.140562	2.58836	0.810505	2.19262	4.4998	57.3735	5.21126	0.0301466	17.8284	0.0584845	9.68461	1.2384	8.92408	31.5565	6.66806	46.052	12.4183	42.836	85.1621	15.1096	63.9292
TCGA-DJ-A2Q4	0.113053	0.0279015	36.1387	7.31695	0.0125228	22.3786	8.69175	5.26988	80.1633	89.3037	24.208	1.46426	188.354	84.8841	4.0161	0.0439649	103.142	13.6901	92.6983	8.37425	136.527	143.716	75.9408	16.9376	10.7491	20.1755	31.0755	55.7558	0.232393	4.16935	0.857132	1.40211	5.20934	250.246	3.41103	0.0983928	32.9982	0.183078	22.7979	1.18554	18.0661	66.4371	6.58973	121.285	18.7175	46.6345	141.297	11.2314	104.504
TCGA-BJ-A0YZ	0.270354	0.05959	69.437	16.5302	0.0176913	25.3136	12.0567	6.23937	38.7772	102.479	28.5393	2.14239	228.44	69.5058	5.48929	0.0735634	74.9601	11.9049	86.0871	14.6002	43.7758	187.509	55.7346	18.5396	11.6835	20.2581	20.6285	45.2467	0.237193	5.98705	0.840336	2.67857	5.61715	134.405	6.43166	0.105926	41.5779	0.0968802	11.8921	1.05993	36.4512	51.09	10.0365	82.5885	25.206	51.8689	255.636	12.0779	123.342
TCGA-FY-A3NM	0.136121	0.023496	43.6609	5.52959	0.0114554	24.5887	5.75747	4.32987	28.4392	65.0673	21.9706	1.91782	225.183	91.6438	8.06938	0.120314	71.6811	14.2467	74.8804	4.25953	104.902	154.927	36.4693	19.7089	6.63895	18.3934	13.8391	43.0181	0.194506	7.54743	0.845063	3.19426	4.38504	122.9	14.9422	0.0528955	21.4301	0.0955443	9.37832	0.853515	23.5071	35.1144	11.3284	34.9984	15.4162	63.9263	172.648	11.5565	67.812
TCGA-KS-A4I3	0.118603	0.026515	54.0961	6.62598	0.00906371	23.7343	9.14224	5.31543	42.9363	92.604	21.7018	1.25414	209.252	84.1484	5.52001	0.06286	121.609	14.0602	97.3043	7.64707	146.509	152.177	74.6251	18.7249	10.6119	20.3797	26.1083	48.5292	0.218121	4.15105	0.851217	2.07116	4.8933	157.505	6.01064	0.0727244	29.3379	0.133631	16.1459	1.07734	17.4633	66.0178	7.59769	62.7536	16.5091	49.9052	208.489	11.8494	105.71
TCGA-BJ-A3PR	0.0381784	0.0109037	6.48646	2.24468	0.00402766	25.5428	5.873	2.77699	13.2764	37.8499	15.6432	0.337129	155.644	53.0802	7.28084	0.024322	51.2417	11.5986	87.9668	5.17511	86.9176	74.6552	48.0482	17.1061	2.09265	20.5574	9.42645	11.571	0.0748233	2.33353	0.572393	2.13721	2.10783	23.7922	2.22126	0.0210742	22.7772	0.0305797	6.7451	2.77638	4.6998	13.8569	8.83721	47.045	19.5721	19.6234	38.8435	9.62239	42.1377
TCGA-J8-A3O1	0.209087	0.00951576	53.5893	5.20565	0.00543242	17.558	9.61604	4.79922	44.6576	97.1347	21.4344	0.824422	217.3	106.137	2.90511	0.0371858	141.404	17.0906	122.199	3.59208	160.135	175.025	59.1966	18.5827	10.7955	20.6899	16.212	41.4879	0.210183	2.83276	0.985047	1.61618	6.38089	141.961	10.0854	0.0201433	19.3822	0.146585	15.9419	0.589735	38.4565	62.8257	6.18084	60.7867	13.2499	69.6019	170.175	10.6514	110.743
TCGA-DJ-A2PY	0.108785	0.0195468	25.3925	5.70999	0.0111973	24.4145	8.04981	4.81573	41.3901	84.4979	21.5629	1.04169	152.588	63.6249	5.27764	0.0346782	106.148	11.4861	87.876	6.3022	174.316	140.134	56.332	16.4776	6.66488	18.573	29.4746	61.0208	0.308094	5.31579	0.809473	2.04701	4.3909	227.815	3.24642	0.0599318	25.2061	0.189874	21.3942	0.87054	17.3659	67.952	8.67489	87.9914	14.1405	63.2112	108.011	11.9189	94.7817
TCGA-J8-A4HW	0.0363586	0.00740362	8.79189	1.36985	0.00786069	15.4222	2.15267	2.85005	19.9793	40.7403	10.3046	0.505075	131.903	57.0955	3.10101	0.0259835	44.3578	11.389	78.2619	3.34846	38.6997	54.5753	26.6548	9.50295	2.61925	18.3008	8.72086	15.9931	0.126579	1.61651	0.677222	1.10846	3.00404	31.066	1.57313	0.0320711	12.8966	0.0502146	6.97852	2.82587	6.46337	24.0769	5.22235	51.7602	8.39498	17.4268	47.416	10.0485	38.3969
TCGA-KS-A4IB	0.155105	0.0888834	46.4611	10.2046	0.0280761	36.9164	12.9481	5.19264	67.9146	142.718	35.2565	2.14932	270.107	122.035	10.9651	0.142645	250.227	18.7856	102.093	16.0607	149.42	201.335	142.29	27.8226	18.4513	23.9649	55.9995	111.344	0.478502	10.369	1.06851	1.47869	7.43181	289.086	27.2422	0.231861	34.368	0.346378	23.3916	1.22834	21.6179	64.7855	13.7283	124.846	32.3962	92.29	118.701	18.0555	121.547
TCGA-DJ-A1QD	0.173681	0.0355151	57.3049	10.266	0.0140316	19.8589	9.23331	5.03951	65.8311	105.924	27.745	1.73101	183.329	77.2887	4.21834	0.0656824	144.518	13.6378	93.8935	8.42047	185.263	149.715	78.6369	19.2361	10.7362	20.0353	35.8088	90.05	0.312131	5.30968	0.903183	1.93321	5.82203	386.743	7.00207	0.0976307	30.6186	0.234315	22.5907	1.21816	29.5737	92.1158	7.84553	93.5793	21.109	62.9042	168.881	10.9905	125.867
TCGA-FY-A3I4	0.0964816	0.0239842	22.956	8.14823	0.0124672	25.3541	8.06062	5.0141	58.8967	57.9986	18.9456	0.994799	191.071	75.6795	7.00192	0.0278333	61.3638	13.354	94.8808	7.92096	55.8346	98.3028	50.4722	14.0917	6.26718	21.2111	19.8209	34.4378	0.176017	2.97879	0.796833	1.52471	4.30617	100.828	2.83346	0.0825116	27.0101	0.131405	14.9953	2.25687	13.7747	51.7908	4.59164	93.3337	17.8322	36.9345	117.112	16.1285	78.6872
TCGA-L6-A4EQ	0.0603735	0.0152496	33.9404	3.40661	0.00751691	24.4082	11.2861	3.39048	45.3558	83.4399	21.7137	0.837509	253.849	133.25	4.91244	0.0603342	95.3906	18.2157	109.985	5.6938	167.998	89.9328	64.4127	21.4855	7.43027	24.1097	19.3923	22.565	0.133886	2.7297	0.86686	1.27899	4.21309	68.745	3.77453	0.0331017	28.6763	0.0931805	13.743	2.01056	9.66044	37.645	6.57307	61.4126	21.6913	43.008	77.794	16.192	69.5808
TCGA-EM-A2CJ	0.0823847	0.0166021	25.7787	4.54388	0.007043	24.5771	3.6131	4.1061	23.5901	95.2819	22.806	1.89978	262.035	106.061	6.17088	0.0628533	80.0243	14.8321	100.449	6.89975	69.877	118.977	35.8163	19.9213	5.1284	19.9327	8.70181	20.8018	0.106962	2.09637	0.801469	2.86928	5.10816	68.5778	3.93783	0.0223688	24.9107	0.0240393	10.5742	1.01144	13.7571	36.4177	7.09125	49.2116	14.6316	50.4828	69.3472	16.5627	83.7882
TCGA-BJ-A0ZB	0.157422	0.046894	48.3732	10.2899	0.0132554	22.7662	9.0596	4.74036	56.7347	95.5282	34.5133	1.55103	232.928	89.4896	5.33075	0.0753297	119.395	15.2159	91.3085	11.4226	215.133	165.451	98.4188	22.045	8.94913	22.6728	32.1725	73.2698	0.354702	6.49389	1.01995	1.70085	4.75829	332.162	10.6682	0.110037	28.0746	0.355387	22.3966	1.1895	23.52	64.7509	9.69682	87.3159	32.8651	72.4167	129.624	11.188	104.602
TCGA-ET-A3BT	0.100117	0.0176513	39.9474	6.12806	0.00864582	24.6446	10.1441	4.54055	46.2767	95.9324	21.7165	1.15097	211.141	88.096	4.70129	0.0637068	101.829	15.9515	106.732	6.27408	246.1	119.879	59.1913	19.2019	8.18908	21.9402	17.668	43.7005	0.198842	3.06315	0.826964	2.086	4.67341	137.207	5.59107	0.0374798	25.6897	0.120938	17.0705	1.67317	16.1761	61.1323	7.32983	66.248	17.4915	51.4351	106.449	13.5432	89.5241
TCGA-ET-A25G	0.304033	0.0681987	97.6757	25.8576	0.017788	17.8922	9.97218	7.10846	140.72	135.708	41.9934	2.24333	243.809	84.8355	3.63909	0.0729138	159.598	16.3712	117.911	15.0091	202.393	233.166	149.624	25.8554	15.7248	23.2976	57.7376	143.878	0.486249	7.24787	1.00103	2.24538	7.73751	799.414	6.84745	0.241048	47.1138	0.457895	39.225	1.64084	41.8351	130.297	8.43845	208.27	39.4572	69.483	203.966	8.40177	196.905
TCGA-EM-A1YE	0.152801	0.0464284	45.6179	10.8644	0.0121621	38.6873	4.94197	3.69606	18.8766	104.958	28.1246	2.25147	277.762	105.864	11.6764	0.0657014	46.4047	15.3171	90.1132	9.02229	53.4632	148.961	50.3989	28.0435	13.6293	22.595	9.33734	16.8638	0.09444	2.19704	0.780628	3.71346	4.22913	71.8859	4.74246	0.0501933	34.4385	0.0451916	9.96674	1.43243	22.6018	32.4344	9.19375	51.8023	26.8346	55.7472	84.5455	21.0426	100.63
TCGA-DJ-A2Q1	0.0821261	0.0292085	13.2677	10.5041	0.00858713	21.8026	8.93473	5.48778	82.8792	71.0747	28.8334	0.591887	175.03	51.741	5.05069	0.0189768	63.8465	12.7832	97.3772	15.5068	65.6853	85.676	90.5149	21.3151	4.12772	23.4696	28.5989	42.0212	0.254685	4.63417	0.79104	0.98247	2.33692	141.712	3.11168	0.106163	29.4969	0.248268	19.5105	2.37483	8.80225	42.2869	8.38604	132.446	35.3749	39.2311	77.6065	7.11392	70.7615
TCGA-EL-A3CV	0.0527031	0.0116695	9.53962	3.69919	0.00656464	16.933	5.429	3.87922	31.0727	41.3427	17.7752	0.453076	106.619	39.4829	4.58095	0.0165791	53.7889	8.54621	73.7493	3.66811	63.7959	90.6192	27.3994	11.353	2.23318	16.7263	20.1431	42.2218	0.200409	4.12924	0.736787	1.28874	2.52172	63.8211	1.12197	0.0393348	14.571	0.149636	13.8424	1.48451	9.8034	40.4405	5.43974	76.811	12.3325	43.9838	76.424	8.33539	58.3467
TCGA-FE-A239	0.272183	0.0177637	60.8911	5.62538	0.00640177	31.6152	2.56017	2.74828	10.9836	87.1597	27.2422	0.436481	284.044	137.435	8.10409	0.0436812	78.8969	17.3902	95.7795	2.13313	86.0718	74.5735	21.6731	23.3237	4.77918	21.8157	3.61989	27.7402	0.0660958	1.034	0.74403	5.15831	4.92722	42.6535	3.59251	0.0178292	21.5134	0.0285288	5.73855	0.982172	35.9835	40.8535	6.02016	50.7881	14.7897	53.388	34.6346	18.8336	102.623
TCGA-EM-A3SU	0.0567732	0.0155127	9.42949	3.54199	0.0096263	15.9378	5.47063	4.3291	39.8121	55.1425	16.7705	0.449135	132.989	50.3075	4.2348	0.0331841	65.7202	11.8321	86.6342	5.99952	81.1069	80.5934	56.7671	13.1366	4.12712	20.3491	23.7518	32.3179	0.231973	4.39754	0.746451	0.883623	3.06219	80.4838	2.29598	0.0595508	20.6398	0.147162	13.8908	3.20964	9.91671	28.5874	7.06014	87.5846	17.6612	24.6918	72.197	7.98936	62.6177
TCGA-EL-A3H8	0.110366	0.0169995	35.887	4.54761	0.00949673	19.9857	8.79445	4.16746	48.9684	85.5584	22.4822	1.2707	188.221	95.0054	4.06481	0.0505319	103.416	14.0416	98.5658	5.17495	215.456	129.906	55.5188	17.2951	9.19427	19.7816	25.3062	47.9369	0.177075	3.26316	0.877338	1.94076	5.01795	162.93	3.58497	0.0454074	21.6881	0.138518	19.2796	0.969853	19.757	64.9651	7.75011	72.3526	13.5776	62.4777	107.622	13.3807	91.6735
TCGA-DJ-A4V0	0.0355203	0.00954063	7.18698	1.77129	0.00668523	18.4528	2.25622	2.84269	16.947	27.8704	14.4595	0.485989	117.219	47.0328	4.93131	0.023707	43.2264	9.48208	57.0551	3.69219	36.2468	64.6451	20.2172	11.2722	2.1908	17.6267	7.3559	18.8653	0.126288	2.28333	0.683998	1.42415	2.54267	32.8944	3.27951	0.0280438	11.8784	0.0593484	7.28939	1.7578	5.26245	15.5018	6.29352	51.5253	11.7981	28.0973	41.8831	10.5962	26.5904
TCGA-DJ-A2PN	0.146955	0.0249412	40.8728	5.71053	0.0119364	16.3013	6.11833	4.75579	50.4351	78.9719	22.8903	1.28214	183.293	80.7327	3.22861	0.0414793	88.7686	13.4312	95.4065	6.96587	120.173	128.451	59.4353	17.1905	7.77839	19.4878	21.4026	42.0233	0.196645	3.10045	0.877572	1.59695	5.14051	161.141	2.56049	0.0662792	28.2831	0.132807	17.3384	1.05112	23.0138	58.2991	6.48922	75.5989	15.6938	49.7148	128.976	9.75136	88.5741
TCGA-EL-A3CO	0.0316092	0.0113758	6.39783	2.84555	0.00727711	23.1208	4.49291	2.85301	16.4414	33.7763	13.7549	0.462981	114.607	44.9699	6.70416	0.016002	45.0787	8.50627	61.1512	3.57008	33.2184	63.2893	17.6658	10.008	1.74293	16.471	12.7189	27.736	0.148728	2.98993	0.668288	1.62422	2.67501	23.2989	1.83243	0.0301123	12.3596	0.0588264	6.80092	1.38979	5.68638	25.117	5.73756	54.4591	10.3565	35.56	72.0463	12.685	37.5775
TCGA-FE-A23A	0.0554143	0.0483193	13.7653	6.80421	0.0107042	19.6152	5.27453	4.92531	79.0559	56.934	38.3764	0.60373	188.114	78.6319	5.29436	0.0273528	72.283	15.5342	97.9546	11.2665	73.8158	100.905	99.8797	24.9221	5.06641	25.2529	35.8758	69.1508	0.294414	5.30539	0.933668	1.06038	3.06616	238.89	3.26122	0.162427	28.5503	0.401784	22.4109	2.52037	7.49061	30.6572	7.97221	124.456	49.311	48.6869	60.5352	7.87024	61.346
TCGA-DJ-A2PP	0.25489	0.0245126	80.5569	7.24962	0.0110199	22.1841	7.44901	6.51408	23.7379	111.904	19.3646	1.7412	205.433	74.1542	4.38523	0.101082	104.924	11.4807	81.9046	4.97609	101.988	204.327	37.4689	17.7745	9.25958	16.3531	13.8085	59.177	0.168455	3.56384	0.808528	4.57698	5.71448	149.843	8.71158	0.051054	31.0709	0.0615616	11.6944	0.432197	35.1969	62.8067	9.72609	48.7497	9.71688	65.6162	212.624	12.0495	114.13
TCGA-EL-A3N3	0.0336619	0.00697102	6.22202	1.3429	0.00588019	20.1856	1.91273	2.06833	9.08503	28.0215	11.7819	0.44959	109.452	47.3267	4.48159	0.0218579	61.7867	9.14802	58.4089	1.80263	75.1166	78.5148	11.2664	9.45491	1.59868	15.363	5.68469	21.7963	0.111148	1.67283	0.6772	2.73454	2.60794	42.6247	1.76131	0.0162694	10.0789	0.0351351	6.00249	0.985309	5.79293	19.1869	6.66591	36.5966	7.04113	36.5053	35.7281	11.3418	34.496
TCGA-ET-A25R	0.109588	0.0374892	36.0098	8.70732	0.0139862	23.5264	8.56811	5.50156	74.001	95.8615	32.6561	1.39881	214.191	88.4534	4.76582	0.0603568	95.4002	15.921	101.325	10.4162	157.062	147.134	87.1212	20.5708	8.23645	23.8916	29.5676	67.2573	0.303106	5.0549	0.974859	1.67292	5.21606	327.678	7.72052	0.110796	29.4051	0.300973	25.439	2.08106	17.4729	62.6116	7.76557	102.044	34.2949	57.167	107.419	14.2065	111.401
TCGA-BJ-A18Z	0.118346	0.0222885	32.0055	7.53116	0.011558	25.3288	9.67665	4.76814	58.0498	75.0589	22.2832	1.1219	187.14	67.3212	5.16468	0.0295244	80.4682	12.2415	91.031	10.9364	105.517	110.513	69.8313	17.0504	6.14353	20.4973	28.1655	49.9465	0.236536	4.08534	0.836678	1.64829	4.27498	164.088	3.29118	0.0730179	26.6179	0.178937	22.0768	1.44121	15.9382	65.2772	6.58651	97.4508	18.0615	45.8165	110.461	14.9459	87.2811
TCGA-EM-A4FK	0.201842	0.0106826	98.5598	4.42663	0.00707904	24.0094	4.96727	5.22965	14.7232	115.752	16.4266	1.37942	234.055	87.8992	4.39725	0.0818403	113.271	13.487	95.2627	2.89532	93.6513	172.666	34.0375	16.9313	9.67259	17.5455	10.2286	31.5105	0.112851	2.29726	0.769274	3.57077	6.85439	70.6198	10.5101	0.022156	23.0525	0.0320519	8.11337	0.611645	34.4749	47.9588	7.5562	40.0767	8.00604	55.5864	192.747	14.685	113.518
TCGA-EM-A1YC	0.810818	0.26908	171.925	63.6304	0.0304251	39.0754	2.72523	6.17247	46.536	264.421	28.342	6.74402	244.247	84.1166	13.8712	0.272297	130.437	13.3694	82.6941	23.1309	176.264	799.561	145.552	26.6979	34.0365	16.7099	22.6461	138.213	0.470017	10.8892	0.901448	7.45763	7.02783	1996.27	24.9489	0.25453	55.2478	0.318718	12.773	0.591154	92.0369	94.9622	21.4233	112.255	25.7747	82.1499	242.539	18.9171	341.304
TCGA-DJ-A13T	0.101175	0.0194327	39.8374	5.64035	0.0132281	24.3115	7.41656	3.90808	52.6013	90.1318	24.8421	1.65578	209.273	111.259	5.4027	0.0573914	114.357	14.8944	97.3923	5.91406	143.967	116.475	49.5101	18.9222	7.99811	19.7804	26.4084	48.3321	0.20191	4.79344	0.89459	1.65581	4.38953	120.463	4.91629	0.0480643	23.2884	0.131444	15.2242	0.997213	18.5486	54.2131	6.80802	73.9851	14.5123	63.7807	99.3563	16.2995	90.0335
TCGA-BJ-A0Z5	0.117158	0.0566526	40.3624	9.40136	0.015789	27.6593	9.95945	4.85467	59.7528	107.383	32.0851	1.56833	248.879	95.1128	6.40783	0.106499	131.638	16.009	95.6994	12.8831	174.068	147.849	110.443	23.3717	12.2598	22.606	41.3393	82.8851	0.321009	7.09025	0.972717	1.69075	5.48453	308.858	12.09	0.133548	34.6541	0.290533	20.5461	1.29079	17.0929	57.9751	12.4704	108.029	30.0345	60.8487	118.324	12.3598	110.132
TCGA-DJ-A2PU	0.0806408	0.0126076	28.7769	3.90515	0.00922527	23.1443	6.57641	3.26463	34.3216	69.7775	19.0429	0.941454	190.808	89.2483	4.06517	0.0414358	56.1605	13.5428	89.4764	5.30323	128.538	82.9592	38.2954	15.4945	4.76205	21.0744	13.0951	28.3221	0.148566	2.36196	0.805898	1.47016	3.86947	76.4351	2.34425	0.0385737	19.1649	0.106388	12.0736	1.59105	14.2773	44.3825	5.46807	58.8768	13.2534	44.9455	71.8667	14.3116	66.3152
TCGA-FE-A3PB	0.0623596	0.0272195	11.6915	4.9884	0.00891807	27.7372	6.19539	4.41785	36.0545	55.8434	25.2893	0.633272	163.9	63.713	8.53113	0.0217876	72.4189	12.384	93.0279	9.50814	74.0265	95.3866	66.5902	20.7497	3.72552	21.4131	30.3208	40.6007	0.206626	4.7025	0.800464	1.26689	2.72555	121.863	3.14673	0.0688065	23.7242	0.20112	18.2313	1.49926	7.57295	35.7414	8.66898	83.9019	25.6998	52.2886	69.9816	13.6297	59.3187
TCGA-DJ-A2Q9	0.0491896	0.00274612	3.30596	1.71773	0.00259182	5.60291	3.22576	2.97324	14.2377	27.6111	13.0493	0.158303	104.581	29.7735	1.88794	0.00468703	23.077	7.95175	85.0626	1.88754	27.1926	43.3997	12.2335	8.00086	0.473775	16.7578	7.67196	15.9183	0.13327	1.4255	0.672304	0.602466	1.37418	26.3042	0.076279	0.00715346	11.9674	0.0520759	5.66869	1.77	7.86575	23.4607	2.84568	49.5548	8.24621	30.1698	56.3916	3.79548	42.4689
TCGA-EL-A4K0	0.0718634	0.0145125	25.3452	4.05733	0.0135626	23.6961	4.00598	4.18377	44.7458	69.9323	14.1127	0.887908	156.876	74.8823	4.32178	0.0352431	83.9969	12.309	79.2533	6.29511	96.8164	93.16	39.3887	13.0121	4.60837	17.9701	19.6051	31.4379	0.221836	3.12441	0.777622	1.01759	4.20729	78.0297	4.7939	0.0662731	15.9686	0.103651	15.3112	1.18549	12.173	45.3947	5.79968	76.4197	9.04882	36.1425	91.9576	17.4922	54.6975
TCGA-EM-A3AL	0.0750746	0.00840622	15.9622	2.23352	0.00517514	18.5456	2.94721	3.09407	11.3209	41.5803	17.5032	0.741611	207.126	80.6961	4.87867	0.0245852	48.7415	11.1133	84.8518	3.84882	47.3198	77.8285	22.597	13.7032	4.58078	17.434	6.42304	16.8838	0.0959414	1.89453	0.738129	1.86318	3.73929	42.0441	1.70243	0.0177103	19.2744	0.0222499	5.99937	0.430365	10.2493	29.8213	5.56169	41.4297	8.35054	47.3397	88.2375	13.4878	43.285
TCGA-EM-A3AP	0.0947113	0.021807	27.9651	4.75181	0.0134676	34.9139	6.31764	5.17354	32.3633	75.7131	24.2255	1.39244	198.581	76.4157	8.16652	0.0450787	81.1748	11.6299	89.2828	7.52565	37.8227	117	39.4266	19.3699	6.37971	17.4155	16.3316	31.8276	0.224009	4.65529	0.796632	1.91582	4.451	89.5813	3.46564	0.0507334	27.6765	0.072302	11.9143	0.760174	16.7659	35.327	7.20579	85.3324	12.3249	64.0383	97.3446	18.0019	79.3566
TCGA-FE-A3PA	0.0432363	0.0199242	10.9269	3.52535	0.00934909	32.2733	7.60397	3.72896	40.7876	61.6435	21.3684	0.576428	218.647	87.752	6.24098	0.0274184	69.8382	13.3596	92.6362	8.86777	75.5613	84.6572	88.8711	21.5254	5.90009	20.8996	20.9932	23.6348	0.136166	3.77231	0.802694	0.707317	2.86824	54.1972	3.51818	0.0589171	23.5631	0.0960678	13.8838	1.04648	4.82085	25.6294	9.94333	89.6774	18.5524	38.1546	71.5085	16.1061	38.9901
TCGA-DO-A1JZ	0.0981781	0.0111866	25.6493	4.36701	0.00755688	21.8871	3.77609	3.30693	18.8659	51.9723	22.4159	1.79089	206.948	94.399	6.29578	0.0615811	61.2828	13.2509	74.2943	3.7474	122.246	102.136	19.1343	16.8286	4.47227	18.644	10.3185	35.7753	0.145923	2.65946	0.815801	3.07672	4.18382	89.33	7.24491	0.0241385	19.6716	0.0574432	7.60635	0.819742	15.9477	38.4131	6.72027	51.5524	13.5749	60.6823	90.6141	15.8939	62.9396
TCGA-BJ-A4O8	0.069178	0.0144899	15.8488	3.82942	0.00879773	20.7073	4.03871	3.88979	36.8309	64.0348	16.7101	0.542021	166.557	64.5886	4.46691	0.0253883	75.791	12.2766	87.584	5.95058	79.9903	77.2599	50.3801	12.4318	3.2831	19.4443	22.9445	31.5084	0.230596	3.32564	0.816909	1.02839	3.58438	89.3966	2.47874	0.0515215	18.6952	0.14188	13.6904	1.42404	9.95608	46.6813	5.33954	84.3241	13.4626	36.9324	85.4053	12.3379	65.3481
TCGA-ET-A39J	0.139469	0.0229032	37.8863	7.28723	0.0122375	29.9908	8.99381	4.05559	51.6976	78.3441	23.9996	1.16265	216.564	87.0267	6.68811	0.0347913	95.8708	13.7391	113.129	7.16553	141.575	105.276	49.1476	17.4876	6.5175	20.4712	28.6245	45.8283	0.190758	3.63039	0.852154	1.54268	3.98645	125.726	1.82226	0.0708932	26.3575	0.126054	20.3367	0.973035	26.3198	71.1602	5.6902	84.0018	12.9181	59.3988	117.378	15.044	85.5902
TCGA-DJ-A3VI	0.102099	0.0343199	31.1682	6.72032	0.0120863	21.3876	11.4388	5.89415	62.1538	99.2303	38.3193	1.01058	242.24	107.165	5.14252	0.0716035	120.206	17.9349	119.794	8.65149	193.709	161.634	97.7139	28.0291	11.9343	22.9001	35.4921	63.1481	0.257623	5.55739	0.982487	1.99485	5.07828	267.992	4.9057	0.0876119	36.1829	0.199848	27.0285	1.12048	15.3997	52.6396	8.96393	89.0681	31.6789	68.5146	118.941	10.7215	108.875
TCGA-ET-A3DP	0.0917707	0.0173676	23.7354	4.78949	0.0101886	27.1386	7.4108	3.30476	22.8778	61.9169	21.8042	1.82489	182.805	90.1971	8.14377	0.0553448	85.2971	12.1556	79.1546	3.9384	138.259	149.083	26.7878	19.5854	7.42569	17.9549	14.6117	44.7072	0.172266	3.8099	0.802843	3.57332	4.42817	122.191	6.19887	0.0391605	22.7555	0.0729223	10.5012	0.586128	15.0496	58.2062	8.14731	55.1277	13.7099	74.2013	148.67	15.4093	79.5445
TCGA-DE-A3KN	0.0782911	0.0121723	22.4314	3.88298	0.0106387	32.7582	8.33204	4.43942	37.2197	66.2172	16.1029	1.25899	178.727	75.5039	5.82126	0.0361631	57.081	11.5981	85.5088	7.94935	77.4807	101.173	59.6373	15.7517	5.67315	18.5885	14.8786	22.7639	0.168478	3.19485	0.773125	0.70569	3.95753	37.6728	6.17279	0.0436266	16.2012	0.0802627	15.2736	1.50573	13.0135	33.5799	7.80173	72.1122	12.1818	38.1098	83.5786	24.001	52.9194
TCGA-ET-A3DO	0.057434	0.0303861	13.7222	6.34101	0.0100788	18.6663	5.25672	5.04644	62.2244	63.443	30.6459	0.654355	152.447	57.7242	4.9904	0.0291537	86.238	12.971	93.0652	8.32399	107.085	103.377	74.9996	19.9659	4.47333	22.046	36.507	72.4958	0.310578	6.2538	0.833232	1.25849	3.06061	183.098	2.77455	0.105822	25.3161	0.286474	22.2639	2.16123	9.04011	39.786	9.18765	119.351	30.5367	48.0887	72.5222	6.92019	74.049
TCGA-EM-A3FK	0.26181	0.0303994	74.4891	9.26723	0.0162195	21.258	17.05	5.75784	101.017	112.226	30.6596	1.64007	220.819	101.832	3.65572	0.0456487	158.804	15.1984	125.803	7.74675	160.674	145.862	84.9021	21.4683	12.929	20.4201	43.6306	81.5395	0.261765	4.73431	0.968788	1.7382	5.15267	276.863	2.71347	0.0933312	35.6113	0.195564	30.4036	0.819212	46.1427	101.734	6.47417	119.121	16.755	75.7195	179.897	10.9998	131.851
TCGA-EM-A4FM	0.09039	0.0348819	23.1297	8.34151	0.00928966	30.7352	10.539	4.86677	64.2925	77.5947	31.0162	0.734967	217.714	77.0324	6.62296	0.0274465	82.478	14.6384	112.655	10.1674	133.992	117.487	100.787	24.1323	7.4067	22.9038	34.1263	51.6727	0.241629	5.3351	0.881614	1.65665	3.33677	235.668	3.34381	0.0943041	34.9279	0.288164	25.8119	1.32869	10.9922	61.3541	8.21698	109.77	29.9564	59.9695	119.243	12.9659	96.7287
TCGA-DJ-A2Q5	0.0353072	0.0114571	8.2273	1.90718	0.00704965	22.2115	5.09382	2.96014	30.5586	40.2501	14.1686	0.393	132.991	55.4856	4.42199	0.0260702	56.676	10.7905	71.6294	3.85245	94.8748	73.3258	32.0013	11.3597	3.03689	18.8412	14.675	25.0141	0.144578	2.881	0.709387	1.28818	2.50186	54.0366	2.20911	0.0349675	17.1576	0.0885578	11.046	1.76623	5.90079	25.0186	6.32723	70.991	11.0141	28.5854	50.1115	11.4221	43.1579
TCGA-EM-A3SX	0.0578802	0.0110388	19.6504	2.99929	0.00926221	24.8133	4.39577	2.98766	28.8268	62.3877	20.6642	1.02037	209.15	119.163	6.06401	0.0365146	104.359	15.3589	97.6902	5.09434	86.3155	78.2401	35.904	17.1991	4.797	20.4068	15.095	23.0267	0.129512	2.51377	0.852035	1.10143	3.66697	53.2175	3.77166	0.0270325	15.2359	0.0695478	10.7403	1.00054	9.82343	29.5196	7.05969	55.8575	12.4221	50.4577	69.6189	17.8634	48.4789
TCGA-EM-A3SZ	0.0833262	0.0342605	21.4316	6.66997	0.0121015	21.502	11.7907	6.39901	75.3457	84.3467	31.3489	0.990804	186.015	79.7138	6.02026	0.0592887	140.947	15.2346	108.431	9.75396	190.471	147.604	115.705	25.5099	10.3526	22.2229	53.6984	95.4917	0.349248	8.7744	0.881724	1.59021	4.70474	231.78	6.94548	0.0996322	35.1138	0.268452	26.4997	1.87137	12.3519	53.9542	10.1209	134.576	31.7449	51.8533	114.592	9.86645	99.1907
TCGA-EL-A3GY	0.0628759	0.0149626	19.4424	4.82185	0.0077325	16.8294	8.14977	4.26383	50.4737	68.9704	22.8563	0.933389	172.029	81.3093	3.81673	0.0432605	86.3822	14.6104	102.664	4.97603	172.778	99.1591	55.8267	18.0868	5.41625	20.7363	24.9964	51.638	0.213807	3.45607	0.847316	1.35445	4.11341	105.015	3.78494	0.0382929	20.6967	0.143592	14.9906	1.80403	12.1515	45.7462	6.27493	78.5493	18.8794	48.2518	108.354	10.1999	76.8478
TCGA-EM-A22P	0.0266425	0.00700116	6.11461	1.40864	0.00589909	21.2381	2.65761	2.59551	14.4578	29.5103	11.8299	0.371364	111.798	48.8962	4.76715	0.0166689	52.3606	8.99662	64.2176	3.3088	27.4618	55.4039	18.8309	10.0088	1.84418	16.82	9.22175	14.0562	0.106775	1.89198	0.631568	0.991944	2.17303	21.7667	1.04496	0.0200666	9.2466	0.0423844	7.07814	1.98408	4.7583	18.9428	5.92195	47.4201	8.02957	24.8119	38.8351	11.7571	30.0977
TCGA-EM-A1CW	0.0946615	0.0227327	25.6459	5.06291	0.00789178	24.5653	7.86383	4.95052	21.6487	65.1195	21.4683	1.51139	154.127	54.7249	7.77667	0.0636337	58.9281	11.4651	75.0655	6.29038	51.9388	144.382	48.0974	17.9517	6.36143	18.416	14.9741	41.2037	0.190949	4.53515	0.707637	2.77039	3.92166	121.633	8.259	0.0521735	32.2228	0.0915536	9.34808	1.39188	13.217	26.8938	8.68486	53.3917	21.3136	41.9373	128.327	10.3604	81.907
TCGA-EL-A4KI	0.0789462	0.0121668	39.3615	4.66588	0.00577431	36.4249	8.19024	3.49931	13.9034	125.323	20.2978	0.460555	315.434	118.018	7.65457	0.0333695	102.68	16.4831	147.453	5.05496	46.4586	72.3659	83.972	25.3849	5.50733	23.1442	9.08366	10.8009	0.064386	1.69737	0.658668	0.760779	3.0189	26.4755	2.45923	0.0322618	24.8447	0.022512	9.93114	1.12689	11.7117	18.2753	6.27062	73.4021	13.3705	37.1117	48.5731	19.0513	80.7711
TCGA-E8-A437	0.076136	0.0324751	20.6262	4.65647	0.0106669	29.6891	3.74566	3.66813	29.4252	69.8654	22.7983	0.809209	216.359	97.7976	7.3911	0.0326673	78.1959	15.5575	99.7205	9.68486	91.9351	91.9159	79.8479	20.1425	4.63788	22.3412	21.3063	27.1407	0.156426	3.0621	0.872166	1.31059	3.73005	105.531	4.18977	0.0825261	22.8555	0.14093	14.185	1.06517	8.15278	34.2463	9.32867	64.1159	21.2895	49.0503	67.8138	15.9922	56.0028
TCGA-ET-A2N0	0.0822177	0.0572088	27.5792	10.9928	0.00902264	34.9365	23.1485	5.37118	64.5534	111.355	32.9519	1.21977	259.281	90.387	9.7835	0.0725807	112.806	19.0233	142.932	20.4126	175.608	115.259	186.951	36.838	11.4292	27.547	42.8125	41.1633	0.178182	5.78714	0.749735	1.64313	3.23802	154.482	6.19322	0.159499	56.3489	0.171361	20.4276	3.92952	10.613	36.3407	10.936	105.594	55.6922	36.0819	110.141	11.2562	135.722
TCGA-BJ-A2N9	0.0727627	0.0275847	19.9789	8.91811	0.0053882	30.4453	5.76966	4.08122	29.3871	105.692	25.8629	1.04175	221.234	75.7082	11.4479	0.116746	66.061	15.4595	90.5192	7.32748	119.257	128.504	102.908	29.1169	5.47196	22.3993	13.9302	31.5298	0.138138	4.57095	0.70433	3.2494	3.359	107.918	17.8165	0.0472967	26.0315	0.0852794	9.01038	2.2523	9.7003	21.2631	10.8718	43.1438	34.6682	40.807	156.243	10.0905	105.475
TCGA-EL-A3GS	0.227112	0.0498776	62.9153	14.9024	0.0166367	16.0615	9.76276	7.17958	82.1893	104.683	39.6619	1.61843	225.285	87.1352	3.91092	0.0564989	115.037	15.3435	108.306	9.08037	164.668	184.501	81.1772	22.8107	13.7055	21.7426	40.2024	114.752	0.376258	5.51365	1.02526	2.37384	5.23278	408.029	3.64613	0.154204	42.3498	0.242724	23.1764	1.23841	42.3595	87.4197	7.4658	98.93	28.177	74.7176	185.249	8.19031	155.812
TCGA-EM-A3OA	0.157519	0.0166241	44.8007	4.53437	0.00721684	25.9045	11.5686	5.07226	16.8152	98.0614	18.7969	1.42663	204.309	77.1127	8.15542	0.0978682	115.874	12.4745	90.1671	4.91513	136.52	190.192	59.611	21.9878	10.1661	17.266	18.4217	35.6222	0.117675	4.68627	0.709815	3.72534	4.9485	103.05	12.9206	0.0357801	30.5703	0.0474402	10.4662	0.486466	19.2543	41.5645	11.678	40.9493	11.5402	53.7022	194.329	11.9504	89.8201
TCGA-EL-A3CR	0.0661553	0.0246275	11.8876	6.96053	0.00957457	34.4466	9.12304	4.49187	40.3049	62.2612	20.2917	0.494446	165.815	56.3211	8.46914	0.0216983	64.6555	11.8774	91.5003	10.7882	140.154	85.8813	74.1426	17.88	4.54128	20.8349	28.4771	34.3076	0.22093	4.93584	0.750646	0.680666	2.86458	76.5093	2.49909	0.0736608	23.7209	0.192005	17.4012	1.70929	8.38998	33.336	8.55081	99.0323	21.1866	38.4472	69.4228	13.6084	56.1851
TCGA-MK-A4N9	0.065523	0.0208765	24.5716	3.18386	0.0127064	38.175	8.07921	3.14197	42.8682	77.8872	19.688	1.35182	206.625	115.776	8.82096	0.0568535	88.8	15.0133	98.0298	7.19351	198.702	90.6884	59.73	22.0026	8.50985	21.1418	23.8877	30.7312	0.167664	3.77599	0.886518	1.16736	3.57844	91.3096	6.25277	0.0692741	22.0793	0.116068	17.4351	1.2114	10.82	48.6185	9.02615	62.2703	16.3573	52.8078	81.8634	23.5248	58.2744
TCGA-EL-A4K4	0.154049	0.0346725	43.282	11.7555	0.0108249	20.6923	13.4574	6.69585	76.9577	99.1247	30.2261	1.24865	187.529	67.9841	4.65514	0.041419	88.2369	13.3756	101.759	11.2278	120.124	155.764	88.1541	20.5612	10.9829	21.8172	31.6434	76.8447	0.284064	5.09808	0.878436	1.73722	5.93131	285.246	3.9739	0.105729	34.6681	0.297178	27.1928	1.82043	22.1448	85.2139	6.36232	119.265	29.7814	56.4974	195.298	12.8869	143.694
TCGA-DJ-A3VA	0.099727	0.0251055	28.002	4.33451	0.0143538	23.1019	8.16991	4.37076	44.5513	84.4867	22.743	0.977435	197.811	100.968	5.90818	0.0588901	128.932	15.3855	101.298	7.45535	143.955	115.829	69.4543	20.8775	11.7875	20.4703	31.0448	52.43	0.230222	4.77847	0.872664	1.76102	4.60392	136.452	4.99705	0.0753234	28.4247	0.150848	20.1472	1.15168	16.1272	44.9774	8.59624	78.6955	17.2002	52.8	85.8857	15.2785	77.4721
TCGA-ET-A25P	0.169525	0.0106094	40.156	5.11645	0.0123558	24.8535	5.84131	3.16669	17.495	83.3849	17.1144	1.69143	208.898	88.688	5.13087	0.0637399	81.6369	13.0504	92.7095	5.59118	82.2231	115.39	37.5621	15.6356	7.22588	18.7839	10.149	21.3129	0.169002	2.97861	0.757131	1.65442	5.17635	82.7592	7.25432	0.0404839	18.3703	0.0558315	9.00424	1.05205	21.1004	47.9193	7.26004	60.0466	9.17459	40.5995	82.9187	21.9549	76.8801
TCGA-ET-A25I	0.129443	0.0743076	26.5774	11.3499	0.016417	33.6163	9.64725	5.45284	43.9466	78.6395	30.7523	1.6572	193.508	58.7323	9.66763	0.0870794	68.2243	11.6698	72.3001	15.1084	72.6479	162.496	88.9246	23.0618	8.76728	19.8571	26.4297	73.8095	0.301256	10.3686	0.828684	1.4331	3.47801	269.441	14.1454	0.200563	38.4552	0.243866	14.4472	1.17581	14.6864	31.5508	14.0322	95.3244	33.7099	57.2524	133.98	11.6548	86.5093
TCGA-EL-A3ZH	0.0586993	0.0148559	16.3767	3.93325	0.00837231	24.9122	3.07264	2.88082	18.0468	57.6088	22.4253	1.57885	194.232	97.7435	7.59027	0.0461712	82.1088	13.9571	79.5354	4.21908	134.543	109.359	27.1235	21.6364	5.5648	19.2285	13.5964	29.0652	0.145179	3.38156	0.840215	2.78768	4.24999	64.5331	7.57965	0.0258964	18.8427	0.0408096	8.81778	0.746829	9.761	34.3317	8.83443	49.3578	17.6135	59.3277	88.7078	16.1318	51.8743
TCGA-CE-A3MD	0.0316472	0.0124312	9.75352	2.52703	0.00717084	23.5909	4.20708	3.49694	25.0559	44.793	17.6623	0.637647	183.611	74.168	5.08177	0.0304538	52.7733	12.4763	86.8975	5.81601	41.8364	71.6002	46.6736	14.8334	3.47743	19.866	15.9784	18.5989	0.137956	2.99903	0.779966	0.950856	3.22962	27.6983	3.84807	0.0326931	14.6474	0.0555776	9.97234	1.25874	4.17725	20.0049	6.55694	51.3996	12.6579	37.8607	65.1239	13.3421	32.5114
TCGA-EM-A2OZ	0.107197	0.0162494	41.171	4.6348	0.00782028	19.9157	8.05132	4.433	29.8675	98.2799	18.653	1.20352	182.447	76.9711	4.74692	0.0802959	119.837	13.2382	91.2859	4.70931	171.301	126.698	58.5206	15.6559	7.98741	18.7192	23.6926	42.0597	0.187246	3.49304	0.80612	2.25199	5.342	82.5967	6.69343	0.031823	24.8758	0.0883913	12.5939	1.0103	18.4404	49.5818	8.24514	51.061	12.5204	48.8595	159.021	12.334	106.884
TCGA-DJ-A1QN	0.0580688	0.0121115	26.1799	3.59864	0.00957004	24.7988	6.31876	3.13021	33.8808	67.5467	18.4391	1.01882	214.643	109.582	4.44589	0.0571148	84.0401	15.7783	99.2955	5.28536	116.559	78.3033	50.2117	16.7033	5.34092	20.7367	18.3743	31.9009	0.177538	3.56622	0.803489	1.61781	4.44059	52.2792	3.71314	0.0395327	18.5917	0.110245	13.015	1.67604	9.30962	41.1457	6.80591	72.2744	12.1206	40.5268	54.1998	17.4451	63.4112
TCGA-DE-A7U5	0.0899963	0.0223495	19.5531	7.73981	0.0111323	17.879	5.19149	5.07645	63.967	58.5312	24.0413	0.804004	157.93	62.227	4.83243	0.0244088	81.6456	13.025	97.0195	8.00756	72.4456	102.094	63.4913	16.2461	5.89167	20.9188	31.0472	61.1931	0.263655	4.43682	0.848862	1.3188	3.98832	166.874	2.91611	0.0837642	25.2818	0.204641	20.539	2.09082	12.3683	58.4846	5.97223	125.395	22.7923	45.2582	94.1303	10.0845	87.9346
TCGA-MK-A84Z	0.0825818	0.0377575	26.6028	6.24075	0.0140152	38.6333	5.67243	3.93488	25.6724	73.781	20.8273	1.45732	218.834	87.0879	9.82577	0.0621383	100.512	12.4361	82.3171	9.17038	61.3703	111.011	62.8027	18.5643	8.57652	18.9689	19.2468	34.6114	0.179737	4.27392	0.816891	1.38941	4.4545	70.3747	9.60503	0.0691564	26.3809	0.0647265	11.8273	0.872474	10.544	32.919	11.2485	65.8536	15.4656	53.516	97.7131	22.5001	62.3861
TCGA-EM-A2CO	0.682102	0.174811	108.847	33.7358	0.0257002	44.2345	8.36392	6.44714	36.5022	173.59	38.9809	2.70438	222.811	69.8402	13.9327	0.146563	90.7176	12.3279	70.6001	17.931	73.5912	271.556	105.412	30.6053	16.3261	20.8752	33.9902	105.446	0.505144	14.0308	0.850449	5.13732	3.96488	793.942	24.393	0.355999	41.9654	0.321056	13.7346	0.764255	82.4748	58.1156	20.9184	81.8514	44.0846	94.2255	160.817	14.7254	149.913
TCGA-EL-A3ZM	0.177234	0.0729468	47.7116	19.5278	0.0111987	33.6857	18.7991	7.78758	125.142	194.09	33.23	1.10029	202.755	75.3341	8.57793	0.0605002	203.684	15.9467	144.503	26.8331	439.194	252.302	292.042	34.7223	11.7674	24.1453	83.3482	61.142	0.28252	10.0109	0.787905	1.12385	4.3305	250.434	10.7331	0.152334	42.6013	0.282231	39.7635	2.11382	23.625	97.2181	12.1199	178.985	45.6162	46.0924	215.646	13.0659	207.374
TCGA-BJ-A190	0.169444	0.0322227	46.6422	13.766	0.0109317	26.9183	1.93398	3.96623	35.1202	92.0456	26.7888	2.86499	240.448	103.227	8.27316	0.151061	95.9767	12.9923	69.2978	7.38045	74.287	249.949	46.643	23.2578	6.73232	18.5788	10.7803	49.9381	0.296005	4.48506	0.907811	3.59359	4.95059	451.541	14.7084	0.0490049	21.547	0.109664	10.4127	0.467118	27.1658	31.9653	9.76266	60.7232	18.9397	75.2388	141.565	16.2625	88.7225
TCGA-BJ-A0ZJ	0.0281772	0.0090925	9.03837	1.4999	0.00595841	22.8521	3.53993	2.44816	14.9837	36.7811	13.4772	0.497752	138.244	58.2588	4.78274	0.0274216	44.0166	11.2032	70.7286	3.60746	45.5338	60.911	22.6526	11.5439	2.38988	19.4638	7.22125	14.0403	0.0999832	1.81165	0.656213	1.62472	2.59156	26.4844	1.88122	0.0246202	14.9773	0.0437938	6.63852	2.35318	4.48045	16.6052	6.2025	45.3798	11.2483	26.1162	41.7986	11.4259	37.435
TCGA-DE-A4MA	0.0794924	0.0542017	29.3576	9.9896	0.00945024	30.8739	18.5268	5.50775	94.1332	118.139	32.6399	1.07643	272.976	104.586	7.22256	0.0513413	108.26	19.2923	149.214	22.629	226.334	117.822	207.647	41.1336	9.72991	27.9309	46.3152	37.8925	0.179597	5.80735	0.794142	1.06657	3.64056	202.501	6.79298	0.128456	58.5563	0.222385	22.9217	3.51087	9.56911	46.0275	9.38127	129.818	56.6664	32.6524	148.021	12.6422	130.568
TCGA-EL-A3ZR	0.0673425	0.0129871	14.4466	2.36094	0.00865108	22.8115	3.00839	2.96007	10.8426	40.565	15.0503	1.1329	149.987	77.7114	7.0664	0.0351265	60.1273	12.2055	70.381	3.9685	96.3527	92.7896	19.4068	14.8491	3.72457	18.1583	9.14789	21.3893	0.143139	2.57505	0.766861	2.41605	4.04858	54.0807	5.77388	0.0289543	13.3038	0.0525316	6.70676	0.86037	9.36757	29.9557	6.8903	38.3212	11.2331	47.2645	76.3074	15.4608	50.015
TCGA-DJ-A2Q0	0.403237	0.0819159	46.6583	16.4395	0.0175493	31.0115	13.6713	5.76638	19.0649	135.866	28.8593	1.9783	205.562	63.7787	10.3106	0.128943	86.207	11.2192	80.0171	11.9815	60.6189	286.581	75.5716	22.6187	7.05335	17.896	28.5697	78.9342	0.588077	21.6899	0.856311	3.14908	4.33515	480.963	14.4973	0.150886	24.9609	0.212024	8.97683	0.475314	39.8048	36.3599	18.4368	61.4303	24.3898	72.3215	159.699	10.5957	108.171
TCGA-DJ-A13U	0.118872	0.0366795	44.3921	6.73262	0.0108528	21.0022	10.5697	5.05839	48.1808	78.1959	25.3762	1.63855	202.535	85.3777	5.25481	0.0807154	109.234	14.2104	85.583	7.0195	124.425	198.068	67.9606	17.7747	10.0231	20.2618	26.9155	62.9291	0.263387	5.47371	0.920937	1.94666	5.13608	230.108	11.7317	0.0687033	27.2493	0.169223	15.2698	1.05742	19.4458	56.5971	8.2881	68.1659	21.633	61.044	157.54	11.3652	95.2788
TCGA-E8-A417	0.057706	0.0202504	15.0717	3.22754	0.00921058	19.227	6.31688	4.06797	29.9151	65.1823	26.8074	0.760345	166.12	86.3001	5.75315	0.051446	95.6956	15.0931	91.5784	5.66296	127.395	122.254	67.2369	22.1761	6.62436	22.2868	28.2737	46.7459	0.226437	5.37226	0.89228	1.26937	4.26216	111.794	7.64782	0.0478282	18.9348	0.199178	14.3509	1.46733	8.81467	26.2568	9.576	68.9	27.8297	53.0732	75.1799	10.1609	67.0031
TCGA-BJ-A45K	0.0879958	0.00867335	27.7689	3.08312	0.00532234	20.4751	2.2755	2.85226	14.5936	47.2805	16.5752	0.983767	251.588	101.65	4.51414	0.0280685	49.1817	12.9499	82.5774	4.42765	32.7754	65.7676	22.3961	12.6633	6.06223	19.2361	5.40304	13.8529	0.093951	1.33495	0.806308	1.50078	4.06533	42.1429	1.93507	0.0183474	18.0972	0.0219817	5.59229	0.766659	12.7388	29.0788	5.58882	45.7006	9.7157	36.5407	93.7222	18.0597	53.6708
TCGA-E8-A2EA	0.047344	0.0194728	8.54718	3.75388	0.00802229	19.8452	6.66679	4.62162	38.9876	49.6321	24.0651	0.566394	151.575	57.5654	5.46161	0.022844	58.2804	12.8872	97.4306	8.18549	81.4781	93.7253	62.797	18.7341	3.39637	22.0777	28.486	34.4142	0.176528	4.61185	0.74446	1.11065	2.62458	77.6949	2.68764	0.0623631	25.4131	0.144233	15.1451	2.37419	6.1359	27.0857	7.7746	88.6245	26.3342	36.1879	67.6447	7.53864	59.2455
TCGA-L6-A4EP	0.0765012	0.0221892	21.3725	5.44528	0.00898853	27.9118	9.41989	3.60521	55.1379	86.5117	23.6872	0.751086	240.086	114.074	5.79591	0.0368948	107.305	18.2021	129.65	9.80512	176.48	75.69	101.767	25.1604	7.70526	24.3816	31.2317	27.9453	0.142679	3.58982	0.804562	1.24862	3.59803	65.4405	3.10062	0.0697343	30.1976	0.125197	18.2293	1.9275	9.69531	42.6223	7.99527	92.9551	24.8052	37.4241	75.6472	14.6154	65.9916
TCGA-DJ-A2Q2	0.122899	0.0122153	32.9289	4.57347	0.00635817	21.7163	5.83998	4.198	15.3391	71.9967	15.2557	1.7749	159.459	58.5367	6.3847	0.0524219	72.6849	9.77204	76.3791	3.88379	80.8865	133.395	32.729	12.9203	5.89833	16.0191	10.8893	29.6179	0.136442	3.30209	0.69598	2.50234	4.50896	66.2328	6.91893	0.0229943	21.6818	0.0421582	8.40629	0.638633	19.6654	35.3477	9.29147	44.5308	9.61406	41.1867	87.9455	14.0421	89.5697
TCGA-ET-A3DR	0.109935	0.0176866	34.987	5.06302	0.00946742	19.1635	5.0849	3.40962	50.7559	69.6994	22.7002	1.6764	217.24	107.193	4.08763	0.0382695	92.5315	15.3241	96.7673	5.73224	88.8837	102.382	33.5938	15.8805	6.76838	20.7991	14.5876	40.5882	0.156019	2.27779	0.906455	2.83953	4.26456	111.976	3.21999	0.0383902	25.297	0.0882629	12.9396	0.947028	19.4073	54.0457	5.72165	62.8141	13.1852	58.2	120.926	12.2119	74.24
TCGA-DJ-A3UT	0.086999	0.0226905	24.035	4.57813	0.00870974	32.5737	5.87372	3.34943	19.6883	63.204	22.4953	1.4731	225.048	91.7378	8.90911	0.0589278	76.0059	13.593	89.4933	7.56358	73.484	113.603	51.9572	22.6652	7.64467	19.6956	13.7432	27.9143	0.12365	3.30551	0.795812	1.74735	4.0003	81.0656	7.7173	0.0424804	23.8265	0.0609977	10.2991	0.92768	10.4816	28.039	9.68373	57.733	19.0243	52.3254	90.7308	19.2341	59.1143
TCGA-H2-A422	0.143247	0.0394415	51.0565	7.57663	0.0135347	18.0187	7.04265	5.25686	59.3965	102.069	34.5157	1.46339	219.787	114.346	4.71815	0.0788456	123.375	17.2473	102.36	7.75733	164.968	167.388	94.6962	23.5447	13.813	22.4982	34.3625	84.0742	0.298558	4.70891	1.03407	1.56991	6.02611	298.471	7.23695	0.0858419	32.6528	0.255311	19.3939	1.24355	23.2295	54.1946	8.35099	79.1277	32.8829	67.9712	108.906	10.7732	114.552
TCGA-EM-A3FM	0.121957	0.0780269	44.7953	20.1545	0.0146671	31.3898	24.8912	7.42591	137.028	130.186	35.4075	1.35048	236.133	79.1678	7.61784	0.0783492	129.636	16.9258	121.28	21.9845	274.775	173.635	205.946	28.9068	16.9481	26.5642	62.3901	89.6085	0.387625	10.5034	0.881936	1.28535	5.34003	397.682	10.9422	0.24379	54.9938	0.486831	35.9712	3.2505	16.1052	87.8318	9.58331	206.94	55.6559	44.8493	205.483	14.7899	170.401
TCGA-J8-A3YH	0.0383937	0.00934024	13.3517	1.69708	0.00666791	23.3618	7.03692	2.88437	19.5443	53.4238	13.6632	0.577472	157.648	85.7975	5.20151	0.0372671	51.4987	12.9834	83.8354	4.6039	73.6856	67.5906	42.2916	15.1616	5.05678	19.4153	14.8532	13.4884	0.118889	3.06524	0.705327	1.1044	3.28599	32.6894	2.67571	0.0258688	17.7942	0.0600931	9.05478	1.66207	5.68145	22.2419	6.14356	49.927	11.286	27.2966	70.37	13.5828	45.5262
TCGA-E8-A419	0.0457169	0.0267257	10.424	4.52379	0.0110415	19.5713	5.03134	5.20056	62.3848	52.1486	29.656	0.548985	160.535	67.2461	6.33169	0.0271656	100.795	14.541	95.9604	8.17946	103.022	104.922	94.4355	21.1612	6.39921	22.7566	44.2914	65.4462	0.298537	6.5367	0.868607	0.806919	3.47309	140.792	4.50692	0.118667	25.2177	0.255457	21.8937	2.16899	6.46824	30.7653	8.91782	126.771	34.2111	42.4088	75.2186	8.42626	63.7399
TCGA-DE-A69J	0.124595	0.0168563	42.705	6.56061	0.0107158	24.2036	11.1666	5.21209	60.7944	125.141	23.1753	1.31696	210.314	94.0764	4.2594	0.0618854	140.068	15.6663	118.679	5.94002	310.774	134.814	89.2644	19.4202	9.78366	21.2105	34.4121	54.1813	0.234983	4.84098	0.838875	1.86196	6.60883	146.165	5.93298	0.045556	28.9793	0.158285	22.0516	1.58523	20.6508	68.398	7.12436	97.9945	17.344	45.3774	147.781	14.9781	122.202
TCGA-EL-A3TB	0.0397462	0.0104477	16.6683	2.87028	0.00625641	25.9329	8.89187	3.50483	33.2851	61.7258	18.9465	1.03659	216.223	102.401	5.73381	0.0464318	68.0444	16.3219	109.004	5.58262	107.48	86.6557	49.5394	20.2492	5.00149	22.7012	14.9508	21.0363	0.120674	2.37185	0.788122	1.4976	3.66198	50.2534	5.04448	0.0254889	25.1993	0.0534862	11.262	1.96283	6.25521	31.8529	5.99706	58.7736	17.2127	39.8204	74.9575	17.6438	62.1054
TCGA-EM-A1CV	0.133057	0.0149612	47.0036	4.33251	0.00777568	23.7935	4.97672	3.09352	19.969	77.5121	22.1398	2.1703	227.238	115.754	6.47617	0.066578	88.4931	14.4499	85.6657	4.02432	157.572	132.187	25.4644	21.8208	7.82249	19.2688	9.15272	33.3891	0.138071	2.17221	0.845244	4.56157	5.21658	113.431	5.57138	0.0250941	21.918	0.056272	9.73561	0.625667	23.3262	49.3819	6.87723	46.9158	14.1441	70.3917	109.449	16.8016	81.9475
TCGA-KS-A41I	0.0987942	0.302044	17.88	17.1252	0.0316596	39.7563	5.11425	4.95436	54.1711	79.1016	42.9931	0.986389	223.519	71.2968	12.3417	0.0506423	66.6725	13.5776	79.4251	49.9463	35.9909	131.452	166.401	27.2692	5.32003	23.1841	43.7817	82.9032	0.524142	14.3061	0.991356	0.72549	2.55411	469.848	11.1989	1.12534	40.4958	0.668214	19.2977	1.04126	8.20678	31.7825	17.526	123.162	58.9344	67.5651	67.3793	11.5641	57.3143
TCGA-DJ-A3V6	0.140916	0.0459108	37.3564	8.82659	0.0146704	29.4317	7.922	5.46929	56.9336	99.3721	26.5399	1.2069	197.948	76.4535	7.09739	0.0599295	147.958	14.3913	93.2809	10.3544	233.576	160.345	104.555	20.2486	10.3667	21.5607	45.131	74.1018	0.379945	7.59613	0.873588	1.57454	5.55908	236.4	8.79675	0.133137	31.466	0.262977	23.994	1.60616	19.9448	83.0924	10.013	111.22	24.8507	54.6957	133.336	13.8514	116.295
TCGA-FE-A237	0.100384	0.0190128	36.0085	6.91313	0.0105628	26.3906	7.07257	3.94993	42.1962	88.8845	22.2725	1.17746	209.71	83.2183	5.74885	0.041013	103.149	14.6612	102.369	6.27813	146.433	94.1242	52.9198	17.7419	6.10543	21.2792	23.531	48.7168	0.241689	3.60018	0.857057	1.76679	4.83122	126.888	4.69995	0.0495492	22.9413	0.152952	16.0935	1.72038	17.4005	56.4257	7.4065	73.5056	17.1521	49.0075	93.1459	16.5512	92.215
TCGA-EL-A3MY	0.0883472	0.0158957	18.4905	7.30423	0.00671232	22.7852	6.92211	4.90443	61.3098	62.1647	20.9399	0.73238	158.084	56.0203	5.06001	0.0172482	84.6034	10.8572	90.1116	6.53018	86.8783	104.131	58.4839	14.5128	5.16662	18.7207	35.6605	45.4209	0.210729	4.32301	0.782745	1.20831	3.36989	158.74	2.15198	0.0431367	26.9944	0.198559	20.2008	1.17938	13.2009	68.2994	5.54797	120.798	16.6569	45.9477	151.669	11.5845	109.072
TCGA-DJ-A13O	0.100225	0.034935	29.8844	7.62464	0.0124381	27.9492	8.53923	4.52001	54.2278	79.8821	21.4325	1.14578	175.535	72.7987	6.83979	0.0565861	110.254	14.1427	85.6439	11.7325	126.694	123.404	83.6495	22.4205	9.18362	22.006	24.566	40.0411	0.253888	5.64122	0.727729	2.2737	3.99488	171.775	6.56096	0.117176	34.5939	0.154412	15.9523	2.18381	13.7811	45.9204	8.9949	97.5957	26.2697	35.212	104.942	10.7108	91.6881
TCGA-ET-A2N5	0.115312	0.0156528	33.1017	5.49787	0.00796551	27.5621	7.14902	3.84138	23.6038	80.5662	21.064	1.54044	187.934	74.7437	7.09057	0.0741853	78.1624	12.6827	75.8095	6.30068	113.345	113.907	55.2749	19.2447	7.61987	19.1095	16.1304	31.522	0.153195	4.05833	0.761466	1.53366	4.11244	98.6632	12.1506	0.0317456	25.607	0.065298	8.82751	1.20743	16.0173	35.454	9.95526	60.6627	18.6761	46.4448	123.71	14.7983	74.7441
TCGA-BJ-A45H	0.0584952	0.0153211	16.0673	3.8722	0.00869377	24.9939	7.40825	3.81714	36.638	57.6733	18.6702	1.02572	179.671	73.875	5.38623	0.0379543	75.9433	12.6416	85.3163	6.90376	141.67	88.7922	46.4877	17.1367	5.01399	20.1172	17.3235	27.4346	0.146039	3.06876	0.75164	1.57925	3.47153	58.2969	4.41923	0.0375771	20.9506	0.0774586	12.4729	1.48641	9.29664	39.9321	7.61642	66.0842	15.6254	38.8066	85.2365	13.1644	54.2653
TCGA-GE-A2C6	0.0867388	0.0239029	20.738	5.50542	0.0178688	26.5497	7.2036	4.04617	32.1843	83.7158	18.0128	1.40668	162.831	79.5809	6.11661	0.0654703	87.3284	13.4341	91.3765	9.26743	79.4019	100.749	44.5763	15.6764	10.0744	21.192	18.6263	36.0812	0.30947	4.27821	0.804481	1.76563	4.54903	98.8842	5.39475	0.0690796	22.4284	0.140529	17.4923	2.23645	15.5327	55.7289	7.49271	80.5351	15.0195	42.6569	66.9936	18.6342	65.0749
TCGA-EM-A2CK	0.0998634	0.0183185	39.1296	4.44495	0.00876443	27.1274	5.80576	3.21959	21.2612	67.8856	19.3847	1.5426	211.697	84.0904	5.57422	0.0647307	76.7515	12.3504	76.334	5.54079	84.4535	104.937	50.0001	16.2727	7.65645	18.4595	12.5719	28.6453	0.153114	3.08127	0.793868	1.8872	4.47777	95.6668	6.06625	0.0354117	25.0813	0.0642254	10.7351	0.734937	14.7805	38.3752	9.72752	57.6289	13.6226	48.8431	115.844	14.9968	70.5094
TCGA-FE-A22Z	0.132611	0.0925044	58.1061	17.5846	0.0176477	36.6703	13.6519	7.02465	119.106	142.413	33.3363	1.43888	247.29	94.2231	5.38988	0.0733794	131.693	17.1412	113.842	15.3513	353.215	194.423	130.732	25.1769	14.6407	23.0972	56.1375	92.8683	0.493575	8.97157	0.961258	1.73955	5.97565	529.894	5.94219	0.192315	46.806	0.431852	34.5908	1.43935	28.0202	107.582	10.8128	178.386	32.2484	64.5204	202.797	17.2085	186.632
TCGA-DJ-A2Q7	0.0564119	0.0149722	18.8844	3.13219	0.00849119	24.3789	7.08216	3.27409	30.0019	64.0958	18.8633	0.855605	194.776	98.3232	5.61639	0.0439961	73.8973	15.5059	98.8502	5.73649	105.241	85.5441	36.7653	18.0434	4.78168	21.9289	14.9994	22.863	0.127315	2.81657	0.78421	1.7093	3.45683	53.9591	2.65751	0.0356104	21.2648	0.0750626	10.684	1.90363	9.23486	30.6296	6.51352	56.5534	14.9843	41.1747	68.151	14.5639	60.8862
TCGA-E8-A416	0.0686697	0.0123711	16.7184	2.35575	0.00815521	22.7399	2.7817	2.99518	12.3516	39.9267	16.0465	1.0934	162.639	87.913	6.36923	0.0362066	64.8013	12.9211	76.0746	4.46474	71.3624	88.8054	21.9104	16.4079	4.55729	18.7754	8.75928	17.7753	0.130548	2.50755	0.763299	2.66642	3.88799	58.6676	5.32683	0.0276887	14.0245	0.0436873	7.46749	0.880973	8.79822	25.5756	7.36589	40.9768	10.9992	44.8595	70.7163	15.6048	44.763
TCGA-EL-A3T0	0.0467254	0.00857372	8.53636	1.96493	0.00593176	19.4623	2.52687	3.00126	11.9394	33.6723	16.3663	0.829005	125.72	55.772	6.88493	0.0316626	51.7855	9.51433	60.3906	3.47275	62.5942	100.801	16.382	12.4936	2.213	16.7339	9.01085	22.0424	0.117119	2.41366	0.685426	2.16056	2.90983	57.1301	4.69198	0.0191161	14.6185	0.0454581	6.44804	1.00717	6.77825	23.8739	6.54375	45.6441	11.17	38.5158	74.2546	11.4626	35.1594
TCGA-DJ-A3V5	0.121469	0.0230092	37.08	6.73112	0.0110346	23.0047	6.8811	4.88525	44.1887	81.6812	24.6251	1.33116	186.41	80.8055	5.56094	0.038356	95.2345	13.7386	95.3778	8.0585	170.587	136.776	68.1447	18.5037	8.36845	20.9676	22.9076	48.1906	0.241298	3.73352	0.872239	2.05138	4.84814	226.291	4.62655	0.0651738	27.1524	0.177059	19.0028	1.18506	17.542	67.5451	7.41081	82.4024	20.3916	59.7062	104.83	13.3809	100.781
TCGA-FK-A4UB	0.051938	0.0342256	20.0316	4.85869	0.0111938	34.7236	7.44168	3.09831	31.9099	66.8111	24.5024	0.68152	209.055	93.9692	6.70388	0.0315926	77.1251	13.7579	88.0918	9.28125	83.0272	92.3376	88.6541	21.6522	5.73062	21.4894	17.7044	26.4552	0.169599	3.20334	0.859086	1.02686	2.67561	82.4635	2.79	0.0840257	26.0123	0.146405	16.3729	0.924281	6.25424	32.2384	10.6686	74.104	24.2774	56.6751	53.3434	16.4517	40.085
TCGA-EL-A3H2	0.0743879	0.0138266	22.6901	3.27527	0.00839216	21.9684	5.03045	3.48196	17.4527	55.5721	19.8342	1.67635	189.682	91.9641	5.80541	0.0673178	94.9625	11.993	70.6489	4.67052	112.737	141.231	22.048	16.629	5.59905	17.6784	11.9291	29.4486	0.158965	3.01577	0.804149	4.15584	4.92355	87.4995	10.3344	0.0234543	21.7889	0.0420301	8.23751	0.533836	11.7353	42.1147	7.81736	40.0717	12.1902	57.111	121.244	13.6029	63.9603
TCGA-EM-A2CS	0.120707	0.0137369	36.6765	5.13756	0.0106662	27.0397	6.88065	3.88478	35.015	79.9027	17.5168	1.27028	202.565	80.752	6.32182	0.0506126	74.2518	12.4089	93.738	5.06583	136.589	103.045	43.86	14.7058	7.63405	18.7688	17.1927	37.811	0.179127	3.07587	0.80768	1.80906	4.09305	96.1587	4.96238	0.0430318	17.7434	0.126425	14.9539	0.771088	19.5468	59.3002	5.99774	63.989	10.037	53.5236	107.2	18.6289	77.4301
TCGA-DJ-A4UL	0.0408029	0.011123	17.4105	2.66761	0.00582039	28.1153	7.67479	3.0179	26.5625	65.4694	19.0718	0.691354	229.996	119.465	5.14349	0.0440004	74.9551	18.9449	123.891	5.36499	178.163	66.8378	61.6985	22.8126	4.66976	25.6125	14.7543	15.7623	0.101143	2.21548	0.756415	1.35686	3.2917	33.2285	3.14859	0.0270909	21.7646	0.0626253	11.0599	2.70933	6.03209	25.8355	7.93736	52.2889	20.765	32.8012	55.3723	15.0893	55.0286
TCGA-FY-A76V	0.0879928	0.0164687	26.2522	4.2565	0.0119588	35.8547	4.48668	3.69565	22.6515	64.5328	13.5832	1.03706	167.502	68.7364	7.59441	0.0451655	70.1273	10.5694	69.8442	5.42311	77.0262	100.875	38.8654	11.9042	6.75944	16.7706	15.0697	32.4454	0.181408	2.95866	0.72994	1.1519	4.1504	66.9084	5.2929	0.0505355	19.3269	0.0690223	10.3592	0.962529	14.6723	42.022	7.45635	60.5507	8.98498	41.603	90.2343	24.0316	58.5217
TCGA-ET-A25M	0.149212	0.0316786	57.3754	11.6425	0.0114907	24.6334	8.60384	4.60848	55.3083	98.2494	25.6805	1.62935	221.138	82.9951	5.14116	0.0491223	94.3803	13.6463	96.5055	9.43292	163.602	132.259	66.6033	17.4476	9.13597	21.1468	23.341	56.8992	0.250263	3.82828	0.907213	2.33525	5.07198	252.09	4.17554	0.0767918	30.3625	0.199356	20.2604	1.37004	25.3884	81.7049	7.31449	86.5584	20.8198	60.1097	133.009	16.3982	118.97
TCGA-EM-A2P0	0.0976399	0.0197318	30.8965	5.17852	0.0117053	21.5679	8.04885	4.09497	43.3327	69.7954	22.7972	1.24879	180.19	86.6536	4.44056	0.0481724	103.252	13.0446	83.2063	5.39741	155.129	122.717	44.9671	16.6096	6.87339	19.2685	22.0924	46.1716	0.197255	3.36855	0.881946	1.78446	4.42677	131.415	3.37086	0.0510551	24.5789	0.10668	16.6111	0.939707	17.8085	51.1495	7.85766	74.2578	14.7012	58.0993	107.058	12.0523	78.4542
TCGA-FK-A3SG	0.098092	0.0367033	23.4332	10.6097	0.0164964	41.0668	14.3274	4.28103	61.824	106.35	25.9183	1.43777	234.065	87.702	10.406	0.0559461	125.84	14.9151	120.631	9.02054	177.889	117.272	98.7434	23.7668	13.4456	21.1596	36.8134	57.8693	0.201797	6.66994	0.803522	1.45144	3.60663	122.012	6.67086	0.109441	37.4235	0.143605	24.0197	1.66165	15.2341	67.9482	13.3202	116.421	23.3803	57.5886	112.593	19.3778	88.3439
TCGA-H2-A421	0.0476382	0.0336329	10.6123	4.90717	0.011184	24.1468	4.68707	4.08263	49.415	49.4522	26.498	0.571578	166.638	70.0108	7.14234	0.0279363	75.7923	13.9926	88.5507	9.65943	68.8834	88.8101	77.419	20.3437	5.08209	22.6395	30.3456	48.4467	0.260724	5.56872	0.847739	0.957779	2.8027	136.564	4.28517	0.122343	25.461	0.248052	18.4259	1.71361	6.4104	26.6974	7.96709	99.0197	30.9677	46.3284	61.8279	10.9804	53.0564
TCGA-BJ-A0ZH	0.124296	0.0572353	33.4896	8.81283	0.0158674	32.2149	10.0427	5.08189	53.4842	108.929	28.9186	1.26352	206.416	81.2858	7.85759	0.0660831	122.543	14.8186	109.356	12.8607	145.374	148.832	115.37	23.4003	10.9931	22.0536	43.4635	61.1943	0.291958	7.30855	0.858227	1.43405	4.41983	196.395	5.79458	0.156359	35.1509	0.253217	23.3269	1.37515	17.4698	55.9973	11.4528	106.047	26.7827	53.9972	115.191	13.6932	105.583
TCGA-EL-A3GX	0.0783039	0.025369	24.7201	6.80543	0.0126392	18.8633	8.32806	5.57796	69.4082	88.2594	28.9175	0.861107	185.744	88.3954	4.3462	0.0658157	117.67	17.0854	113.776	7.22703	200.716	109.067	84.3278	21.9157	9.10908	23.3729	41.0553	73.9716	0.383959	5.89599	0.916187	1.34989	4.68752	166.758	4.84508	0.070764	27.6189	0.232413	20.3238	2.26729	13.9269	47.9407	9.0241	102.463	28.5487	48.1115	99.233	9.46322	99.6871
TCGA-DE-A4MC	0.105053	0.0460623	27.0748	8.16421	0.0164186	27.9184	12.9516	5.36903	70.6513	94.0702	28.7711	1.36618	184.985	75.822	6.86267	0.0766721	147.309	15.005	93.5108	8.94465	202.41	169.561	122.474	20.274	14.6445	21.7737	48.0214	84.3551	0.450246	9.69995	0.923532	1.24479	5.47901	224.016	12.7184	0.155454	34.2664	0.366926	32.3159	2.00219	15.0154	62.976	11.8224	142.735	32.0286	58.8906	122.999	12.4298	100.699
TCGA-ET-A39N	0.142282	0.0573454	48.0329	22.8717	0.0175551	30.3042	3.81197	4.4792	54.5659	158.518	23.152	2.51795	307.809	102.643	6.60314	0.175267	107.169	15.7196	130.331	18.3246	125.652	195.435	92.5472	21.751	18.9949	23.1221	24.1422	31.2856	0.221154	4.9493	0.870272	4.92403	4.92279	98.0882	6.84573	0.110079	38.7974	0.0737497	13.2276	1.69674	24.0248	35.4385	15.3297	59.9003	23.4708	46.4402	258.822	15.8604	143.16
TCGA-EL-A3T9	0.149195	0.0117958	28.9166	9.89345	0.00756272	28.2918	8.10164	5.77774	58.3215	118.188	14.8087	0.602512	191.856	53.4125	5.92128	0.023467	82.225	11.3772	102.631	7.86139	102.005	119.279	67.0527	12.8491	8.86131	18.9264	15.5271	33.938	0.170784	3.19997	0.715596	0.998095	3.76639	96.5926	6.83326	0.0335535	21.7639	0.0865098	20.103	2.25605	18.7434	87.7589	5.82015	98.0052	13.9284	39.4278	74.4643	19.1088	106.12
TCGA-EL-A3CS	0.187891	0.0377903	69.5446	10.6306	0.0107768	25.022	11.769	5.05919	49.1624	136.874	23.7369	1.67879	188.17	77.0768	6.54983	0.0770514	138.928	13.2687	97.0684	7.65736	218.876	227.139	80.7165	19.9809	14.2682	20.0703	28.1434	63.1929	0.283687	4.98312	0.848499	2.63716	5.57065	282.05	10.1878	0.088212	29.1079	0.167555	18.7804	0.87879	32.5963	83.0811	10.1368	69.8673	17.9902	66.8872	203.007	13.8318	140.543
TCGA-DJ-A4UW	0.0874571	0.0217001	17.6517	5.00515	0.0112902	34.1168	8.0537	3.47227	28.0853	68.312	17.781	0.874287	167.003	66.3432	8.54544	0.0309263	76.2114	11.362	86.3855	7.62608	105.458	85.8751	44.9809	16.7768	5.29178	19.3033	18.0827	27.0783	0.177474	3.67528	0.751909	1.51868	2.99537	82.7472	3.75672	0.0631619	21.2111	0.106371	14.8799	1.13881	12.6071	53.2661	7.91208	65.2874	13.1219	46.9525	89.4976	17.4655	54.1219
TCGA-EM-A3O8	0.0724621	0.00930978	29.9547	2.52576	0.00695659	27.7457	5.84385	3.20192	16.2006	74.7885	18.8846	1.63551	202.338	92.7286	7.66464	0.0660852	73.2673	12.8259	80.4947	3.67987	120.169	99.2911	43.4561	19.1216	6.1341	18.2654	14.1808	24.7139	0.122609	2.82817	0.804769	1.56007	4.66737	67.0215	11.1556	0.0169844	19.9518	0.0452131	9.70334	0.754991	9.86506	32.8294	8.46233	49.953	12.4783	61.8206	103.141	19.2437	58.1063
TCGA-ET-A3BP	0.0994826	0.0322274	35.2532	6.76128	0.0124563	35.0755	10.2954	4.22228	32.3709	104.049	27.5927	1.11324	248.844	105.475	7.54081	0.080576	118.217	16.4643	102.733	9.376	174.577	111.003	74.8409	22.1635	6.95727	22.7893	28.3453	49.3414	0.198993	4.99005	0.87852	1.70869	4.34528	96.2137	5.87249	0.0593434	22.6577	0.131983	14.8225	1.51764	14.1736	47.2519	11.5178	74.4824	20.5712	57.7989	98.1452	18.8262	88.4629
TCGA-EM-A3OB	0.148992	0.0121119	45.3454	3.57104	0.00985413	28.9603	12.0612	3.19881	24.4138	98.9458	18.4915	1.85918	227.631	126.507	5.47049	0.0845498	115.407	16.1589	98.3166	5.24242	124.083	108.336	56.516	21.9913	11.6531	20.1994	18.888	23.9816	0.205059	3.93609	0.878088	1.57948	5.6	74.9505	10.5947	0.0295324	18.8875	0.0514292	9.67099	0.802252	20.7785	41.6309	11.6775	64.4755	12.9866	47.1555	94.2997	20.3983	80.4544
TCGA-EL-A3H1	0.0863279	0.0114437	22.9428	2.66949	0.00588031	19.5421	3.42937	3.03677	15.9855	57.1461	20.033	0.973356	212.736	89.7345	4.1034	0.0370677	66.9682	13.049	80.639	4.39627	49.5896	81.5276	31.8276	15.8727	5.81422	18.7811	7.22174	24.4522	0.126273	2.11005	0.781926	2.06685	4.2984	74.0572	3.17232	0.022121	16.7807	0.0386284	6.64964	0.649132	12.8531	29.3157	7.25	51.4366	11.4206	48.2483	82.6443	13.444	60.032
TCGA-CE-A485	0.0517667	0.00967835	11.4791	2.54984	0.00788621	21.1554	3.51021	3.27733	20.4849	42.7973	12.9432	0.531163	151.177	61.075	4.42332	0.0166635	60.6305	10.4252	79.185	4.41857	49.5932	67.4265	30.2226	10.6619	2.62623	17.6369	13.6812	16.8408	0.150993	2.27298	0.747351	0.84897	3.11015	40.8582	2.00413	0.0333991	12.536	0.0643228	9.81483	1.04033	7.92364	37.8281	5.31116	58.7349	7.92468	33.791	69.3393	14.6384	37.9873
TCGA-DJ-A13V	0.110588	0.0225729	38.8134	5.48181	0.0117165	31.6523	8.31296	3.6841	51.7784	84.5218	23.1692	1.06891	219.944	112.654	5.63439	0.0470086	99.567	16.0235	106.455	7.16342	243.063	101.796	59.6538	20.3541	8.06369	23.0599	21.2127	36.0182	0.205621	3.32584	0.854616	1.98727	4.03324	145.544	3.63766	0.0693109	24.2204	0.149383	19.8042	1.28763	17.5697	71.8066	6.96463	77.8948	16.366	58.2782	90.0699	17.0485	79.037
TCGA-ET-A2N3	0.0363872	0.00589004	9.9661	1.0784	0.00328621	17.1116	2.88838	2.24902	8.09041	40.3587	16.6309	0.573626	240.622	125.562	4.43753	0.0250486	52.0482	15.5703	104.568	3.61629	50.1907	57.9349	31.839	17.5436	4.11653	19.9112	5.67703	7.41788	0.06621	1.24588	0.774565	1.24916	3.60243	21.471	2.13324	0.00980196	13.4778	0.0127666	5.25942	0.499239	4.58658	13.9177	6.71931	38.2358	10.1051	37.1459	45.2429	14.0953	35.817
TCGA-DJ-A2PS	0.0761856	0.0106382	21.861	2.81498	0.00871762	23.2638	5.40767	3.274	24.7274	61.9068	16.7395	0.997847	147.425	78.3247	4.66002	0.0412367	88.2786	12.1816	78.5098	4.18512	154.243	105.764	36.8449	15.6383	5.06887	18.5182	15.0851	28.4658	0.149406	3.28978	0.7378	2.2917	3.88157	83.9352	4.1786	0.0301254	17.4276	0.0878679	11.3356	1.0749	13.0204	40.7291	7.676	60.7724	10.2788	44.118	76.0394	13.7094	60.898
TCGA-BJ-A45C	0.116942	0.01399	45.9458	3.83326	0.00618882	27.4979	3.37725	2.76291	14.5999	55.1013	16.2577	1.8366	245.109	138.7	5.92557	0.0631666	69.6811	16.1163	88.5419	5.25366	91.7304	85.7385	31.8703	16.9716	5.35865	19.6505	8.61762	19.8024	0.111029	1.9526	0.855062	3.42015	5.30845	98.3839	3.59738	0.0296138	19.6972	0.0414927	7.9122	0.58328	14.549	40.6571	5.58654	36.6041	10.992	54.7438	73.881	20.5914	75.8985
TCGA-EL-A4JV	0.0743652	0.012719	28.6841	3.20239	0.0074486	33.2695	4.8495	3.02744	15.2315	62.5949	17.038	1.2081	213.665	94.6808	7.79479	0.0504605	62.4124	14.012	88.7265	4.5034	55.7923	83.3488	40.084	17.341	6.09938	19.1614	11.3235	21.5717	0.122179	2.64182	0.796839	1.346	4.43424	44.7543	7.33474	0.025483	17.2006	0.044008	8.21412	1.12329	10.2811	25.9966	7.1242	52.4322	11.9283	44.0435	74.7471	23.2578	56.1405
TCGA-EL-A3CU	0.0581855	0.0143008	14.5894	2.85795	0.00811138	18.1161	5.19004	4.19027	38.7251	45.5669	22.0034	0.535474	134.648	56.4564	4.19388	0.0236366	74.3113	10.9254	76.4454	4.40297	113.448	97.5706	37.9042	13.9406	3.80361	19.0332	20.0543	51.3597	0.211652	3.82872	0.78633	1.60964	3.08386	131.021	2.2367	0.0404636	18.2475	0.171982	15.3245	1.36024	9.4036	36.7501	6.41627	75.8441	15.2388	51.3784	73.0577	9.90327	59.9298
TCGA-KS-A4I1	0.0527459	0.0126925	19.6012	3.10036	0.00696844	25.2253	5.85254	2.67116	47.1157	79.1442	20.3322	0.489978	269.496	154.466	4.94421	0.0377873	67.7054	21.2343	128.532	5.80039	115.67	63.7167	72.5613	28.6269	5.47827	26.5076	22.6924	17.5212	0.168921	3.42376	0.87005	1.00738	2.78857	49.8209	3.37064	0.0336792	24.5426	0.140197	11.5739	2.11031	6.27079	23.0469	6.3033	68.3287	20.3669	38.926	80.8809	13.6718	57.1969
TCGA-DE-A2OL	0.0770704	0.00672026	25.8108	1.8976	0.00449026	13.4946	2.37238	2.81003	13.3847	52.7552	17.6303	0.994398	245.089	113.266	3.04655	0.0381785	56.7516	14.5937	92.5571	3.63548	60.4804	68.822	20.829	13.9466	5.40557	19.0087	5.01249	14.6426	0.106704	1.28647	0.858675	2.18342	5.14867	51.4757	2.52047	0.0139019	15.7555	0.0268305	6.27077	0.619289	11.3061	29.9911	5.12299	41.9646	8.73756	44.4954	83.4999	13.583	56.2969
TCGA-EM-A22Q	0.225441	0.0338385	36.9251	14.095	0.00819163	35.4869	7.25411	3.14288	23.7782	92.7022	22.2418	1.32525	280.9	88.1039	6.6423	0.0524969	36.7591	15.9736	102.51	21.5115	52.8051	92.723	97.8781	30.1449	4.41749	23.2013	11.1265	12.0711	0.0834703	3.40843	0.699043	1.26863	3.54967	80.6413	3.86957	0.0754243	54.2057	0.0573327	10.5437	2.43022	17.3067	26.3325	9.20023	74.7095	34.7755	26.7542	67.4523	15.4814	106.934
TCGA-CE-A483	0.0836402	0.0243437	29.8837	4.01706	0.0101734	23.4575	7.459	3.54506	31.9761	82.5879	28.1981	1.18943	214.075	108.421	5.62482	0.060719	118.055	16.0081	103.696	5.68796	185.87	127.727	64.0919	22.5623	8.23487	21.6921	26.4733	50.0115	0.199163	4.2133	0.941038	1.6961	4.89771	156.419	4.70789	0.0496451	24.1364	0.151419	15.8408	0.971408	13.9971	50.0332	10.1733	59.476	22.3015	69.1191	104.186	12.4961	81.4281
TCGA-ET-A3BX	0.236561	0.0279733	73.915	13.709	0.0128176	15.6938	8.23015	6.03981	116.505	133.538	32.5674	1.65066	227.431	97.498	2.87335	0.0541031	138.251	16.4854	113.236	8.20056	196.501	172.231	98.3588	18.4918	12.6975	22.1804	47.065	94.7518	0.402848	4.76219	0.992008	1.7952	7.1783	281.855	2.99465	0.0829673	41.4114	0.265596	26.523	1.49538	42.5026	100.781	6.93623	152.007	27.1446	50.3904	163.946	8.42922	147.301
TCGA-E3-A3E1	0.17461	0.0297411	51.4582	9.78954	0.0113092	22.5255	11.8413	6.01526	60.1623	112.341	24.6645	1.36619	204.285	79.048	4.68092	0.0771106	130.989	14.7464	100.397	8.73973	237.313	142.623	88.5534	20.1806	10.6225	21.5223	29.0378	66.6858	0.264889	5.12781	0.830336	2.43881	5.82022	207.748	7.64004	0.086813	32.4724	0.193068	19.2445	1.44296	26.0191	70.9729	8.45698	88.2448	20.1594	49.6228	187.128	11.0781	136.31
TCGA-EM-A1YD	0.0942538	0.0231001	32.0001	5.27164	0.0116716	25.235	3.92529	3.46158	21.6298	61.944	24.5882	1.38786	180.926	69.0854	7.69444	0.0435577	59.5908	10.5181	68.4621	5.32163	50.3583	117.622	25.3894	17.7352	2.87256	18.1344	9.44754	23.7125	0.147288	3.12179	0.749315	2.45686	2.89485	70.0193	4.11258	0.0646589	16.9257	0.059006	8.93648	0.978013	16.6545	29.8707	5.97475	41.8602	14.1783	65.8767	79.5047	14.9884	57.9229
TCGA-FY-A3W9	0.0786867	0.00828254	38.8451	4.02808	0.00529468	28.3924	4.05303	3.06895	18.8835	74.0257	20.3055	1.47642	281.65	147.792	5.80043	0.0530588	96.1415	17.5753	91.671	3.94507	103.208	71.8721	50.2931	19.8826	4.83336	21.5325	8.96053	25.1077	0.11601	1.95016	0.877865	1.73202	5.62198	68.36	5.17889	0.0183281	17.9128	0.0324965	8.51458	1.03061	12.0957	39.7587	8.1024	48.3324	13.7148	51.3834	60.0392	21.2281	70.8658
TCGA-FK-A3S3	0.0733637	0.0182152	28.1801	5.15177	0.0108765	30.7345	13.3297	3.7688	36.8677	73.5829	19.7269	1.34	217.214	89.4522	5.64931	0.0489224	73.0168	14.141	105.56	6.53591	112.798	94.1977	69.6069	21.2416	8.68604	21.0459	19.2087	29.7596	0.152563	3.95847	0.784107	1.33997	3.41006	65.9233	6.89339	0.0507384	27.4476	0.079708	14.2134	1.5795	11.9398	42.1258	8.58626	69.0792	16.5918	43.1251	103.499	18.6187	63.1941
TCGA-DO-A2HM	0.0322459	0.00672225	4.18722	1.57064	0.00665114	15.3194	2.56111	3.7777	15.4658	36.5943	11.853	0.344771	102.795	40.3036	4.43594	0.0203387	56.5451	9.51783	68.6981	3.13589	50.2955	84.1885	26.7408	8.62782	1.99897	17.4619	13.1396	18.4567	0.174751	3.18868	0.690666	0.632933	2.9433	42.6536	1.89216	0.029646	13.3375	0.0764875	8.0977	3.03439	5.33252	22.8234	5.27201	65.1615	11.2545	23.0147	41.7009	7.01534	38.5175
TCGA-DE-A69K	0.0932127	0.0160935	41.0756	6.25214	0.0122355	29.9497	10.5317	5.29637	54.9067	90.1086	20.5704	1.2169	201.141	85.3584	4.06063	0.0443774	86.5622	14.1679	104.251	8.94304	194.331	105.474	71.0518	18.0479	8.01809	20.4804	19.0781	34.678	0.197411	3.22152	0.795615	0.991954	4.59071	84.5408	4.75946	0.0533147	23.1646	0.100614	17.7115	1.67693	15.9698	60.2333	6.98939	91.5614	15.3543	39.5511	110.837	17.5402	81.1137
TCGA-IM-A3U2	0.149303	0.0512038	40.459	12.582	0.01459	26.1848	15.2467	6.29117	86.9389	109.567	34.7148	1.56409	234.323	84.7158	7.22849	0.0517376	133.826	15.7153	124.987	17.4427	195.968	169.822	140.026	29.2407	13.3148	24.0394	47.2383	69.2117	0.302348	7.02598	0.895186	1.48806	4.56197	392.013	6.51271	0.14633	52.4856	0.325061	31.5145	1.66154	18.0991	83.3443	8.87089	137.603	34.7259	61.4421	163.015	11.8106	134.507
TCGA-ET-A39T	0.160855	0.0226947	64.9332	7.1355	0.00922991	22.5401	11.8704	5.65943	34.7442	115.349	25.283	1.67623	208.753	89.3019	5.52071	0.0970587	136.586	15.698	107.673	6.34495	235.471	175.747	69.8841	22.4294	12.7787	20.9814	25.8543	63.673	0.223273	4.14529	0.823885	3.01344	5.85887	196.867	8.27312	0.0543217	33.3004	0.11792	14.6841	1.0116	25.7806	68.7929	10.2567	56.7455	17.4317	59.6949	179.717	11.1291	132.94
TCGA-DJ-A3V2	0.0297861	0.00995147	6.44288	1.83213	0.00613924	21.4305	5.25159	3.12657	27.7154	40.685	16.514	0.438047	135.634	63.8803	5.29139	0.0275269	55.6571	12.4332	81.1447	4.84341	109.863	74.1484	39.5213	16.0563	2.99622	20.5376	14.9513	21.4814	0.131242	3.54787	0.69671	0.955335	2.57351	38.8693	3.28297	0.0289589	16.9884	0.0918792	10.0071	2.1902	4.33541	19.1145	7.36963	62.01	15.6228	29.9196	48.645	10.2028	38.2913
TCGA-ET-A40P	0.0353962	0.0140255	9.55677	3.29417	0.00724299	43.2375	9.06119	3.08932	18.0286	64.5672	17.2234	0.836622	200.871	82.0572	12.0273	0.0391354	81.2219	13.3002	99.9713	6.01817	76.3585	78.2156	60.8237	20.249	4.45544	19.5679	22.4062	20.6656	0.108836	4.38375	0.677794	1.25142	2.94726	21.7605	5.90508	0.0244111	24.6128	0.0430926	8.88104	1.26866	4.54083	19.6404	10.6932	62.5808	13.7518	43.2956	72.7325	22.6978	46.0101
TCGA-DJ-A4V5	0.0523717	0.00744138	11.8927	2.94534	0.00638853	12.8407	3.65084	3.70581	34.7493	50.4342	13.5232	0.622669	160.619	59.7663	2.27332	0.0205664	44.7799	12.2011	88.4083	4.31988	67.9771	57.627	36.7002	11.1526	2.61289	20.2043	10.8173	19.4551	0.138197	1.65671	0.754148	0.860764	3.04733	32.6375	1.62989	0.0241147	16.3987	0.0557541	10.2328	2.5529	7.76467	35.6068	4.96399	63.4285	11.5271	24.0905	69.1776	9.31951	49.1556
TCGA-BJ-A0Z9	0.173885	0.030667	54.0691	11.412	0.0111664	16.8512	8.83264	9.24548	104.151	103.868	33.179	0.822838	204.854	82.7099	3.62683	0.0440693	125.818	17.9721	134.004	7.94162	250.773	199.4	103.467	23.2467	11.9001	23.9097	53.8162	89.0775	0.273136	5.32259	0.917035	1.24249	5.49646	237.354	3.99079	0.10599	43.4705	0.22159	25.5464	2.09033	31.4985	102.726	5.86376	126.299	30.5718	58.8199	232.846	7.71113	166.177
TCGA-EL-A4K9	0.0664241	0.0282439	24.1904	3.63521	0.0110609	28.3643	5.42032	4.07646	37.7657	66.8568	19.4229	0.891002	189.213	94.0287	6.19712	0.0383715	88.5621	13.7843	96.2868	7.71399	55.6854	111.347	58.9607	18.366	5.49447	19.5061	21.6576	32.3651	0.151033	3.67156	0.800747	1.272	3.8875	72.3674	2.19607	0.0644569	23.001	0.0945156	13.4472	1.17948	10.607	36.2164	6.10265	74.3823	13.4982	44.071	101.58	15.7719	64.7596
TCGA-DE-A4M9	0.102441	0.013194	50.5429	6.40788	0.00736882	24.9944	3.61722	3.24069	26.6833	75.5456	20.9796	1.473	244.473	117.046	4.618	0.0528105	92.7923	14.6189	83.4689	4.18267	77.8265	104.773	28.8449	16.6251	7.33325	20.2261	12.5888	27.5154	0.189911	2.50702	0.907868	3.29966	5.21971	42.6704	5.26387	0.0221281	17.3807	0.0557725	8.73141	0.769714	17.0614	32.4362	6.50283	52.0726	15.1855	49.2653	117.906	17.1264	60.2546
TCGA-EL-A3H5	0.227454	0.705898	18.6329	28.5664	0.065735	54.1107	13.9469	9.03121	120.041	75.6148	41.623	1.32073	146.158	41.748	16.2349	0.0349651	101.572	8.86071	63.6009	79.6637	97.3568	308.428	130.991	18.8904	10.824	18.9413	76.5941	177.115	1.18673	28.6565	0.921135	1.56918	2.54745	1996.39	8.95841	3.49514	59.5427	1.25962	52.2151	0.480093	20.1995	134.214	17.2171	284.746	40.669	106.337	137.649	11.6853	104.29
TCGA-ET-A3DW	0.136943	0.0223475	44.8848	6.80767	0.00983611	23.2228	5.81008	4.18637	26.3854	74.9802	25.1047	1.91239	201.82	86.2128	6.43812	0.0632531	105.866	12.3214	76.3705	5.89025	134.995	161.632	37.7472	20.9467	7.85386	18.5278	16.0783	48.7769	0.19328	4.09521	0.814391	3.81292	5.36649	148.487	8.45708	0.0383775	26.4104	0.0751484	11.4922	0.689051	20.3755	58.5503	9.22442	60.4312	17.3515	62.4407	167.876	12.2672	86.8001
TCGA-EM-A1CU	0.0879545	0.0133045	29.8192	3.19114	0.00917267	22.9849	2.92817	3.02599	13.688	58.2944	15.8999	1.49069	135.619	73.9264	5.37788	0.0699336	92.6045	11.1203	57.3475	3.18937	150.035	142.982	19.7765	13.4919	5.9278	16.3774	8.67228	35.5581	0.18214	2.63129	0.726664	5.3228	4.47474	148.712	5.39643	0.0307826	16.8433	0.0569972	9.0149	0.588276	14.7508	45.7294	8.52452	45.6978	8.98211	49.0291	79.0679	12.1101	59.4197
TCGA-EL-A3GQ	0.0628136	0.0141593	14.1228	2.63391	0.0138773	24.562	5.215	3.27099	25.3586	38.2394	17.4776	0.920097	142.66	78.1048	6.193	0.0331652	70.4537	10.925	72.2206	4.76606	145.228	128.567	25.5763	14.3666	4.31234	16.8574	18.3041	31.7925	0.189002	3.91269	0.816093	1.48891	3.43064	130.702	4.19389	0.0623459	18.8721	0.13223	11.6591	0.517431	9.90598	42.2848	6.41851	57.8455	9.36574	56.8679	79.8872	14.5571	44.5543
TCGA-EM-A4FH	0.0641604	0.00993533	27.9383	2.55341	0.0053562	27.2633	4.92632	3.13517	14.42	56.2637	18.0764	1.23835	200.733	83.7552	6.5358	0.0460116	60.6478	11.739	81.1036	4.00064	88.2699	102.206	34.4238	17.3019	5.78628	17.1379	8.28087	13.795	0.0872022	2.18405	0.743296	1.9698	3.55747	32.2613	3.58672	0.0179079	21.564	0.023813	8.2967	0.406681	8.58045	23.8123	8.15067	41.0185	10.2327	50.2222	82.8907	14.6021	52.5507
TCGA-EL-A4JW	0.118847	0.0241121	31.5712	8.53425	0.00976923	22.2125	5.22065	5.55423	53.9999	67.926	23.17	0.946831	197.204	68.717	5.58477	0.0328763	87.5513	12.8553	106.65	6.92753	91.6523	115.245	58.283	15.034	6.64046	19.4982	28.0294	61.446	0.210457	3.68808	0.869881	1.81612	4.31708	119.18	3.65024	0.0698128	27.1394	0.1212	16.0188	1.23005	19.908	65.345	6.38209	75.5287	15.8464	44.8628	175.663	12.3477	84.9431
TCGA-EM-A2CN	0.0670953	0.012312	36.3797	3.68428	0.00531897	26.0046	4.4828	2.88134	21.1164	82.9769	20.8927	0.932433	259.646	120.494	4.86656	0.0470303	91.8838	15.0056	94.5848	4.4463	117.388	78.9288	49.9953	20.1013	7.59113	20.5	10.7184	18.6528	0.140882	1.63795	0.888742	1.9591	4.07836	77.2855	3.80147	0.0237215	16.2682	0.06641	10.9069	0.689839	9.69713	35.9059	7.81391	56.7715	15.9976	52.7929	56.3844	16.6847	59.9567
TCGA-KS-A4I9	0.102252	0.0475047	33.5661	7.20009	0.0145592	27.2209	9.46287	5.55506	56.3952	94.1483	29.7805	1.07819	196.846	83.2257	5.70761	0.0544948	118.712	15.0384	97.4353	11.1733	175.699	129.866	114.222	22.6323	10.9161	22.3754	38.4182	71.5257	0.309557	5.93397	0.900271	1.21115	4.36929	225.103	5.57694	0.129534	33.8164	0.291561	22.9967	1.50808	14.4703	54.4401	11.191	104.074	30.4616	57.0346	108.771	12.3958	95.0366
TCGA-EL-A4K6	0.0234605	0.00976271	14.9485	1.42199	0.00614995	29.5944	2.52213	2.17218	12.2289	63.2319	22.0178	0.559268	248.915	194.644	7.45782	0.055943	84.9484	19.3215	83.4344	3.25449	47.8978	61.4224	56.255	25.1279	4.0874	22.2482	11.3912	11.6172	0.122579	2.08641	0.990438	0.610151	3.86986	40.5229	11.9264	0.0210267	9.52647	0.0598515	7.67134	0.751931	2.79502	12.1846	11.7174	48.3106	21.6776	57.8054	27.9727	20.7354	24.4901
TCGA-FY-A3TY	0.0719058	0.0105718	17.2782	2.38529	0.00801168	22.4172	2.47175	2.79737	9.9373	40.229	17.0383	1.30303	172.909	102.212	6.24687	0.040992	62.7524	13.1416	73.3359	3.84458	77.5543	120.257	16.0955	16.6222	4.29664	17.8506	6.86732	20.1312	0.12485	1.93221	0.831548	3.2024	4.47632	77.2259	6.28369	0.0235981	14.7771	0.0446629	7.12829	0.592031	9.94287	30.9846	5.77689	33.7279	10.9292	56.1239	72.5246	16.3261	47.105
TCGA-EM-A4FU	0.135137	0.0591709	40.9984	9.26442	0.0177801	35.5626	6.21641	4.42942	27.3398	102.84	23.9657	1.71589	205.813	74.1262	7.86055	0.0780198	112.986	12.1019	75.6725	12.9196	50.435	135.214	80.7263	18.244	11.0066	18.7573	22.3389	52.2401	0.284398	5.39134	0.837075	1.29112	5.23506	147.921	8.67489	0.114379	28.6905	0.1269	13.6289	0.824477	15.6861	40.0716	11.3932	86.6874	19.5227	54.2524	117.015	16.7641	82.4621
TCGA-IM-A41Y	0.173651	0.0831316	62.8032	14.974	0.0165533	32.0585	17.5316	5.70178	71.845	125.967	34.765	2.04574	230.524	101.869	8.35462	0.114787	142.301	17.3049	112.509	16.219	260.982	250.194	166.521	32.6011	26.3395	24.0727	46.1424	86.655	0.31907	7.37623	0.930412	2.05	6.12222	368.343	11.2774	0.192708	46.3965	0.323821	33.167	1.42556	25.0928	77.4472	15.6996	117.188	40.9581	72.7149	166.013	14.2391	137.643
TCGA-EM-A4FQ	0.174179	0.0729519	45.2544	13.3201	0.0166866	33.0923	10.3558	5.64817	68.0302	120.198	31.5847	1.14226	195.936	70.6009	7.91427	0.0607264	144.944	13.8545	93.3661	17.175	215.628	165.051	157.146	23.8874	15.6481	22.5903	49.1361	80.4439	0.358958	8.47641	0.833968	1.25403	4.87056	322.429	8.10054	0.217687	40.2599	0.416935	28.9685	1.71452	23.6467	64.7463	13.6982	138.683	35.5469	50.9892	134.755	11.9316	112.978
TCGA-DJ-A2PZ	0.126492	0.0430556	40.7887	8.10749	0.0124655	23.7513	9.11771	5.28153	46.9877	101.147	24.0791	1.30542	173.546	64.801	5.60196	0.0581141	115.874	12.0187	85.5263	12	166.741	145.757	84.9518	18.9993	7.72933	19.9027	32.404	64.0163	0.297756	5.67419	0.840431	1.77267	4.73623	265.598	6.04766	0.101705	32.4915	0.224217	18.5069	1.15865	19.5637	59.4364	9.33116	85.605	21.2959	56.1914	146.723	11.3568	113.526
TCGA-FY-A4B0	0.264949	0.017054	46.4142	12.6599	0.0108019	20.3101	5.76457	5.47771	20.4919	78.5991	16.5574	1.67804	245.861	95.6558	5.94482	0.08685	112.172	17.4362	87.2288	8.3355	92.6588	133.926	37.1524	15.507	11.2973	19.8623	14.4222	43.4897	0.193326	3.79183	0.814937	6.53448	8.05453	102.123	18.3595	0.0356635	48.4353	0.0322689	7.72503	2.01883	35.5102	97.1388	7.98739	50.1357	15.5144	38.247	246.846	10.4375	84.2362
TCGA-EL-A4JX	0.0600792	0.0660538	9.2394	7.46619	0.0162772	18.429	4.46371	5.41328	82.336	49.6459	31.6992	0.619266	138.296	49.7008	6.51376	0.0325992	70.8252	12.5214	79.2378	14.0667	56.9676	113.364	96.2008	18.7308	6.3459	22.126	38.2539	84.6018	0.417639	8.20703	0.885899	0.75104	2.70223	226.226	4.99461	0.288155	31.9806	0.406246	25.6052	2.62473	7.59268	32.6522	8.48534	153.141	45.0081	43.7498	61.2092	6.38201	58.052
TCGA-BJ-A2N8	0.127929	0.017354	38.9786	6.89759	0.0104591	30.5123	14.1328	5.31282	23.8465	104.033	18.3616	1.67337	194.411	73.1563	7.76462	0.0855038	96.7082	13.2219	95.5414	9.85279	128.941	123.175	72.308	21.1174	9.85283	19.2749	21.5185	34.8188	0.167271	5.20372	0.694489	1.99437	4.48973	104.638	8.10516	0.0545601	29.2144	0.0545012	12.7129	0.940099	19.0389	41.6025	12.4172	60.8935	13.8049	39.4419	123.643	13.6826	85.6903
TCGA-DJ-A3US	0.0342164	0.00682186	8.85117	1.36086	0.00538642	18.0233	2.17241	2.47866	13.9083	36.5507	13.4691	0.563717	135.495	58.6807	3.78727	0.026996	34.4968	11.6015	72.1263	2.81867	53.604	61.5086	21.9289	11.4228	2.23375	18.7841	5.8754	12.7876	0.0955539	1.60094	0.683744	1.33358	2.96051	25.2455	2.4222	0.0177201	12.7791	0.0354288	6.67578	2.04854	5.86926	17.6978	5.89247	49.4922	10.519	25.9373	36.2942	11.902	36.2262
TCGA-ET-A4KN	0.089827	0.281182	19.6409	23.4633	0.0170325	35.2527	13.0438	5.95576	112.796	94.1125	42.3611	0.911215	230.591	53.1421	8.8549	0.0364199	61.5832	13.8204	109.94	125.003	106.585	105.285	293.598	38.1019	4.7862	27.1159	52.3933	48.3245	0.217354	9.23351	0.755923	0.648484	1.92994	498.835	4.09231	1.30056	80.2614	0.459935	31.8378	4.25478	7.72738	42.0969	12.1115	217.424	103.981	31.3069	81.3481	7.76952	115.39
TCGA-FY-A40M	0.0472184	0.00851275	14.2957	1.81495	0.0067138	27.6491	1.81637	3.29019	25.9467	52.3069	22.9292	0.656161	255.534	188.55	6.3558	0.0307934	76.8872	20.6618	128.804	3.26756	52.3972	61.6396	35.2162	25.9749	4.12312	22.8946	16.1414	19.5435	0.214283	3.90815	0.959816	1.80071	2.77687	61.2399	5.56353	0.0261542	16.4295	0.104859	8.11099	0.682998	5.34748	19.6572	5.79556	39.4774	13.3949	58.7403	92.6022	15.2362	40.1926
TCGA-EL-A3ZO	0.157565	0.0383493	19.8073	13.1979	0.0144481	30.431	8.9159	6.24887	73.5175	93.6831	19.4736	1.11535	187.744	60.5938	9.63512	0.0329047	107.801	13.566	105.799	14.2789	198.118	153.258	107.05	19.1409	11.9441	22.2513	31.9211	47.5205	0.222083	6.53183	0.715792	1.58144	3.41838	191.251	7.05499	0.128489	38.7378	0.173636	27.2963	2.93776	15.8189	79.6215	7.53077	154.872	25.5481	36.1717	108.591	13.5793	97.9806
TCGA-BJ-A0ZA	0.0655813	0.0107322	22.3883	2.75449	0.00614482	16.8665	4.08875	2.8837	16.4844	53.088	19.1408	1.53976	167.1	70.384	4.48222	0.0548103	50.4976	11.9107	71.2768	4.4013	38.2436	79.6813	29.8698	15.4826	4.32723	18.0552	9.53459	25.4487	0.144007	2.59332	0.771553	1.27211	3.78131	86.9168	7.86469	0.0233286	16.7679	0.0460356	6.85046	1.17059	11.2183	22.6825	6.01049	49.2694	13.4972	42.0517	74.777	11.869	54.9602
TCGA-DJ-A13R	0.086642	0.495238	9.32723	14.2974	0.032898	32.42	4.7923	5.28966	55.6313	57.1252	47.2442	0.819693	151.762	47.8697	12.5128	0.0500899	52.8338	11.0285	60.323	38.8697	55.4366	227.882	151.65	27.6107	7.94777	21.7187	47.0295	98.4642	0.7529	25.3949	0.927127	1.12631	2.14224	888.712	12.8977	1.95171	47.572	1.14286	20.0711	0.965214	8.72232	27.8843	21.4329	143.18	79.2859	70.9361	69.1818	6.4117	64.1738
TCGA-ET-A25L	0.151678	0.0766271	40.1262	14.3109	0.02303	29.5004	10.9384	6.04894	91.854	113.609	36.3218	1.83248	227.768	90.5563	7.6631	0.0558092	134.794	15.9008	107.837	18.881	116.362	158.961	103.155	24.1387	8.63518	23.9001	47.5184	83.9121	0.482537	8.80478	0.938954	1.69144	5.05797	389.107	7.81464	0.215042	39.4835	0.417794	29.8121	2.15282	21.5811	83.4059	8.31427	146.615	35.5657	67.3168	133.857	16.5218	122.968
TCGA-FY-A3ON	0.0538729	0.00935249	13.1533	2.20696	0.00709541	14.3721	4.25765	3.71552	36.7237	52.0173	16.2776	0.677527	163.658	76.6692	3.20548	0.025229	77.0413	12.1731	86.6709	4.34213	60.5265	81.9982	38.4518	12.5109	4.27374	18.5409	18.2059	20.8452	0.13469	2.77134	0.805323	0.932946	3.65708	47.8274	1.63806	0.0283605	18.3758	0.0675875	12.2339	1.00237	8.04659	29.734	5.41685	61.7066	10.059	34.4357	97.8792	9.21093	53.963
TCGA-FY-A40L	0.103641	0.0459686	22.2958	8.02421	0.0144284	24.6625	9.5113	5.5251	61.7022	74.1262	29.4934	1.17158	193.819	78.1563	6.68866	0.0565247	138.748	14.5565	95.2422	12.46	117.511	161.635	101.378	21.2636	11.3564	21.8087	42.7936	88.1986	0.333786	7.31835	0.918028	1.3271	4.49726	297.482	9.80594	0.136885	32.0438	0.262924	24.5471	1.38862	14.6197	55.6216	11.3767	106.924	29.569	58.9072	110.931	12.1015	85.733
TCGA-ET-A3BQ	0.0613399	0.016863	20.2965	4.39436	0.00971471	25.3442	7.98619	3.82982	44.0834	63.3452	20.2642	1.00367	199.257	89.5169	5.95321	0.0392347	73.4837	13.9288	96.0429	5.86323	96.496	87.1086	46.384	17.1105	5.44269	20.8077	19.9015	39.5752	0.162786	3.2222	0.81683	1.58335	3.55564	85.7856	2.99854	0.0509214	24.7446	0.0998564	14.4911	1.51896	10.6552	43.6437	6.01552	69.437	14.694	48.893	93.1557	15.8933	66.0407
TCGA-EM-A2OV	0.273396	0.0678132	49.6992	14.3883	0.0219293	21.7614	6.94959	7.01604	35.1719	99.8513	34.7324	2.90002	190.733	64.9437	8.83053	0.128034	96.1504	11.5465	68.9915	13.5522	95.4264	334.067	60.1227	23.1874	15.4489	18.1198	21.3098	76.9412	0.386346	10.6807	0.922978	3.89954	6.1055	501.251	21.5462	0.219967	47.0512	0.210686	12.2244	0.479925	36.0885	47.4317	15.0241	75.8339	29.5432	70.0387	241.95	8.67506	114.233
TCGA-EL-A3D0	0.116913	0.0903275	38.5574	11.4599	0.028144	53.8758	13.7692	5.98976	96.887	102.347	34.4119	1.6042	221.996	112.034	10.1467	0.0634736	167.975	14.4723	94.4014	17.2428	240.116	223.982	89.5227	25.7109	12.703	21.8603	46.6285	72.1777	0.403748	9.30753	0.979316	2.47424	4.20192	450.537	7.60018	0.2459	36.1	0.333455	33.092	0.609896	15.956	100.653	11.6541	138.931	23.2916	90.8983	128.066	19.2957	94.1771
TCGA-EM-A1CT	0.0970497	0.0569052	40.3491	8.97192	0.0171149	24.2458	6.58957	4.8526	52.7187	85.9285	31.8679	1.38045	184.272	82.4917	6.24579	0.0800474	97.564	14.2329	77.5836	9.29214	162.34	160.834	83.3993	20.5133	11.6253	22.0004	30.2173	80.0179	0.382035	6.42596	0.956951	1.51029	4.40393	333.123	8.76584	0.144546	27.8601	0.32995	18.0412	1.47115	16.4619	54.3778	10.7571	89.6488	33.9626	65.3705	94.8168	11.469	90.8837
TCGA-EL-A3GZ	0.0755022	0.0124256	19.7233	3.14271	0.00778292	22.1398	3.60579	3.24811	16.4121	44.8011	20.1309	1.58999	189.714	99.0387	6.38163	0.0454984	72.8329	12.7124	71.9457	3.965	106.618	121.718	16.8492	17.5127	4.33907	18.6496	7.9044	30.1249	0.137138	2.25041	0.809447	3.6823	3.97474	98.4436	5.92554	0.0227346	16.2167	0.0434275	7.79611	0.624361	11.1904	38.3108	6.48748	39.4273	11.7904	66.5254	78.1728	15.8342	56.6097
TCGA-EM-A3FR	0.0597452	0.00799825	15.9263	2.10349	0.00461542	23.4122	6.18358	2.56818	13.2769	62.8444	18.0228	1.15287	209.766	103.41	6.5128	0.0585783	82.5728	13.5394	85.2807	3.32982	127.288	94.8948	33.0979	18.558	9.19786	19.0609	9.9691	17.4194	0.102714	2.52922	0.76641	2.47507	4.23445	45.9217	6.46982	0.0140977	17.218	0.0273574	7.49679	0.708366	8.22571	21.7413	8.34329	41.3419	11.0164	45.1354	81.715	15.5184	64.1587
TCGA-EL-A3N2	0.142102	0.0193271	39.7029	3.61004	0.0118679	23.6954	2.96576	3.53467	14.8701	54.5247	19.527	1.92384	159.813	95.8071	6.07097	0.0559437	74.3767	12.9696	73.8587	4.3375	141.164	181.217	22.6891	16.3334	6.95699	18.3737	10.336	35.212	0.194216	2.79227	0.843822	3.46846	5.12103	223.724	6.03615	0.0466521	17.0074	0.0918266	8.89965	0.646193	21.7094	63.0163	7.27104	46.7603	11.9336	70.2411	118.485	14.7094	67.977
TCGA-CE-A481	0.0402267	0.00793533	9.67519	1.74313	0.00745533	22.8131	3.95598	3.35528	20.77	39.9548	13.3534	0.562601	157.539	65.2118	5.00071	0.0218184	47.5995	11.3893	78.6141	4.23368	37.422	63.1756	30.6429	12.6735	3.36735	18.5177	9.90312	15.1344	0.119335	2.22724	0.725678	0.84616	3.1021	24.764	3.70362	0.0269383	12.7748	0.0479521	9.01846	1.54497	5.66429	20.4142	5.85702	54.0058	8.91237	28.6123	54.3835	16.2698	34.3979
TCGA-EL-A3ZQ	0.0444784	0.031574	14.5129	6.67223	0.00692271	33.2952	17.9009	3.60768	58.9571	87.6409	24.7288	0.730749	229.259	81.08	6.74471	0.0388162	96.3527	15.5955	117.102	21.0316	180.017	83.1558	174.508	33.0669	3.80523	24.5867	30.7126	20.3771	0.105034	4.88545	0.65143	0.906124	2.07195	77.6605	4.27778	0.0783558	42.803	0.0911575	15.5169	2.90566	5.64599	27.9383	10.1828	105.427	37.8594	27.8578	78.0685	10.7591	72.7911
TCGA-BJ-A0Z3	0.046237	0.0104982	11.7349	1.9986	0.00726968	21.5577	4.79969	2.81889	22.8156	42.4812	15.0586	0.492795	136.699	59.6799	4.15838	0.0252643	50.3548	11.3811	77.3022	3.9601	92.5963	71.9589	28.8211	12.6598	3.08651	19.6186	10.5307	19.9292	0.123716	2.30917	0.678487	1.8381	2.26409	50.5007	1.40222	0.032488	17.2156	0.0816746	9.85348	1.87948	8.38332	23.7299	6.95499	50.6034	11.2371	30.4138	39.359	10.2059	41.7563
TCGA-EL-A3T2	0.0942684	0.019588	28.9872	3.69172	0.0110566	27.2813	4.0365	3.25589	16.7839	56.1865	21.206	1.90692	201.873	113.046	8.26113	0.0723214	88.2355	13.6321	85.0412	5.03153	116.901	146.793	23.5084	19.081	5.91907	18.621	11.8213	37.3379	0.168774	2.64352	0.913229	3.30755	4.35	219.881	8.84512	0.0430399	16.2712	0.0680404	9.99206	0.558175	16.3963	56.3032	6.76908	41.7982	12.856	73.3143	79.5854	18.2405	67.8231
TCGA-FY-A3R6	0.0562801	0.016405	10.9683	3.939	0.00883962	22.6297	4.73095	4.39342	32.0292	42.1959	16.9199	0.596281	132.146	43.5836	5.59202	0.0240857	64.8048	9.50667	70.6909	6.33354	52.3347	86.7682	42.6068	13.021	3.63564	18.0334	13.2681	33.4251	0.171154	3.7619	0.697568	1.30353	2.66528	66.8255	3.8809	0.0578408	18.2452	0.0892887	12.1049	1.73726	9.44637	28.6995	6.91338	81.6773	13.9342	29.553	68.4028	10.8959	53.6662
TCGA-KS-A4ID	0.0675729	0.0538379	14.1753	6.30834	0.0129986	26.1626	5.37488	4.65015	38.5708	61.2612	27.1768	0.601785	154.192	52.8888	7.76261	0.0340959	70.3293	12.0222	77.74	11.1608	59.3548	107.672	85.9784	18.9305	7.33876	20.9333	21.995	53.011	0.238734	5.50958	0.783825	1.11387	3.00875	154.093	5.05172	0.185405	29.2738	0.202691	15.8106	1.58899	8.85274	26.9168	10.2309	91.9245	30.0868	42.3148	69.9392	9.37042	62.4181
TCGA-E3-A3E5	0.107668	0.0304596	41.9339	6.31738	0.0126277	32.0032	10.0892	3.79429	44.5896	103.357	26.7759	1.4797	253.384	129.3	6.52681	0.0637486	115.181	16.8098	104.631	9.21721	193.815	117.048	79.4249	23.0529	11.2195	21.9905	25.4879	34.1573	0.16985	3.79592	0.877473	1.55434	4.76181	106.194	3.389	0.0720364	26.4445	0.122406	19.2321	1.18141	16.1968	52.6319	9.66836	87.0189	19.21	59.0619	96.5244	16.1875	92.3836
TCGA-IM-A41Z	0.0799088	0.0104111	21.6716	3.35116	0.00565204	21.4334	9.39214	4.75913	15.1311	78.1128	16.7866	0.86102	180.432	68.0858	6.41307	0.0653994	86.6178	12.8662	92.4086	3.95444	73.2071	106.641	46.8562	18.213	6.32469	19.1912	15.3064	29.9947	0.131289	3.85204	0.70585	1.8936	4.68517	40.0383	9.81965	0.0241059	20.2432	0.0466305	6.76251	1.56	12.7278	24.1948	8.59335	42.073	14.1275	37.2366	131.387	11.7448	87.2391
TCGA-EM-A2OX	0.102942	0.0218476	36.2392	8.07623	0.0113922	32.9889	12.4335	4.69318	52.4522	90.8257	18.8705	1.34381	205.234	76.1375	7.00695	0.0553245	102.778	12.1446	92.8614	8.35326	168.791	109.316	90.2103	16.0629	8.50146	19.0609	36.9171	41.6316	0.23285	5.67095	0.756787	1.66241	4.60137	82.082	4.9247	0.0684758	27.5597	0.137415	20.965	1.10525	15.6606	61.7571	8.05879	90.2322	13.1136	42.9863	123.745	19.2233	93.903
TCGA-DJ-A3UX	0.0541633	0.0144851	13.4721	2.99338	0.00815242	21.9347	4.81861	3.40154	23.8077	49.8977	18.1504	1.08423	155.029	73.016	6.51449	0.051198	73.1484	12.5845	77.7909	4.85505	113.17	110.232	33.7715	15.3911	5.01728	19.5318	15.1286	30.1438	0.165353	3.4705	0.785417	2.32976	3.57228	87.7468	7.65092	0.0364678	17.597	0.0856301	10.9956	1.42683	8.91322	34.0263	7.52142	51.0696	14.5056	44.5561	78.5366	14.4821	57.0478
TCGA-BJ-A3PT	0.0523119	0.0127603	13.7965	3.51077	0.00604785	28.4602	5.79437	3.53481	21.1174	54.5936	17.8923	0.716887	188.125	70.6981	7.5274	0.0372104	64.4564	12.4639	83.2058	6.11745	64.6822	69.6524	50.9961	18.3447	3.18363	20.9491	14.5898	23.6858	0.133221	3.06751	0.690557	1.42351	3.00399	44.0805	4.8678	0.0271986	21.0115	0.0614897	8.69645	2.09193	6.98018	21.4259	7.69153	55.954	17.6905	34.7843	71.0472	14.6272	52.9055
TCGA-DJ-A2PR	0.0475214	0.0112429	19.6404	2.61437	0.00784862	16.1903	5.09295	3.56377	59.3559	61.4784	20.9343	0.818043	174.938	91.2592	2.96821	0.0342075	77.4621	14.2285	90.6223	4.28445	148.58	82.3734	37.5713	18.504	5.43746	20.5083	23.2802	33.4085	0.189349	3.51032	0.883135	0.993784	3.80556	73.4241	2.3295	0.0379045	15.6344	0.120681	16.5181	1.67676	9.77323	36.5826	5.37943	68.2637	15.4584	43.3315	69.7184	12.002	54.2386
TCGA-E8-A44M	0.020305	0.00841759	4.06751	1.25757	0.00669438	18.7	2.71587	3.52871	20.9673	28.5395	13.9876	0.345	123.307	46.9814	5.79532	0.0253002	39.7393	10.8097	68.3856	3.94721	41.4679	59.1746	27.5944	11.359	2.08488	19.7029	11.9718	19.2951	0.13859	2.80095	0.707885	0.825028	2.45466	22.3613	3.73447	0.0327065	11.3393	0.0685232	9.10298	2.60118	2.85692	12.7472	6.61397	63.2438	13.384	24.2606	33.9484	11.1461	24.8161
TCGA-DJ-A3V9	0.0599218	0.0145787	16.2364	2.98732	0.0105453	25.271	6.16031	3.20516	31.5801	58.6762	17.3322	0.760737	178.782	90.6747	5.83037	0.0326108	76.7996	13.3138	93.3352	4.8498	66.3424	84.2968	39.3214	15.6356	7.01037	19.5953	19.9242	29.799	0.163599	2.97552	0.802828	1.26984	3.61077	62.5474	2.67309	0.0494125	19.0511	0.0937529	13.6854	1.15774	10.1446	41.2781	5.97428	59.3104	12.6906	43.9505	73.5513	16.6148	56.1643
TCGA-EM-A2CM	0.156459	0.0769963	41.8591	13.7892	0.0145462	28.8505	6.58928	4.65672	40.5954	129.541	39.6519	1.7465	283.333	111.354	8.55603	0.121901	139.507	17.3062	104.026	15.2678	89.7181	150.522	120.858	32.6308	11.3714	22.363	37.9012	94.6957	0.48762	11.7175	1.06504	1.53402	5.19817	437.418	17.0167	0.168313	35.6617	0.306017	13.8867	0.921994	18.597	42.0675	13.8295	101.633	38.409	80.609	132.383	11.9149	124.795
TCGA-J8-A4HY	0.104775	0.0368614	35.6565	6.78227	0.0113731	29.8567	9.50831	4.78216	37.6004	90.6925	25.5111	1.28548	219.187	86.9389	8.71781	0.0948881	112.484	15.5021	101.989	8.76619	205.414	139.281	86.3549	24.862	10.4388	22.0735	29.3912	49.1564	0.215092	5.93376	0.80485	2.03955	4.72103	133.954	9.72369	0.0856779	32.987	0.155123	15.2371	1.49875	15.5244	40.0859	10.8818	65.1531	26.5774	50.6554	107.583	13.9577	98.3093
TCGA-ET-A4KQ	0.0987393	0.0159889	38.3504	3.72597	0.0103455	28.9742	5.15646	3.62914	19.534	57.4361	17.9435	1.54996	197.728	85.0655	7.18414	0.0576671	75.7092	12.1423	80.6529	5.81776	66.9751	97.6025	36.046	17.4234	6.38437	18.386	11.7824	26.9802	0.147665	2.70642	0.800532	1.54088	4.44727	70.4966	7.83899	0.0344985	17.6892	0.0550867	10.626	0.865211	15.7181	35.04	7.08555	46.1345	10.9678	52.0629	99.4436	19.6051	55.7371
TCGA-EM-A3O7	0.0585682	0.0105398	20.715	2.28068	0.00792365	24.7263	7.04888	3.29929	28.1518	65.1678	19.3767	0.782199	218.765	126.666	5.20414	0.0477441	83.1904	16.9602	101.837	4.41349	166.997	86.7306	41.8853	20.1708	4.84188	21.887	15.5066	19.7649	0.136561	2.68449	0.840861	1.48003	3.4786	45.0772	3.06931	0.0252577	21.4102	0.0709336	11.4303	1.37507	9.33049	29.6032	7.30955	47.9262	14.3873	46.9214	61.8183	16.631	46.3321
TCGA-EL-A3CW	0.0594365	0.012861	13.5457	2.62591	0.00880601	20.6528	3.47393	2.64905	12.8667	44.3945	12.262	0.637234	111.212	46.2071	4.33936	0.0357082	59.2734	9.44499	62.8528	4.01632	69.9523	80.6366	24.1628	10.8537	4.17932	16.6895	6.14739	21.4421	0.143576	1.94076	0.640217	2.36638	3.33351	62.6393	2.06794	0.0320661	16.149	0.0576869	8.57727	1.57283	9.80246	27.6745	7.12131	46.8605	9.60858	27.7949	43.5257	10.5593	41.5549
TCGA-FY-A3NP	0.163729	0.0135649	62.9334	5.80529	0.00871525	19.7898	9.12107	3.68928	20.5717	100.175	20.6954	1.68321	213.411	84.9242	4.69329	0.111215	82.5423	13.442	78.2433	6.18979	77.1586	116.522	47.8273	19.0466	9.2482	19.3146	9.7068	27.509	0.140031	2.93765	0.751859	2.67645	5.60944	96.8065	8.13852	0.0353377	27.7461	0.0477332	9.79548	1.22335	25.0359	37.3286	7.69111	52.1185	14.8292	46.4183	164.132	12.5337	106.406
TCGA-DJ-A13X	0.0919115	0.0146117	32.588	5.01496	0.0109001	26.8826	6.27097	3.17451	29.6707	68.781	20.2102	1.16142	190.794	91.6815	5.4303	0.0522835	79.1474	13.6654	86.0924	4.92479	172.14	87.0718	37.4089	15.8634	5.8361	19.7904	16.2959	33.2159	0.165292	3.03587	0.848174	1.45465	3.7359	84.2105	5.60814	0.0345987	16.6803	0.103423	12.0669	1.2416	16.5776	48.8523	7.92689	50.3155	14.3756	50.7927	73.7339	16.5802	64.1922
TCGA-DJ-A13W	0.177095	3.57795	24.3975	32.1332	0.0937108	39.0658	2.56658	4.17815	87.7571	68.3056	64.5833	1.12344	236.552	70.0497	10.7919	0.0559465	53.4497	12.7754	54.654	118.947	72.6721	181.329	175.253	28.1294	9.84823	23.9634	39.6709	137.115	1.22049	24.4083	1.19452	1.04172	2.02141	4919.93	11.4855	18.5157	54.6701	1.99948	25.1541	0.516466	13.1234	67.0094	28.7839	196.438	89.1404	105.111	68.0258	8.76547	62.4891
TCGA-DJ-A3VM	0.115191	0.0395946	35.9277	8.17205	0.0130566	27.8342	4.79637	4.13332	27.729	83.522	27.4762	1.41623	247.883	96.0428	7.10279	0.0766185	104.033	14.6154	92.2426	8.32794	78.8654	119.819	67.9473	20.8969	8.37105	19.8967	20.9673	59.7972	0.255059	5.50845	0.95125	1.61937	5.47475	205.721	10.6031	0.0670836	26.1306	0.140492	11.4751	0.831251	15.8722	37.31	9.54122	78.1873	19.2606	64.8602	95.0527	16.3269	84.7604
TCGA-DJ-A2QC	0.0704188	0.0201657	20.1411	4.51301	0.00813787	36.617	8.94831	3.54691	31.3367	78.2438	18.9567	0.871191	235.584	102.425	7.51601	0.0477353	69.3466	16.1912	121.907	9.11539	127.091	90.1991	73.9976	22.5174	6.25709	23.4241	19.513	19.6554	0.111597	3.51646	0.711928	1.15102	2.87208	62.1615	3.44317	0.0521803	30.1886	0.086534	11.0261	2.13478	10.248	32.3499	8.46665	63.0056	19.082	33.0498	92.1644	15.9543	70.7548
TCGA-EM-A3AO	0.0369132	0.034697	9.40771	3.77073	0.0147009	34.3333	6.71423	4.83263	50.6791	55.3443	22.1317	0.694972	166.772	73.4484	6.8773	0.0417799	71.971	13.4197	82.4258	9.18234	97.1144	136.82	71.7744	18.778	7.41391	21.9274	24.2335	28.0185	0.187887	4.96541	0.781075	0.987295	3.17938	89.1382	6.5413	0.105675	26.314	0.123376	17.9169	1.95196	4.89816	30.1305	10.2699	101.107	23.6223	41.674	66.0294	14.4639	43.0699
TCGA-EL-A3ZN	0.0564977	0.0186429	14.8808	3.44033	0.0138157	37.6208	5.7136	2.8763	21.1944	62.0571	16.3254	0.987155	178.878	91.2904	9.26319	0.0348823	82.9206	13.3436	88.8876	6.48795	92.8348	108.332	59.4418	19.3873	7.75577	19.6259	20.2547	23.2298	0.143925	3.10355	0.771192	1.03172	3.69658	48.2317	5.28545	0.0532703	20.0602	0.0730219	12.467	1.11416	8.28875	37.0414	9.71745	63.7475	13.9553	47.7313	61.0505	24.1725	43.819
TCGA-EM-A2CR	0.0614948	0.0265741	15.0314	6.42442	0.00807147	43.151	4.58942	3.42485	31.3576	82.501	27.3606	0.997526	302.09	103.585	10.5656	0.036108	64.0617	16.3768	126.163	16.9447	49.7113	72.8807	80.8648	36.4986	2.81192	24.4008	21.2166	14.4289	0.107413	4.14116	0.704134	0.984559	2.79973	30.6365	4.25647	0.0594272	43.8395	0.0676408	12.0817	2.36452	6.60723	18.5465	7.73369	90.3717	32.1649	40.3691	45.5342	19.7426	74.4167
TCGA-KS-A41J	0.060052	0.0233467	20.0587	5.40046	0.00716549	28.2872	12.6201	4.48342	52.5639	87.7404	27.8402	0.848646	224.499	88.9358	6.30458	0.0496422	103.488	16.9891	122.764	9.52823	199.559	105.273	117.927	28.83	7.68847	25.3593	31.3962	40.2898	0.169316	4.78634	0.776954	1.15762	3.64862	102.003	5.31812	0.0596978	32.9219	0.154685	17.688	2.68627	9.45277	34.7028	9.71885	90.9459	36.9989	39.8449	95.1157	11.241	89.2832
TCGA-H2-A2K9	0.0586977	0.0112213	15.0562	2.24	0.00760524	18.3927	1.94887	2.86894	14.8678	33.6415	13.1652	0.800013	120.859	55.6923	4.68533	0.0348777	52.342	9.8386	52.4177	3.08219	102.319	94.7597	16.1412	10.6811	2.69512	16.8399	5.85525	21.8074	0.145082	2.06666	0.695662	3.38897	4.04943	71.8289	4.48056	0.0296715	14.4768	0.0557742	6.65819	1.24758	8.73743	29.6707	5.52161	45.9655	9.01925	32.8522	61.8097	11.5351	47.6867
TCGA-ET-A40R	0.0347426	0.00775595	9.32263	2.20787	0.00526321	29.4285	7.58785	2.92325	20.5161	48.757	15.6495	0.543813	175.202	72.8549	7.06964	0.0262416	61.7556	12.7372	95.3856	3.88091	67.073	61.3124	41.0527	17.7899	3.81509	20.4286	12.5534	13.8237	0.0856091	2.12444	0.644323	1.14407	2.52983	17.3962	2.68891	0.0188107	18.3258	0.0339637	8.96046	1.87385	5.50988	21.0688	6.92805	51.2622	13.4598	29.9599	52.9368	15.9552	40.4843
TCGA-EL-A3ZG	0.14674	0.0238684	42.5508	8.18838	0.00949751	34.1968	16.5644	4.63781	31.1493	136.285	22.7172	1.1044	250.422	85.6965	8.04276	0.073526	164.863	14.3642	107.068	7.73862	262.069	129.144	85.8671	21.9738	14.9677	20.4149	31.9667	46.3227	0.179844	4.90958	0.81477	2.52023	5.15261	84.1328	6.61709	0.0564321	30.8557	0.0923966	16.6874	0.958459	18.6039	63.5223	12.291	69.5534	16.3435	55.5247	161.198	17.054	110.334
TCGA-EL-A3D6	0.177743	0.0995566	35.1007	15.6031	0.0286317	33.5163	13.6421	6.7034	107.331	124.646	32.1626	1.41019	159.963	58.0101	8.51363	0.0552013	164.852	11.8622	83.8157	18.3137	225.739	211.94	152.098	22.9823	16.0981	20.7216	63.7131	113.327	0.597302	13.8719	0.867195	1.51711	4.66499	582.095	8.09155	0.455381	47.0291	0.594557	43.7249	1.38789	22.6407	90.1201	13.6669	199.521	34.9797	64.402	155.674	11.8708	138.564
TCGA-E8-A414	0.0774754	0.0175079	17.7277	4.4198	0.0131664	25.8339	4.53898	4.32783	32.0291	49.5028	17.5647	0.877993	149.525	67.0527	7.26331	0.0288755	72.5063	12.5042	90.8006	6.20992	86.9736	98.8165	34.318	13.9194	5.58164	19.3631	25.0289	42.2385	0.215787	3.91524	0.806853	1.43701	4.00717	101.682	3.77385	0.056531	18.4902	0.117959	15.0239	1.76216	12.0775	50.8812	6.27317	75.0844	12.0643	42.1535	88.4066	17.2593	64.6333
TCGA-EL-A3CM	0.133467	0.0578645	39.6502	10.6744	0.0157907	29.7821	8.73704	5.21954	56.3172	88.2401	28.401	1.33071	184.877	65.8566	7.8649	0.0524856	85.2574	12.194	87.424	12.6958	140.548	153.764	82.5875	19.1901	8.84731	20.8391	30.0164	72.6746	0.355081	6.75831	0.920155	1.40583	4.08415	389.563	6.6098	0.149745	28.5583	0.373969	23.1484	1.18681	19.6097	73.9025	10.0929	95.9634	23.9455	72.4309	134.655	14.4584	103.736
TCGA-BJ-A191	0.0488527	0.00775488	14.7872	1.44438	0.00615636	17.2841	1.73719	2.57964	23.263	46.3621	22.9814	0.677389	202.388	157.516	4.77993	0.0332175	60.501	19.1776	107.223	2.39623	77.6317	69.5311	21.886	24.9953	3.79197	23.3969	12.949	14.6655	0.177448	3.07705	0.920892	2.41335	2.78625	52.3112	5.24647	0.0235769	17.7172	0.103396	7.25745	0.950811	6.35065	17.7544	4.77665	38.8082	12.8181	54.4543	64.6308	11.6648	41.6846
TCGA-DJ-A3UP	0.0546566	0.0103979	27.2719	2.47763	0.00791474	25.2583	3.92193	3.12858	17.9879	68.9026	20.1161	1.14416	202.519	113.375	5.13265	0.0433209	67.1672	15.6843	88.15	3.49103	63.9699	84.1168	38.2911	18.6687	4.39341	20.2571	13.652	20.0337	0.153701	2.98919	0.857733	1.34237	4.40315	58.9615	4.32259	0.0246552	17.4915	0.0550368	9.77774	1.12401	8.07947	29.694	6.32207	59.1053	13.1863	54.2719	63.6045	17.4911	55.7693
TCGA-DJ-A4UQ	0.0717992	0.0128344	22.4443	3.74763	0.00837179	19.9973	4.53972	3.60331	32.3089	57.4556	15.6696	0.929136	174.396	77.5619	4.72374	0.0336359	78.0203	12.4509	79.8183	5.30376	79.248	83.8747	39.772	13.4579	5.45421	19.472	14.9253	29.8323	0.151647	2.17971	0.766193	1.87629	3.92374	66.0314	2.9249	0.0375279	16.5331	0.0708422	10.9662	1.28908	11.8654	39.539	5.92841	61.1921	10.7205	38.2645	89.5037	13.3	57.2402
TCGA-DJ-A4UP	0.0429915	0.00975321	10.1646	2.32332	0.0075864	24.779	3.67411	2.98976	21.7708	41.1219	12.8838	0.572691	140.65	58.4266	5.21206	0.027337	62.6743	11.6981	76.8208	4.1	61.6636	68.0149	30.2819	12.371	3.50705	18.8633	9.52345	19.822	0.120437	2.18917	0.677502	1.26663	2.81544	25.3469	3.56379	0.0351922	12.418	0.056643	8.97898	2.51988	6.95599	20.6517	6.61838	53.974	10.6646	26.2321	47.9015	16.122	36.9411
TCGA-EM-A2CL	0.0896159	0.0107236	32.6512	2.66481	0.00725854	22.8607	2.90248	3.02763	16.4423	59.9628	20.0114	1.50791	220.423	102.834	4.44408	0.0538658	58.9326	12.9941	75.4987	3.96721	58.0021	92.4935	26.1359	15.8922	4.53708	17.5424	8.19325	22.1542	0.138098	2.22577	0.878405	2.50254	4.47255	103.231	3.69825	0.0258427	18.3113	0.0345561	7.7056	0.43146	12.2855	31.0862	6.18693	46.1499	9.95437	61.2796	76.6662	15.8392	62.5222
TCGA-DJ-A3UW	0.0827378	0.0633184	15.6822	9.54426	0.0188768	30.8836	6.46455	5.28359	77.6332	71.71	26.9042	0.839141	157.561	55.9714	8.69446	0.0391205	101.379	11.9601	81.5085	15.6071	120.154	125.556	98.9836	20.4077	7.29181	21.4891	36.0884	76.2935	0.414348	9.62843	0.808411	1.20059	2.92627	315.405	7.4668	0.291702	33.0795	0.365869	26.8376	1.93759	11.3961	50.1046	10.5569	139.588	32.6563	43.5207	82.4194	12.0232	79.5633
TCGA-ET-A2MX	0.131744	0.0565292	44.6973	12.3826	0.00977706	20.0451	13.0646	7.01835	67.7634	138.001	42.0066	1.4948	269.603	99.0929	5.29036	0.0903526	180.963	18.1451	126.851	15.7813	192.643	248.235	147.063	33.7043	15.4723	24.4553	45.5666	68.2509	0.26576	6.53525	0.97174	2.19287	6.37712	420.185	9.5816	0.137926	49.4766	0.238136	23.0254	1.31001	20.5234	59.6539	9.21462	89.4819	49.2337	65.667	231.656	7.62318	172.921
TCGA-FE-A232	0.0865128	0.0298456	28.4261	7.67346	0.0117559	24.9503	9.9845	4.90904	50.9191	77.217	25.4425	1.20151	196.94	75.3711	6.40259	0.0521523	86.308	15.3266	97.5526	9.85738	146.582	106.51	69.9712	19.1535	7.56082	23.7831	25.1007	54.8675	0.242287	4.76226	0.807898	1.52357	4.06504	123.415	5.14969	0.0934755	28.1548	0.17341	15.9938	2.61104	13.7884	45.8286	7.76166	92.1892	28.5744	41.5205	103.94	14.5	96.2937
TCGA-EM-A3FN	0.121525	0.0336182	22.203	5.53674	0.0091439	31.2295	12.9154	3.9597	33.8121	75.2139	28.6969	1.04512	214.021	75.2159	7.22695	0.0420288	67.4069	11.8667	74.6372	9.94378	90.2956	117.604	73.6304	24.1375	8.14192	19.8954	11.3058	28.2478	0.119343	3.86514	0.745222	1.90506	3.14325	118.17	5.29811	0.0680999	35.7213	0.0722202	12.5019	0.581769	11.6043	31.0092	12.2028	79.771	24.348	59.5117	92.4874	11.7849	71.9329
TCGA-E3-A3DZ	0.0530222	0.00963042	21.1399	1.53592	0.00738325	27.5607	3.44972	3.32489	13.5733	58.6571	18.8948	0.906707	225.11	108.624	5.63049	0.0466454	69.654	14.3389	95.5068	3.18991	40.5985	79.7888	31.6137	16.4319	4.43873	18.0907	9.88149	16.7662	0.117865	1.94975	0.827265	1.67913	4.10331	32.0614	4.38659	0.0179664	14.9477	0.0266034	8.04925	0.593088	7.63021	22.8487	7.03074	45.2484	8.4699	59.6868	79.7867	17.7015	52.3196
TCGA-BJ-A28S	0.0827622	0.0118445	34.6859	3.05675	0.00755035	30.5652	4.79564	2.8513	18.1022	64.1873	18.2525	1.14964	240.13	119.254	6.27111	0.0529492	74.5122	14.943	90.0539	4.39336	117.446	84.8488	40.5516	18.4558	7.30248	19.8735	12.6218	23.5067	0.13572	2.37665	0.868961	1.68833	5.11884	59.0402	7.23472	0.0234456	16.7615	0.0531335	8.91073	0.803762	11.932	34.612	8.2435	42.2769	12.0493	52.7953	76.244	20.2375	57.7929
TCGA-EM-A4FV	0.028678	0.00736085	10.0649	1.5153	0.00551996	18.4498	2.65694	2.91626	18.8881	40.5465	14.5161	0.459035	151.615	69.1667	3.86482	0.0287453	47.0155	12.6055	81.8831	3.39489	66.6394	56.4115	29.872	12.3116	2.06525	19.5213	9.9107	15.9953	0.110316	1.95824	0.734853	0.982916	2.7421	24.5213	2.35513	0.0209906	12.0059	0.0516124	7.69095	1.65965	4.56598	17.8596	5.89593	45.1736	11.0133	29.6638	48.8343	11.3762	32.9223
TCGA-E3-A3E0	0.0683593	0.0121911	20.4746	3.59195	0.0087431	25.1464	6.29363	3.15195	22.8101	76.0288	17.9695	1.23244	187.33	86.6448	5.61286	0.0623295	84.2837	14.6688	94.9129	4.39634	159.005	92.2158	43.3326	17.6271	7.69883	20.4052	15.9067	28.4637	0.145032	3.06685	0.752865	2.06043	4.10226	62.4417	5.27574	0.0340843	22.8219	0.0636963	11.0977	1.39431	11.5399	40.38	8.4822	57.2206	12.2031	46.9452	76.9876	14.1476	71.9678
TCGA-EM-A3AN	0.069012	0.0123865	21.0522	3.22366	0.00839079	28.2819	10.7002	4.10018	38.7585	68.8007	19.2757	1.07989	189.574	88.9685	5.00931	0.0362542	91.2516	13.6061	94.6537	5.79626	176.705	112.201	52.0164	19.5981	7.24719	20.1557	15.193	29.6745	0.134101	2.72091	0.753733	1.69374	3.56238	58.2426	4.07943	0.0291704	24.937	0.0651509	14.2423	1.08015	11.3889	44.1925	8.80638	66.6776	14.5239	49.4364	90.3674	17.0505	62.5017
TCGA-FK-A3SD	0.0629316	0.00816162	16.9428	2.34695	0.0044925	21.9471	9.09892	3.37084	17.6336	59.2055	22.96	1.35621	249.238	103.759	7.06422	0.0618804	54.1517	15.1226	104.22	4.45399	43.371	119.471	30.9512	24.8708	5.83013	20.8013	10.2211	14.6805	0.0832275	2.35566	0.764102	3.34459	4.19272	43.0236	4.61672	0.0151208	35.3618	0.025027	7.727	0.960599	8.1323	18.2212	6.44856	43.5394	17.7119	48.6107	91.1408	13.0285	63.9622
TCGA-FY-A3RA	0.124021	0.0273704	50.3255	6.38953	0.0112956	24.3997	12.6962	5.48235	53.1311	120.792	23.4682	1.62578	193.112	87.9055	6.45306	0.0761818	137.282	14.6137	103.725	7.2796	236.421	173.008	81.4771	21.0558	14.1085	19.7448	36.8962	61.0382	0.217975	4.37615	0.8211	2.15324	5.86439	163.186	7.69089	0.0644543	39.5995	0.113437	21.5859	1.02091	21.4194	64.0271	10.0466	73.1657	17.7696	56.8441	195.154	15.4308	121.102
TCGA-FY-A4B4	0.0966654	0.0368487	26.8078	8.52694	0.0178136	21.0764	6.86518	5.93042	70.0323	88.2578	26.205	1.21167	200.09	81.5113	5.33177	0.0497588	108.264	15.8282	110.544	10.675	95.7709	110.985	80.1456	19.5591	8.42995	22.521	33.9636	60.1059	0.271997	3.99668	0.869314	1.46381	4.98985	163.202	4.02343	0.13801	35.1563	0.134457	21.3081	2.31814	15.5716	59.1448	8.70817	108.892	24.4584	43.8409	109.654	12.5967	96.0323
TCGA-EL-A3ZT	0.11116	0.0305581	31.7483	5.41581	0.013347	23.6852	5.54195	4	47.0161	82.2085	21.4317	1.0329	199.538	101.453	6.0398	0.0395053	109.195	14.8421	99.2567	8.10307	107.445	118.765	71.7504	17.2786	9.39489	20.5075	28.3401	35.4851	0.191655	3.47986	0.908634	1.10849	4.91155	131.408	3.78536	0.0885558	27.9041	0.132039	19.6396	1.04008	16.3038	46.798	7.30681	91.5225	18.1309	47.6263	100.471	14.0564	78.2958
TCGA-EM-A22O	0.107888	0.0221007	52.9269	8.45225	0.00736564	20.4951	18.3633	5.90518	59.0136	139.066	25.8501	1.17178	259.365	101.6	5.53247	0.114334	149.384	18.2067	122.767	7.04119	339.94	173.825	102.971	23.3882	11.3717	22.7424	37.9581	51.3543	0.202398	4.39768	0.884708	2.56675	7.13473	117.78	9.87516	0.0595023	40.5767	0.114265	17.2971	1.70156	17.3201	56.7826	7.74087	71.7075	24.7468	50.6535	235.005	11.1431	152.967
TCGA-DE-A0Y2	0.290475	0.0505869	81.8901	16.578	0.0195534	22.5329	11.8193	7.13899	92.2729	130.329	36.2515	1.97153	215.897	93.0589	4.93283	0.0664963	137.429	15.546	108.159	10.5945	236.788	218.343	99.08	23.0703	15.5654	21.349	52.1008	119.489	0.382781	6.98185	1.02711	1.76302	6.21397	567.339	5.13887	0.16425	40.5717	0.32515	29.9863	1.28452	52.0072	111.653	8.03698	126.81	28.9106	76.406	185.237	12.8918	163.195
TCGA-EM-A2CQ	0.190397	0.0281999	56.8289	7.30005	0.0101939	25.4513	6.8299	5.15794	25.4279	93.1579	21.5829	2.43125	183.129	62.7085	6.88983	0.0745782	90.3408	10.7214	77.3553	5.98795	100.809	195.382	45.9748	15.7126	8.09587	16.7001	16.8091	56.3344	0.204671	3.83704	0.797063	3.51092	5.89523	217.033	7.60044	0.0563874	30.3922	0.0842673	11.5483	0.652785	29.2317	55.7576	8.23037	53.6813	13.9663	54.8745	182.023	15.086	107.21
TCGA-ET-A39K	0.0480934	0.0175258	17.748	5.14306	0.00652936	25.1031	14.6449	3.10228	47.3847	83.9669	23.525	0.881049	228.414	99.4031	5.75758	0.0478378	89.2207	17.9045	133.272	9.73534	193.385	71.8443	99.6306	28.946	5.08634	25.4591	30.3432	22.4767	0.12789	4.11848	0.757205	0.72718	2.7699	46.2943	4.09263	0.0445727	27.2263	0.108593	14.4283	3.2621	7.61198	30.6285	8.77753	73.0566	32.3177	32.5755	86.3437	11.4684	71.7246
TCGA-CE-A27D	0.0324155	0.013227	6.23614	2.35185	0.00826079	24.5435	4.96092	3.58295	26.5814	34.6013	15.3208	0.508913	133.566	48.842	5.95375	0.027034	46.9792	10.6711	74.9408	4.78451	46.6435	79.1368	29.1445	12.1359	2.75806	19.325	11.8604	21.4206	0.140562	3.4053	0.661122	1.79827	2.47125	37.6651	2.9632	0.0433419	16.9416	0.0740164	9.83909	2.12101	5.06239	18.4797	6.83592	66.9448	12.3193	28.663	51.3452	11.081	36.6517
TCGA-EM-A3O3	0.0902667	0.0277379	12.4122	10.7117	0.011974	40.5851	11.3098	7.61698	52.5475	102.474	17.3236	1.15402	212.092	61.5022	9.69984	0.0567952	126.438	14.8382	103.638	14.9108	212.311	142.626	134.216	18.3149	12.4959	22.4049	38.4171	59.4335	0.311984	9.69509	0.761175	1.17699	4.06667	131.126	16.5943	0.081004	38.4363	0.190351	23.5677	3.12806	8.87988	52.242	10.4182	158.762	24.0034	32.9715	62.1084	18.4307	77.5336
TCGA-EM-A2CP	0.0345717	0.00994916	6.8125	1.96226	0.00606404	14.2895	1.88831	3.51461	12.8419	30.6862	16.1881	0.408136	103.239	40.0758	4.9588	0.0281916	31.3781	9.59926	61.438	2.85905	36.2996	81.1936	25.086	10.8522	1.92748	17.1699	8.1733	28.75	0.133426	3.34596	0.6819	1.76853	2.61666	44.7122	4.07385	0.032185	12.6567	0.0616304	6.59979	2.27211	6.13896	18.024	5.16023	52.9638	13.697	29.5781	74.8298	5.46681	29.8449
TCGA-ET-A25K	0.0986135	0.0328133	27.407	7.93265	0.016332	29.4496	7.83659	3.94362	62.6631	74.3923	23.9219	1.29204	215.533	92.0812	7.20161	0.0469942	91.1452	14.2028	102.005	7.41056	122.282	102.949	57.8142	16.7253	7.70941	20.4421	30.5593	49.7235	0.218043	4.75376	0.886312	1.3432	3.66834	131.174	4.00801	0.110989	28.0665	0.167376	21.3744	1.29252	15.9438	63.7511	7.35619	92.3507	16.9509	59.6225	108.748	16.7458	74.9182
TCGA-DJ-A3V4	0.0968671	0.0284761	28.3368	4.71525	0.0131516	25.9868	6.70009	4.74067	34.0262	69.3199	22.763	1.38252	171.355	76.4072	6.30173	0.0598877	87.4111	13.1014	88.9386	7.17197	147.131	145.979	57.8057	18.1457	6.72267	19.8576	23.826	48.8139	0.231083	4.55797	0.861183	2.07683	4.25777	189.849	7.51794	0.0702757	25.6784	0.161097	16.6893	0.951233	13.7594	52.5984	8.77377	66.7892	18.3443	60.362	100.315	14.4986	79.6604
TCGA-FE-A236	0.152011	0.0384827	65.3757	9.25514	0.0136681	24.2633	10.582	6.27696	58.871	106.433	24.6129	1.52632	214.408	85.1524	5.03684	0.0690101	125.055	14.1875	94.9105	8.72014	183.149	165.18	68.3369	18.742	9.75897	20.5726	28.4298	64.1341	0.25285	3.87693	0.899508	2.81546	5.40928	203.662	5.57534	0.106719	35.6839	0.139326	19.7081	1.14401	23.4345	73.6744	8.37824	70.1194	16.8309	59.6651	199.981	13.42	122.733
TCGA-DJ-A1QM	0.179091	0.0303911	47.3744	10.3009	0.014061	26.8785	6.28329	5.11858	46.7782	72.1645	20.2244	1.71256	185.869	58.5438	7.46567	0.0411525	65.4938	10.8458	70.3703	8.72934	96.4763	124.585	40.7657	13.8223	6.22678	18.948	16.8557	48.8412	0.243929	4.28775	0.764498	2.79202	5.05839	187.454	6.26565	0.0863401	27.3947	0.138089	14.2657	1.49443	24.5242	70.6266	6.17679	98.6992	14.867	46.2053	140.611	17.041	98.3398
TCGA-FE-A3PD	0.0306843	0.00731235	9.04733	1.89586	0.00579952	26.5586	8.05489	3.9386	30.8246	52.5992	17.647	0.732127	178.708	82.224	5.26792	0.0264739	68.4044	13.4096	94.1128	4.68989	103.465	74.9585	53.4829	19.2083	4.41729	20.0395	15.3878	20.5269	0.112543	2.67882	0.719582	0.94893	2.87891	29.5189	4.63907	0.0223587	16.5899	0.0475619	11.8774	1.45097	4.87173	23.8066	8.26724	62.8604	13.7588	37.7325	52.048	16.9803	33.9017
TCGA-EM-A3O9	0.460474	1.19706	36.6322	41.1633	0.0586041	39.5993	7.8989	10.6538	48.0402	163.425	32.2343	1.50786	179.726	45.6203	18.7499	0.196964	107.872	10.488	68.093	40.0191	93.3937	468.338	181.312	25.5069	23.5506	18.5091	77.8443	230.463	1.06609	54.7188	0.848669	2.53911	5.00393	1418.42	27.3749	2.1363	52.383	0.562765	15.456	0.68927	50.7617	46.4509	31.26	147.1	40.5539	71.2576	281.946	9.09846	164.642
TCGA-DJ-A3UQ	0.0926541	0.0165691	25.4976	6.20027	0.00981977	23.4672	8.05651	5.0391	48.6605	72.2909	22.5812	0.943637	176.973	66.6452	5.48859	0.0268963	72.9604	12.6425	98.826	6.60038	98.2343	113.395	53.0063	16.4797	5.68569	20.5971	26.9074	44.8315	0.225459	4.0306	0.811946	1.81755	4.37281	196.254	2.93855	0.0534856	27.237	0.16262	19.3298	1.65673	14.1677	62.7943	5.88559	96.7908	17.6535	47.4998	107.729	14.5674	90.3319
TCGA-ET-A39I	0.113179	0.0114339	49.7602	3.28996	0.00716328	19.3372	6.07314	3.22122	18.2734	76.6201	22.1031	2.23047	202.063	83.6076	4.07839	0.0655799	63.2159	12.7796	77.0453	4.94103	79.4952	102.071	39.7345	19.6027	6.69289	18.7787	10.1781	29.4309	0.134838	2.54695	0.787047	1.68845	4.39088	82.745	6.13611	0.0249666	23.6569	0.0557711	8.98905	1.00128	18.7961	37.0112	6.98651	45.4784	14.8053	57.0773	117.482	13.0457	79.3432
TCGA-EM-A3O6	0.137804	0.0145825	22.0358	5.67806	0.00667236	24.2491	5.01839	4.21738	14.4725	59.0736	20.7468	1.50538	205.568	64.4594	6.39704	0.048695	53.9836	11.4635	82.5417	6.33485	96.4275	126.143	41.4775	17.0865	4.95669	18.2796	8.52558	19.2618	0.0977994	2.66686	0.695566	1.85851	3.37374	68.542	5.54248	0.0317827	29.1864	0.0303107	9.2034	0.690369	17.5889	36.1072	9.39063	47.7104	15.911	42.2744	93.1766	12.1948	59.9179
TCGA-IM-A3EB	0.128562	0.0611096	24.1886	11.0131	0.0180999	24.4463	12.9203	7.67266	94.5765	85.697	29.1288	1.53462	175.632	69.9281	7.38765	0.0766203	140.665	14.5136	99.4824	11.4119	189.594	185.429	113.11	22.0118	17.1476	22.1202	66.0732	128.725	0.465042	11.9271	0.860789	1.87269	5.24342	285.282	11.4871	0.188239	42.1844	0.255933	27.6604	2.0435	19.4662	68.1864	11.8926	155.877	30.1485	53.4165	171.16	11.0577	117.845
TCGA-EL-A3H3	0.116733	0.0476827	17.2628	9.08578	0.0239269	26.3683	11.7621	9.89523	112.464	126.425	24.175	0.950575	154.54	51.6587	5.61472	0.0880183	94.6547	11.7171	82.543	14.6251	174.218	196.209	110.021	19.6748	10.5019	20.7859	38.5937	92.4414	0.404617	10.8785	0.813664	1.03423	4.51965	131.46	24.9728	0.286617	28.0946	0.253841	24.2839	1.63925	14.5118	45.7402	10.7368	193.612	24.0998	41.758	136.208	11.216	88.794
TCGA-DJ-A1QI	0.1014	0.0171837	38.7364	4.93224	0.01283	27.5596	10.9447	4.20792	51.0678	91.0155	18.0785	1.15656	176.494	81.5075	4.95642	0.0480846	112.513	13.2986	95.3415	6.60791	194.722	111.08	55.1383	17.5422	7.30418	19.1248	26.1021	40.8231	0.199865	4.37896	0.80071	1.6202	4.06247	110.952	5.22901	0.0576491	21.1187	0.126859	18.5324	1.08949	19.0248	56.8473	8.5419	71.7407	10.9699	48.4145	117.273	16.2039	84.8756
TCGA-H2-A3RH	0.10055	0.00867473	27.5868	3.50422	0.00736724	16.2235	3.02555	3.00315	17.3169	65.3723	17.8496	0.942221	202.688	97.3473	3.35327	0.0443498	60.9632	14.8595	92.7308	4.58291	46.4147	79.069	38.7913	17.2721	5.33898	20.4044	9.94025	17.6426	0.142922	2.6646	0.84982	1.34441	4.06961	36.9765	4.65405	0.0234386	15.33	0.0595462	9.36173	1.11497	14.9207	25.2104	5.75439	46.0318	13.0422	42.4754	90.3154	12.4275	51.618
TCGA-J8-A3O2	0.0557469	0.0126727	21.53	2.86945	0.00699612	23.6385	8.43304	3.53296	46.0131	76.5111	20.9657	0.756362	215.705	137.326	4.99191	0.0430454	112.132	17.4697	107.87	5.41697	194.683	103.666	61.9531	23.33	9.90954	23.3851	25.1124	30.6792	0.165143	3.1758	0.869755	1.58228	4.00287	60.4437	3.7384	0.0347156	22.0426	0.102507	15.3801	1.4197	9.60059	42.1963	7.56932	63.0552	18.8632	47.1506	81.6973	13.9781	64.8852
TCGA-KS-A41L	0.151013	0.0442203	26.4673	8.04367	0.0114428	39.6149	6.38572	3.64437	25.3425	86.3594	28.3209	1.17994	242.773	98.2997	9.53495	0.0430062	76.9042	14.2238	90.9483	10.9072	124.142	157.406	67.6162	25.6011	8.87765	21.3588	17.7066	22.8318	0.159519	4.09702	0.861881	1.66839	3.87491	83.1853	7.07462	0.0553971	30.4096	0.0979233	12.8723	0.574192	14.8112	26.3106	14.3221	76.6268	26.2891	58.2572	81.3917	15.5741	55.1132
TCGA-E8-A433	0.0537487	0.0213989	14.7934	4.15126	0.00637433	26.7717	13.7805	4.08098	41.9044	65.8306	24.0778	0.684408	196.884	81.5904	7.47385	0.0273624	85.2105	15.0532	122.311	9.63615	102.704	94.4031	94.0009	25.2106	5.20772	23.4583	31.4123	23.6523	0.136071	4.57404	0.727609	1.05106	2.98777	65.1542	3.02925	0.0480824	31.6893	0.109244	15.9576	2.18997	7.08391	30.7768	8.10906	76.3295	27.7509	35.229	99.397	12.1846	69.2485
TCGA-J8-A3NZ	0.0965971	0.0243169	34.9916	6.0723	0.0113177	22.3151	9.08429	5.04614	54.2777	92.961	27.9065	1.05988	200.947	90.1992	4.51666	0.053618	110.99	15.2489	107.263	6.75804	229.927	125.883	77.7571	21.5074	8.75858	21.7635	33.6746	68.1367	0.253572	4.82513	0.873289	1.54513	4.52083	174.069	4.3808	0.0604102	28.9016	0.178379	20.1925	1.48224	16.7694	55.499	8.6337	85.4337	22.7419	54.2432	107.948	11.2685	101.143
TCGA-BJ-A3PU	0.0615404	0.00966255	18.1632	2.83588	0.00604915	23.9069	3.50285	2.77946	13.2612	46.0668	17.301	1.36174	190.856	100.348	7.04963	0.0437815	83.5768	12.9127	73.7893	3.74048	127.055	109.9	19.9473	17.2539	4.52926	18.1748	8.25832	21.1602	0.117867	2.08806	0.779219	3.72183	4.47919	57.9832	5.25957	0.0173508	16.7833	0.03488	7.39742	0.660019	9.15425	29.7954	6.15513	36.6632	11.1002	50.5958	88.1395	16.6064	49.4668
TCGA-FY-A40N	0.0311712	0.00762759	9.4533	1.31841	0.00541108	17.9292	2.68603	2.5742	17.8576	37.2532	17.6553	0.697774	174.516	98.7791	5.40439	0.0292345	63.5949	14.6423	83.608	3.34031	88.2124	63.7023	29.1297	18.1557	3.65652	20.3912	11.5252	16.65	0.0975798	2.00349	0.789025	0.993134	2.90632	35.8802	4.10046	0.016944	12.6527	0.0395844	8.15301	1.17416	5.08674	18.3585	6.10696	39.1412	14.8715	39.8473	43.7284	14.0642	35.717
TCGA-KS-A4IC	0.0773192	0.0247412	27.2445	4.55231	0.0100414	23.6258	11.0004	4.75576	45.6787	80.8837	24.7363	0.887253	212.575	105.227	5.16192	0.0609986	94.1308	17.2432	111.43	8.42518	147.961	104.477	76.073	22.8946	8.77125	23.4023	24.7907	41.3609	0.191884	3.94732	0.859747	1.64178	4.07462	131.759	5.91986	0.0671773	28.9934	0.143406	15.9072	1.66959	10.9338	41.4719	7.84519	64.1631	23.7516	49.7569	96.8519	12.8665	75.5986
TCGA-DJ-A3UU	0.062905	0.0131559	18.1516	3.2804	0.00985546	25.1705	5.49812	3.46257	31.2627	55.9904	16.8738	0.894817	160.335	74.3513	6.40993	0.0373832	69.7629	12.8944	79.0946	4.55713	133.758	86.6068	34.7276	15.4493	4.59529	20.5867	16.4268	30.9089	0.181109	2.99053	0.784884	1.85312	3.69673	87.2049	4.53813	0.0418624	18.1701	0.107672	12.8669	1.69575	10.7756	43.2704	6.19568	62.2493	13.6412	44.4481	63.3859	16.9993	53.8507
TCGA-E8-A242	0.183412	0.074053	40.1505	18.0595	0.0236655	28.842	17.5952	7.77827	112.842	100.691	27.1872	1.58306	167.264	54.1982	7.53638	0.047224	103.351	12.6274	96.5802	22.8848	159.554	178.027	129.865	20.0647	13.1052	21.9919	55.3705	98.7322	0.483705	9.00022	0.809085	1.32115	4.29617	447.476	5.80608	0.326029	50.0757	0.408451	34.4973	2.57591	25.7807	97.9612	8.81462	190.051	34.131	46.0139	152.543	12.3903	145.049
TCGA-ET-A3BU	0.0866573	0.0159276	31.1128	5.6567	0.00869029	20.6344	8.77982	4.41337	56.4811	74.961	21.491	1.17256	191.145	73.8395	4.3077	0.0322804	90.1365	12.0214	92.8141	6.39051	80.6324	90.6084	52.6169	14.8106	6.61782	19.1413	23.0737	43.6605	0.181758	2.86635	0.806774	1.34211	4.52813	105.574	1.43857	0.049972	26.4868	0.0882217	16.743	1.22926	16.3268	48.7534	5.71573	86.3642	13.5768	41.9917	125.938	12.23	82.6453
TCGA-J8-A3YD	0.128102	0.0253789	37.9338	5.8777	0.0130773	24.7111	4.78119	4.38328	31.5228	78.5479	24.0565	1.75366	212.413	98.5058	6.32831	0.0806373	112.865	14.9757	90.1148	7.70491	112.007	136.242	54.4436	19.275	8.36535	20.4216	19.1036	42.7346	0.20633	4.06606	0.877484	2.90934	5.95093	142.405	8.31245	0.0644187	25.3388	0.114353	14.2201	0.920744	17.6956	46.6233	8.83246	64.526	17.5117	58.1501	104.725	14.0551	83.0589
TCGA-FY-A3I5	0.138494	0.0394226	31.5954	11.0207	0.0134451	27.8048	1.51138	3.83821	22.2392	96.0191	22.9139	1.25868	177.845	77.8818	9.12709	0.106073	91.1885	12.0634	62.4984	8.13536	67.1843	136.909	54.4805	20.5833	6.16544	19.3714	12.8342	59.6508	0.221888	3.95409	0.790386	4.18722	3.70394	270.554	10.591	0.0857861	19.015	0.0945746	8.66372	1.15644	26.3983	29.4714	15.6495	47.3706	22.1165	53.559	68.069	14.2067	107.199
TCGA-J8-A42S	0.0647931	0.018491	23.0049	4.42024	0.00894111	33.6822	9.86704	3.20867	35.5621	66.5709	19.9702	0.949699	210.543	97.7602	7.46616	0.0319574	85.2542	13.7765	97.7797	5.3446	112.154	96.5577	50.7317	18.0781	7.36149	20.8369	19.8887	25.4999	0.135531	3.15021	0.818491	1.75058	3.50354	58.6348	2.3898	0.0383135	23.5653	0.0889357	15.9323	1.0919	10.5041	49.3528	8.79138	67.4248	14.8388	53.0853	91.8797	20.6529	61.813
TCGA-EM-A3AI	0.135009	0.0219975	52.567	8.98852	0.00893748	36.8677	4.78163	3.45967	18.2303	132.704	24.4648	1.30298	280.793	117.917	8.41865	0.0837041	81.9517	14.7689	99.311	6.65406	74.6773	136.591	51.7818	26.0137	6.43882	20.5695	8.66624	18.3442	0.119909	2.38858	0.801761	3.23222	3.74955	78.9253	5.35945	0.038335	22.3604	0.0397423	10.317	0.772678	18.9372	37.4177	10.677	44.4739	16.2184	79.1842	87.6967	18.9797	95.1266
TCGA-FY-A3WA	0.032322	0.012987	19.566	2.90498	0.0101478	42.0668	1.02061	2.56199	24.9841	60.2519	30.0142	2.07883	234.566	145.642	9.0479	0.0525091	137.381	16.2703	75.9518	3.93302	158.988	94.0038	25.7661	21.8903	3.63622	19.4892	19.3602	38.9396	0.169251	3.43791	0.950994	3.91635	4.77791	66.2018	19.7399	0.0215587	18.7455	0.047033	8.76706	0.711764	5.58837	29.4218	8.74296	41.2916	18.3954	96.0548	84.0264	24.7916	42.3784
TCGA-EL-A3CL	0.0661283	0.0212834	28.7104	4.72568	0.0121355	21.4337	6.93278	3.7045	64.6709	82.8628	24.4376	1.38804	215.095	113.316	5.2573	0.0542241	104.966	16.152	105.28	6.51271	73.0228	94.0638	51.0428	20.8383	6.10151	20.795	32.3891	48.8843	0.214777	4.2316	0.894841	1.16436	4.16533	99.753	3.69563	0.0578898	22.9915	0.112621	15.8757	1.22019	11.6445	40.881	5.86479	89.2202	16.4582	59.3883	108.307	13.8953	76.1926
TCGA-EM-A2CU	0.0668717	0.0121602	21.703	3.53201	0.00835749	27.2499	5.78668	3.79395	35.6024	61.3569	15.9801	0.835022	169.666	63.2109	5.18701	0.0291681	48.6275	11.2556	82.7229	7.28754	52.0157	81.0598	47.3929	15.9458	5.64298	19.6187	12.3504	17.9134	0.133392	2.76808	0.685953	0.602735	3.2175	34.6039	3.52636	0.0399709	20.0787	0.0745589	10.2974	2.28907	11.1237	30.1602	6.1186	74.6468	13.9338	28.1695	92.5267	16.7849	54.748
TCGA-FE-A231	0.175253	0.0636451	51.3682	12.6074	0.0197452	34.3535	11.1563	6.45029	51.1734	172.881	27.9345	2.13755	251.921	93.6898	8.99024	0.21525	252.994	16.7108	97.5337	8.43932	311.594	235.888	112.533	22.1192	23.4683	21.3337	33.8432	98.8496	0.399434	7.93799	0.969235	1.93251	7.45231	278.673	36.832	0.124916	29.8628	0.263291	23.8854	1.50733	24.9055	69.7876	16.2047	115.186	30.0583	68.5329	103.657	15.2788	142.956
TCGA-DJ-A3UN	0.0587848	0.0135611	22.9724	3.92712	0.0095479	26.4411	6.06151	3.35227	29.3801	76.9314	21.2418	1.1556	213.421	114.552	6.2321	0.068854	94.0719	17.1044	100.046	5.68615	145.395	89.5261	50.1579	19.1367	5.0147	22.8568	17.945	27.0497	0.171958	3.36927	0.830471	1.43974	4.65935	77.6356	6.43767	0.0358737	19.1031	0.0975632	11.9045	1.96639	9.64121	40.3008	7.36532	64.79	17.4683	45.3198	71.1639	16.6579	69.6688
TCGA-BJ-A45J	0.0564036	0.0163523	18.3526	4.22324	0.00802662	28.6202	8.92033	4.4064	62.5424	86.8993	21.1733	1.05896	202.963	87.9627	6.00889	0.034882	99.702	14.9348	116.037	7.26286	151.536	90.2807	80.3906	19.1062	8.65618	20.9256	36.6662	34.0828	0.155933	3.85939	0.777274	0.849707	3.68297	78.4309	3.27031	0.0511896	28.6996	0.0996808	19.5317	1.64917	8.71995	47.1828	7.72486	102.788	18.2831	41.5041	119.844	15.6103	80.403
TCGA-EM-A3AR	0.0958291	0.0201219	26.8058	4.91521	0.0101662	26.5922	5.31924	4.24568	31.0457	65.2987	18.4171	1.57516	175.332	75.3998	5.84397	0.0477984	89.1534	11.5924	72.3216	6.62391	134.064	130.145	33.8493	15.3851	5.71069	18.3008	14.3939	35.2892	0.189713	3.38223	0.774481	3.58668	4.1259	128.805	4.87343	0.0448781	22.3086	0.0762808	12.1196	0.737295	15.1165	52.258	7.94975	63.7509	11.7183	49.4386	113.397	15.1014	69.1378
TCGA-BJ-A28Z	0.0403803	0.025941	7.23568	4.76721	0.0121831	23.893	5.21558	4.95423	55.3384	40.9553	19.2563	0.554251	123.829	39.8974	6.41672	0.027617	52.3555	9.71219	69.1795	10.3902	41.3403	91.3644	54.7127	13.2093	3.13896	19.5436	21.3792	43.1504	0.245841	5.45363	0.726312	0.85136	2.40733	101.863	4.3857	0.136	21.6643	0.205228	16.4147	2.50415	6.43722	24.8119	7.31821	116.169	21.7035	30.4047	56.8987	9.90593	46.224
TCGA-ET-A40Q	0.0672363	0.030697	19.3645	6.61945	0.0117706	25.4954	9.07847	5.08269	59.0634	82.0203	24.6397	0.760518	173.362	65.3783	6.31222	0.0450706	111.257	13.0621	86.8449	10.991	113.824	106.493	96.0868	19.3361	7.29969	22.0224	37.0959	56.8388	0.327711	7.21895	0.839553	1.151	3.88911	140.854	7.61377	0.101623	26.6282	0.24794	20.4383	1.7771	9.30968	40.8821	9.41348	109.887	27.6711	43.2189	102.25	12.0753	82.7692
TCGA-BJ-A0Z0	0.0894945	0.0154334	39.4582	4.5984	0.00977966	21.7616	3.95611	4.01588	27.936	66.6304	21.2968	2.21258	219.997	100.801	4.33694	0.125873	67.8566	13.3126	65.06	3.955	106.703	103.929	27.1325	16.4119	6.7447	18.1091	11.0214	35.0734	0.198261	3.57854	0.824188	2.68673	4.77347	96.8816	10.4175	0.0324271	22.594	0.039712	8.75478	0.783503	17.2314	29.7498	11.4514	43.2094	13.3219	53.3886	70.6101	16.0524	61.5567
TCGA-EL-A3CT	0.264628	0.0750234	45.1317	14.7397	0.0235153	35.1579	20.3147	7.9832	87.9453	124.375	21.4573	2.31888	133.294	44.9226	9.98979	0.0941265	166.695	9.53369	80.6901	12.9289	295.945	315.167	116.259	14.6314	21.3901	16.47	71.0363	134.602	0.553146	17.1533	0.753594	1.67913	7.95243	527.681	20.2567	0.260308	41.0673	0.376918	37.1308	0.861418	38.8378	147.794	11.2619	193.132	15.924	58.8262	377.993	17.7806	181.578
TCGA-ET-A2N4	0.0781521	0.0187323	41.6957	5.554	0.010939	32.8275	7.58337	3.15487	32.8301	97.4517	22.2268	1.49747	234.139	117.14	6.82447	0.0739818	118.864	16.5858	103.509	7.27928	133.907	100.474	63.2459	20.8003	7.97231	22.2641	20.5168	33.5689	0.202817	4.20114	0.812677	1.50491	4.5609	61.9913	6.08473	0.0357586	23.5609	0.101266	12.1312	1.58041	13.507	49.5397	9.6059	69.4749	17.0205	51.7119	91.6014	19.2398	76.1587
TCGA-ET-A39P	0.106393	0.0299287	30.4313	7.95476	0.011664	23.6724	10.492	4.84419	42.1137	80.9006	24.8465	1.41651	230.05	88.067	5.95051	0.0631241	128.284	15.5978	111.996	8.06546	142.725	154.34	80.5897	20.2223	11.5476	21.6192	25.4285	63.8726	0.227961	4.4737	0.864994	1.90474	5.0824	178.968	6.98232	0.0705497	32.5595	0.161853	18.5896	1.3673	14.9745	56.2789	8.09085	72.9725	21.0852	57.8453	111.318	13.2851	90.8675
TCGA-DE-A0XZ	0.0407882	0.0121079	12.8921	2.50587	0.00963151	24.4552	3.48165	2.89389	29.1776	51.7368	18.5052	0.671677	169.715	91.6366	5.50675	0.0349118	74.8407	14.9039	82.668	4.77676	70.6443	70.234	34.5695	14.6123	3.15596	21.4698	15.1887	25.1929	0.168138	2.90174	0.842127	1.05079	3.2418	54.278	3.5398	0.0344682	13.7705	0.106074	10.8135	1.94436	6.50355	23.1144	6.62947	65.9444	15.307	38.0804	41.68	16.2548	40.6367
TCGA-DE-A4MB	0.106244	0.0335281	17.7327	10.0658	0.0142901	30.836	9.12348	5.15848	51.4909	80.7877	20.9541	1.45701	196.286	65.6167	7.94668	0.0466553	118.544	13.6642	91.2694	9.98276	116.619	124.34	76.1561	16.876	9.51224	20.7214	26.9775	66.7364	0.294599	4.55493	0.804648	1.07475	4.19868	178.807	11.4854	0.103295	29.0822	0.186045	21.8882	2.36976	14.1989	70.267	9.80131	119.636	25.2606	42.6851	79.1012	15.2537	75.7727
TCGA-EL-A3CN	0.0989254	0.0610245	24.1363	10.6986	0.017847	22.0926	7.52522	6.58302	95.1653	70.9057	37.6699	1.01189	165.419	60.8706	5.64705	0.0412782	92.9669	13.0698	86.3879	12.3156	122.289	129.551	92.5793	21.064	7.66094	22.814	47.3112	121.416	0.543446	10.6852	0.921701	1.40638	3.64604	429.432	5.35274	0.255391	33.3651	0.440443	28.5315	2.09823	13.9615	61.7	9.67505	159.879	37.8221	56.306	118.377	8.34612	94.7578
TCGA-EM-A3AK	0.109374	0.0196852	35.3198	4.77172	0.0117099	24.3113	8.18352	3.73608	37.0908	78.3509	19.1645	1.1352	186.033	76.6091	5.09933	0.0482904	92.4419	12.3971	91.5019	7.34236	136.903	103.177	58.6673	15.6414	8.00828	19.1029	19.6052	33.8458	0.176585	3.78225	0.799175	1.27194	4.40222	108.872	4.39416	0.0564727	23.7117	0.119065	14.2868	1.19248	18.2642	51.0791	7.59762	72.1982	13.1982	40.9299	111.875	14.5048	85.047
TCGA-BJ-A28R	0.0409003	0.00973757	7.31562	1.59023	0.00650645	16.5729	2.33685	2.88976	11.3003	26.9351	14.196	0.587346	107.043	45.39	5.09449	0.025545	38.2024	8.75567	55.9701	3.14122	54.3103	92.7271	13.9196	10.8486	2.13177	16.5148	6.27274	19.6273	0.11376	2.25623	0.648539	2.519	2.66162	48.679	2.84717	0.0258828	12.2506	0.0520687	6.10255	1.20437	6.45137	18.845	5.54248	38.8398	10.2082	31.9739	46.1381	8.94517	35.619
TCGA-ET-A2MZ	0.119574	0.0213867	35.7447	5.99077	0.0104311	26.6111	8.23299	3.61452	38.9172	81.9021	22.1196	1.39657	193.637	78.0397	4.78034	0.0497424	94.1826	12.0601	87.0941	6.68914	151.73	116.052	50.2949	16.047	7.15199	19.1214	19.125	39.5173	0.16315	3.58164	0.798249	1.37113	4.19707	106.982	2.90034	0.0453128	24.05	0.107111	15.3505	0.95554	22.4477	61.769	9.38431	80.974	14.1595	51.1656	104.792	13.2823	81.8453
TCGA-ET-A40T	0.0477514	0.0114019	13.8474	2.57714	0.0084728	22.8966	4.07592	3.11764	25.7764	49.396	15.7278	0.657913	177.858	81.7872	4.98655	0.0251319	61.7706	13.6461	93.5109	4.67987	49.83	66.5355	39.5061	14.108	3.02602	20.2776	14.49	18.8564	0.145238	2.38217	0.768083	1.11842	3.36552	40.3502	2.45934	0.0358928	16.8825	0.0719312	11.1149	1.71537	6.99357	30.5438	5.93549	64.0875	11.6712	35.309	53.685	14.1182	45.9742
TCGA-ET-A3BW	0.074766	0.013273	41.5139	3.48905	0.00875131	24.3942	4.96673	2.75981	26.1159	74.5463	23.797	1.11917	229.484	124.274	4.61866	0.0466976	87.0457	16.1958	98.2075	3.99829	234.799	92.791	44.0479	20.797	6.82605	21.546	14.6952	34.3174	0.152207	2.45738	0.886127	1.68156	4.21573	102.741	4.02042	0.028742	18.9933	0.101235	11.1479	1.03789	14.1719	55.9147	6.69084	51.8373	15.1616	67.6347	78.3211	16.6084	68.5964
TCGA-DJ-A2PT	0.0799401	0.0158409	14.1796	7.10884	0.00672611	17.2941	11.0726	5.81301	60.6795	76.234	23.548	0.689204	179.072	60.4457	4.60651	0.0257242	88.377	14.1693	119.672	9.30739	111.264	101.771	93.0947	20.7836	4.3298	22.9342	41.4904	42.6351	0.232638	5.32263	0.760704	0.941414	3.11623	116.02	2.93127	0.0515742	33.1022	0.160642	16.7279	2.7148	11.9316	45.1498	6.57095	112.59	27.7873	35.879	150.297	7.47535	100.053
TCGA-FY-A4B3	0.0976466	0.0183587	28.1378	6.00411	0.00906114	19.4719	9.76753	3.9297	63.2725	79.9196	23.144	1.12767	189.941	81.5972	4.53427	0.0367425	99.0777	13.4082	97.594	5.64767	56.5805	105.398	60.4782	14.1458	11.3072	20.4057	31.7094	51.4795	0.224318	3.47651	0.870136	0.987075	4.93276	105.528	2.22308	0.0481421	23.435	0.139185	22.8544	1.36943	16.9586	57.7033	6.69729	101.501	18.3657	47.8659	163.978	13.5401	98.6502
TCGA-IM-A4EB	0.0854565	0.0477158	21.7957	8.67406	0.0123108	24.6512	8.02654	5.01781	71.8025	71.4409	28.4095	0.838717	165.329	62.6985	6.36286	0.0321719	102.546	12.4569	84.5624	12.8358	102.643	113.115	107.442	19.8268	7.48833	21.5666	39.4498	62.2538	0.283651	6.9938	0.815255	1.09419	3.36481	233.929	3.54875	0.174479	31.7606	0.29371	24.3647	1.60229	11.4321	48.0273	10.1489	132.415	29.9791	44.2466	98.3654	9.02421	74.0015
TCGA-J8-A3YF	0.0587838	0.0275034	15.9522	5.02283	0.0104569	23.7686	5.87792	4.62647	56.6481	69.329	25.0991	0.741539	188.81	68.8922	5.67214	0.0311838	101.726	13.3878	91.4221	9.92025	112.666	98.9555	81.5478	18.3846	6.5627	21.3248	35.0523	44.9995	0.23475	5.90426	0.837201	1.09306	3.5891	139.218	3.60638	0.0985962	24.1298	0.199112	20.8576	1.60338	7.81785	39.962	8.07558	102.662	23.6628	39.958	87.0969	11.1207	71.2223
TCGA-BJ-A45E	0.0295936	0.0505551	2.88144	3.74124	0.00998237	18.933	1.71128	3.68978	27.3688	30.0879	23.4036	0.227927	112.926	28.4559	9.16741	0.0182529	27.5701	7.65131	54.3416	10.6056	14.9573	81.6272	50.1114	13.1184	1.26863	18.5405	15.9503	41.7212	0.274412	6.99101	0.749298	0.577113	1.40311	134.49	5.68318	0.168205	13.9073	0.291721	8.64807	1.50949	3.53919	11.6128	8.62044	77.7272	32.9377	35.4533	38.9111	4.64426	31.243
TCGA-ET-A25J	0.107569	0.0289204	40.1797	6.79183	0.0101507	25.665	9.42997	4.60206	39.3124	97.4171	24.2721	1.42054	209.826	77.4014	6.43734	0.0745746	101.316	14.3218	94.4409	8.1201	153.144	123.583	71.079	17.6302	8.14005	21.228	33.7753	66.4825	0.311186	5.32721	0.900675	1.81917	5.26047	166.717	10.4494	0.0630258	23.1439	0.195538	15.4588	1.25887	18.3889	48.061	8.85001	63.8704	21.0151	54.8018	133.497	15.4426	101.49
TCGA-EL-A3T3	0.085328	0.0421517	25.0139	8.1332	0.0143217	26.5948	9.71175	5.49338	83.6378	85.6672	28.4824	1.19203	207.664	97.3403	6.956	0.046964	120.092	16.1018	113.271	12.9743	120.52	119.404	103.626	23.5583	9.60465	22.8931	52.5937	66.4403	0.302111	5.91477	0.908393	1.39981	4.2832	198.738	4.22795	0.147389	41.2132	0.209558	24.1025	1.64523	12.6308	52.8394	9.62494	118.977	29.0248	50.0885	122.64	12.5779	88.8248
TCGA-DJ-A2PV	0.0841967	0.0137378	27.6952	4.24029	0.0100518	24.743	4.71528	3.14519	28.9881	55.6042	17.2035	0.757463	165.573	79.6144	4.93031	0.02814	54.7308	11.7346	81.0941	4.34263	97.4445	91.6006	25.1195	13.2915	4.1893	18.751	12.6631	30.3181	0.152518	2.23706	0.797621	1.41101	3.38992	88.6156	1.50612	0.0381902	17.7043	0.108188	11.7861	1.16396	16.5631	50.6479	5.02219	55.8029	10.4412	48.8604	80.2656	16.2859	57.9473
TCGA-EM-A1YA	0.143404	0.0324948	37.2461	6.70428	0.0108562	24.2692	5.06933	4.91037	20.8241	78.1081	23.9371	1.36325	220.365	81.741	7.19673	0.0952343	66.7449	14.1022	91.5016	7.12362	50.8529	181.886	47.1902	23.5682	5.73035	19.4716	14.1031	42.2474	0.217081	4.51355	0.855919	3.28463	5.2273	181.445	12.8248	0.0839226	27.8175	0.103517	7.58481	0.740577	18.5532	28.2273	8.28899	48.0324	19.8315	61.8624	123.06	11.2561	98.5111
TCGA-J8-A3O0	0.0920582	0.0182072	32.7876	5.60609	0.00954287	22.2841	5.27294	4.16223	26.1517	76.863	23.0329	1.29729	212.556	100.322	4.47373	0.065694	80.9791	14.4015	81.9778	6.17225	48.1958	95.6658	51.8055	21.0707	6.51639	20.2482	15.2233	35.3512	0.176822	3.28811	0.847042	2.26216	4.99029	77.0056	5.41928	0.0340122	26.6873	0.0622753	10.9936	1.06436	12.8889	30.8496	8.02252	69.812	17.417	47.0509	100.334	13.4548	76.5871
TCGA-ET-A3DS	0.199348	0.0262126	88.1608	7.82455	0.0143794	33.5184	3.92829	5.01886	26.299	105.594	27.667	3.80183	216.482	88.1384	7.40926	0.111788	122.772	13.7826	68.7715	7.44456	141.653	147.431	42.1351	16.5379	8.29881	20.0837	11.2997	33.7181	0.26089	4.06485	0.813288	7.00089	6.0851	113.335	7.54437	0.0558933	21.5645	0.0670582	13.213	1.1547	35.059	71.1763	14.8053	61.1784	14.7059	59.3904	122.457	18.9306	92.4782
TCGA-DJ-A3V3	0.0439916	0.0145877	13.3153	2.87956	0.00886224	27.3321	5.59076	3.04463	27.569	52.797	17.666	0.676713	175.136	81.6522	5.74893	0.0287064	59.1022	14.0405	93.6224	6.00556	70.8924	73.3598	46.9394	17.5322	4.16616	21.4217	12.5275	18.3663	0.119999	2.47497	0.715871	1.1652	2.9294	44.7716	3.16671	0.0452484	19.9856	0.0665917	10.4051	2.16571	6.72141	24.7061	6.94328	63.7645	16.3185	32.4238	51.8819	15.3308	47.4037
TCGA-EL-A3D4	0.0920106	0.0251112	27.6858	6.48709	0.0111969	46.6258	12.4902	4.57785	39.9003	75.9682	18.2308	1.18925	240.266	89.79	13.4927	0.0533317	83.3803	13.2683	106.877	10.642	73.8152	137.476	49.1533	20.8124	11.057	20.2023	18.4058	25.2849	0.151338	3.62394	0.726711	1.80272	3.89056	55.1159	4.78043	0.0620987	28.3005	0.0765328	12.564	1.6822	15.3334	45.7732	6.29723	74.6198	14.997	39.6697	105.145	29.8635	80.3701
TCGA-E3-A3E3	0.138207	0.0366643	48.228	8.16852	0.0108241	24.9544	10.3677	5.59635	56.242	110.563	28.5144	1.27226	213.304	83.8023	5.59417	0.0686944	118.121	15.4782	106.418	8.30903	225.23	154.517	85.6636	21.4359	9.98349	21.739	29.1859	63.1131	0.251057	4.38362	0.900983	2.08528	4.81121	226.482	8.20843	0.0793723	31.1104	0.196769	19.1128	1.23912	21.8714	66.589	8.93675	79.2572	23.7302	60.609	153.806	12.9025	115.246
TCGA-EL-A4KH	0.0448744	0.0148154	14.9688	3.75404	0.00574772	32.7296	12.2481	2.67829	32.0153	70.6557	19.0436	0.692181	252.391	100.41	7.4817	0.036006	71.0666	16.3828	125.211	8.56202	159.096	65.1873	86.9243	24.5431	4.11352	24.579	18.334	14.5749	0.0809163	2.40088	0.691574	1.02337	2.80391	31.7035	2.92062	0.0326222	27.4381	0.0617479	11.1944	2.75394	6.56402	29.0501	7.60909	60.8546	23.6846	28.2646	56.1633	16.4977	56.994
TCGA-BJ-A0ZC	0.147413	0.0191874	42.7267	6.75705	0.00928182	17.1366	4.31347	4.32518	24.5822	61.4251	21.2982	2.447	179.008	66.5137	4.40332	0.0622131	51.2436	10.9302	62.9351	5.94971	76.4915	145.022	30.7359	14.5476	7.77646	17.3757	8.70884	27.6518	0.163977	3.18263	0.754263	2.90862	4.41929	102.92	6.06683	0.0359975	29.9635	0.04375	9.63093	0.711542	22.5692	41.5155	9.12115	53.7974	14.6789	45.1719	128.158	10.5233	76.1684
[truncated: 149 more columns]
